# Supplementary material for: Signatures of selection and environmental adaptation across the goat genome post-domestication
Source: Springer Nature journal article supplement (doi:10.1186/s12711-018-0421-y), 2018-11-14

**Alps 1:113218602–120984378**

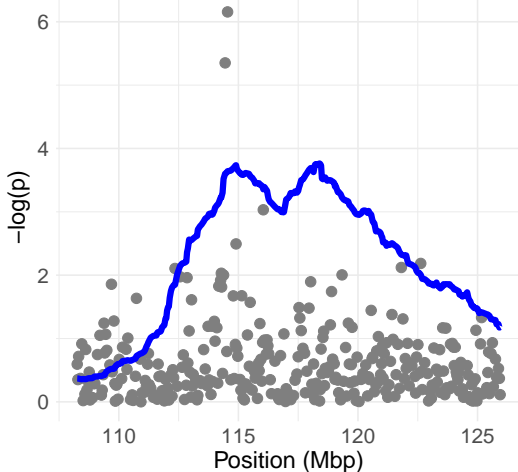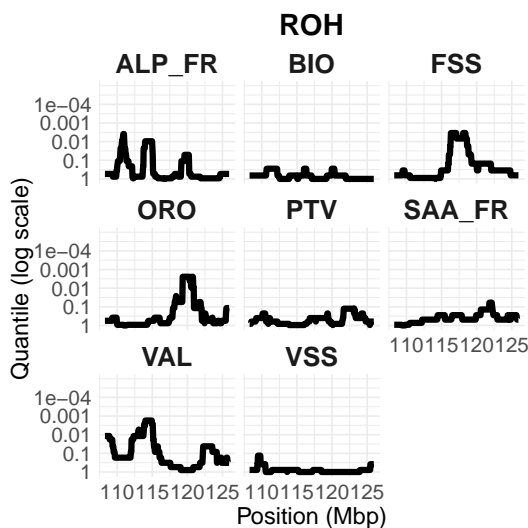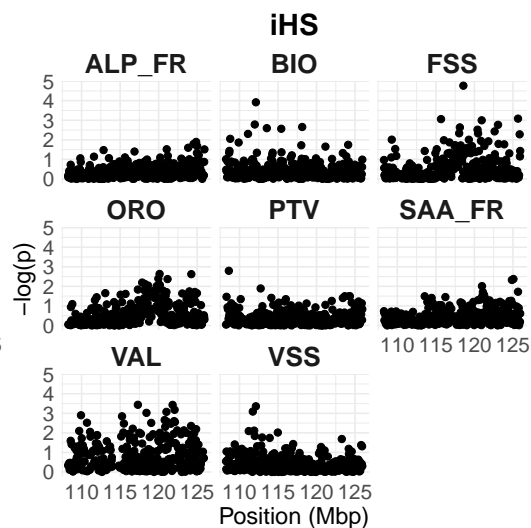

**Alps 5:110987414–112987414**

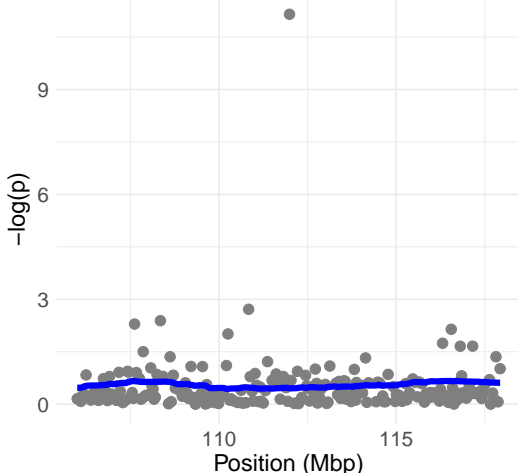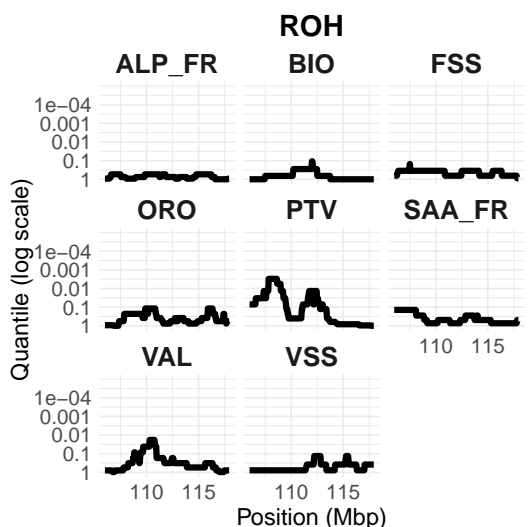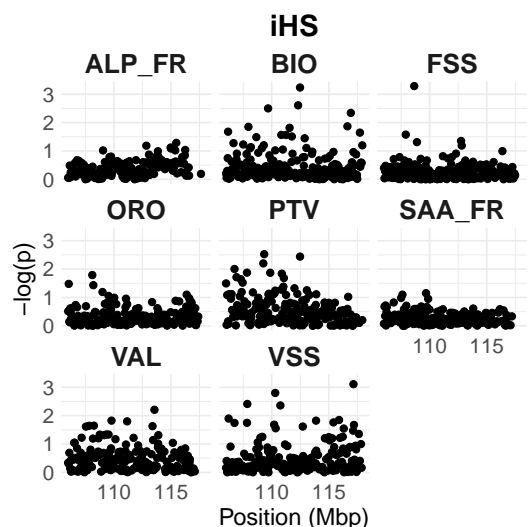

**Alps 6:83714029–86010332**

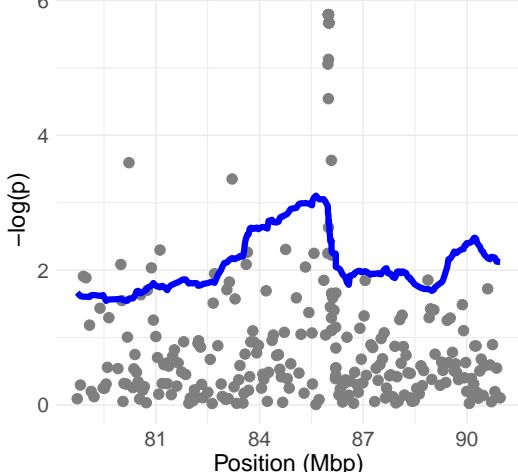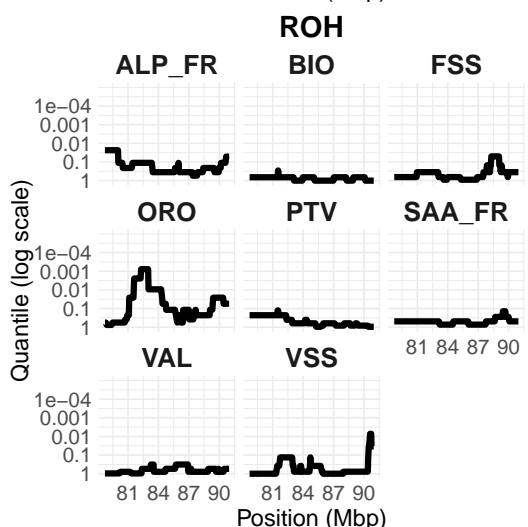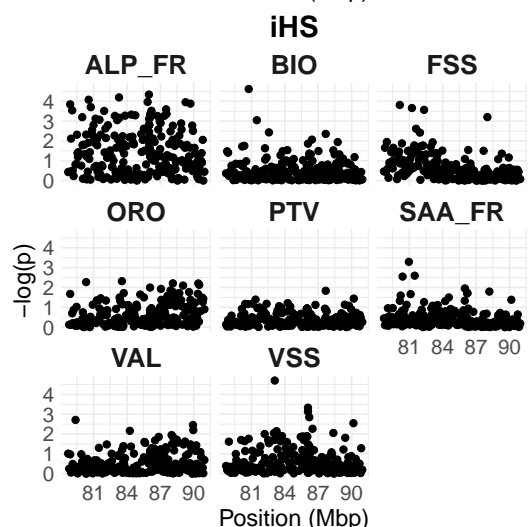

**Alps 7:85816424–93832043**

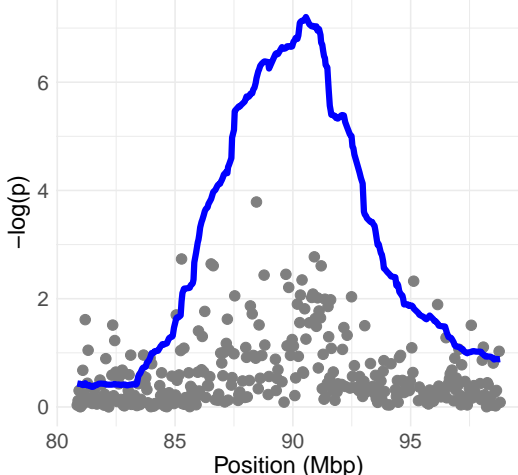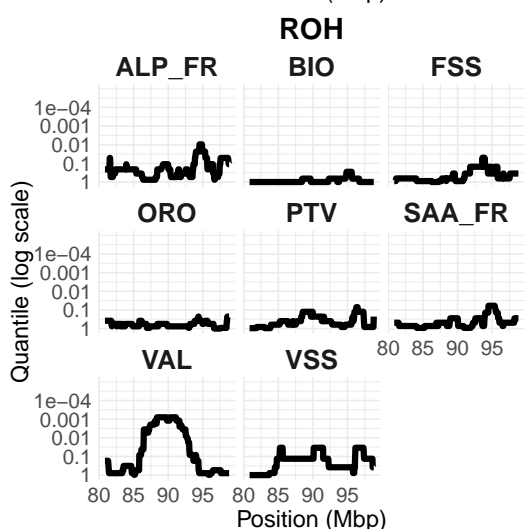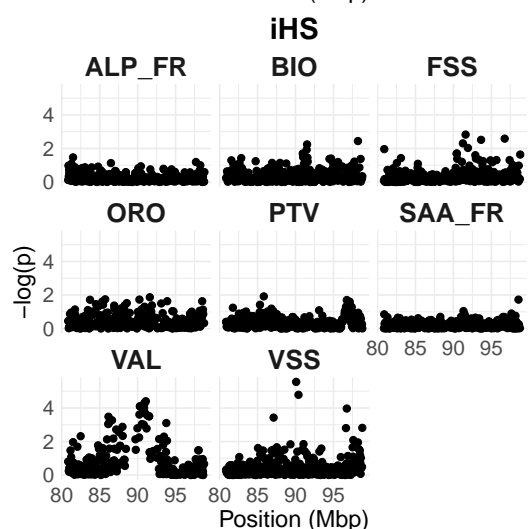

**Alps 10:26650280–28650280**

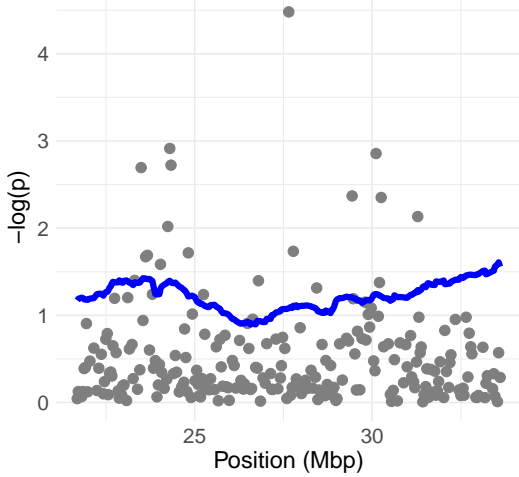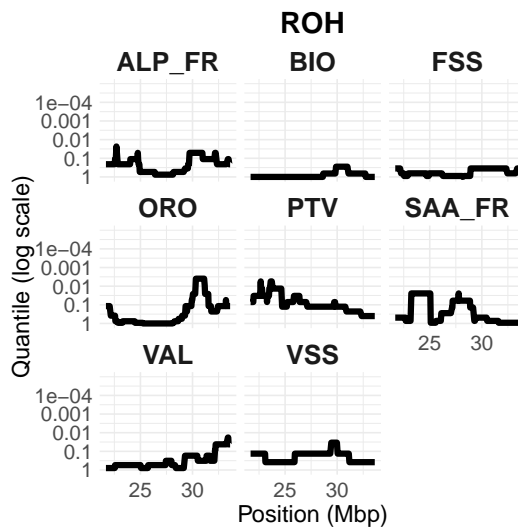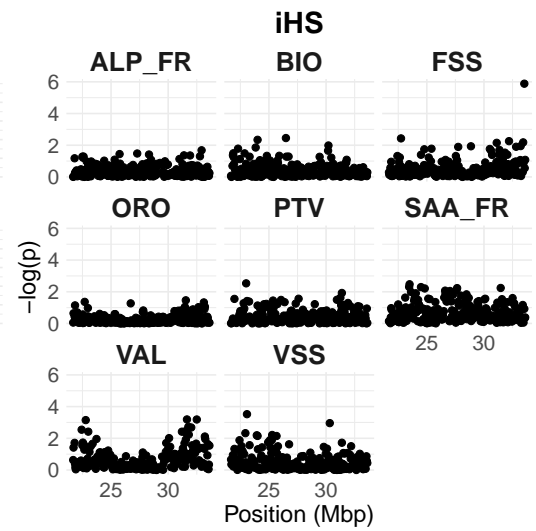

**Alps 13:50164018–52871150**

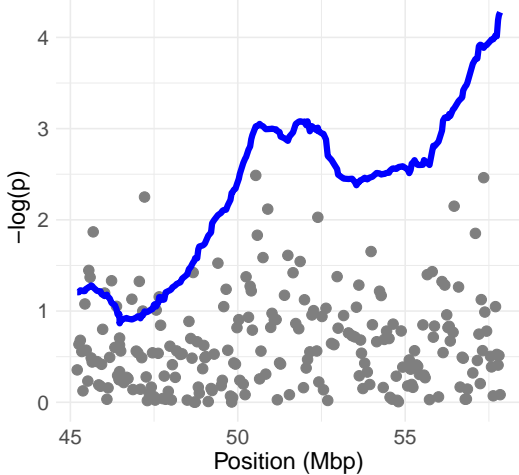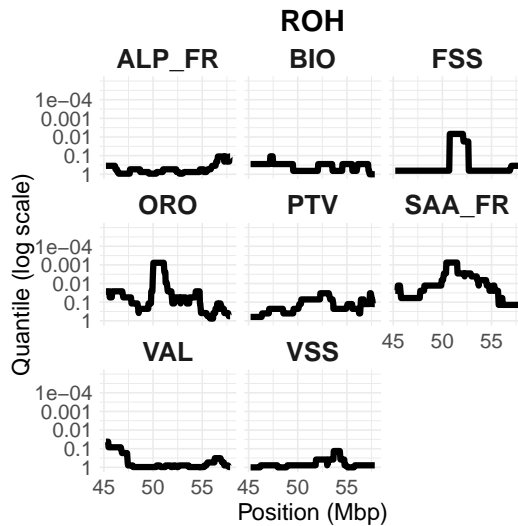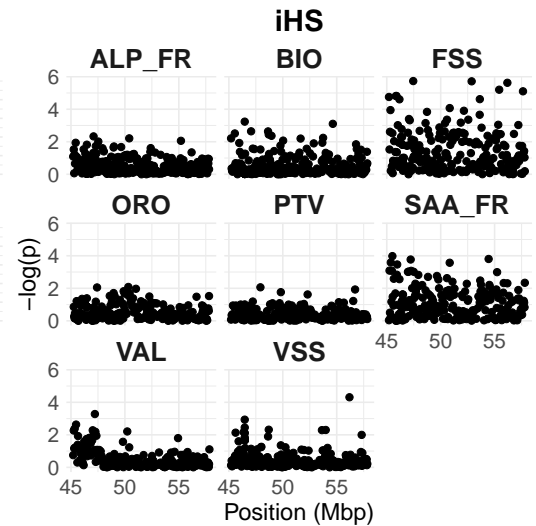

**Alps 13:55195097–68264381**

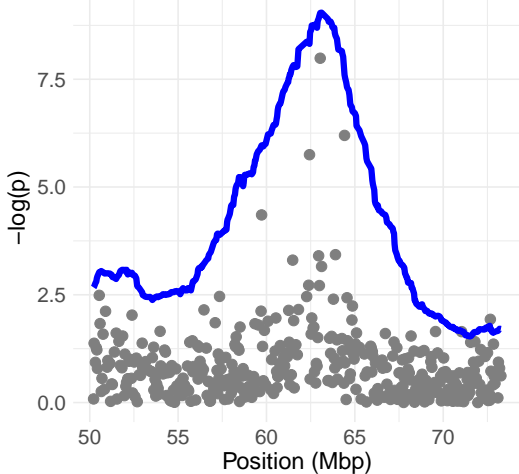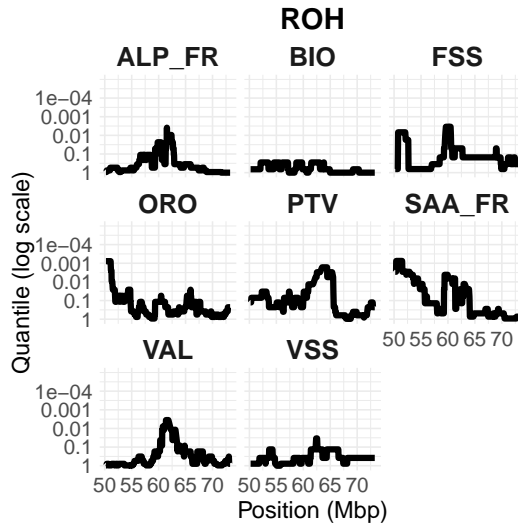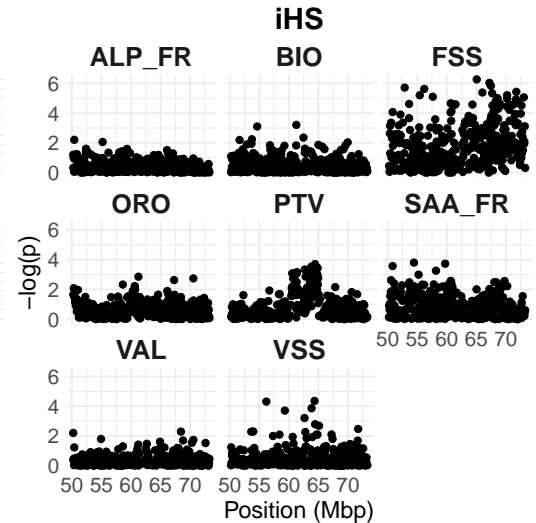

**Alps 14:83528638–85528638**

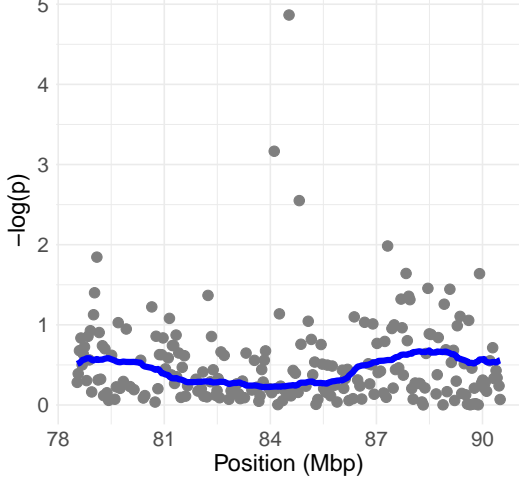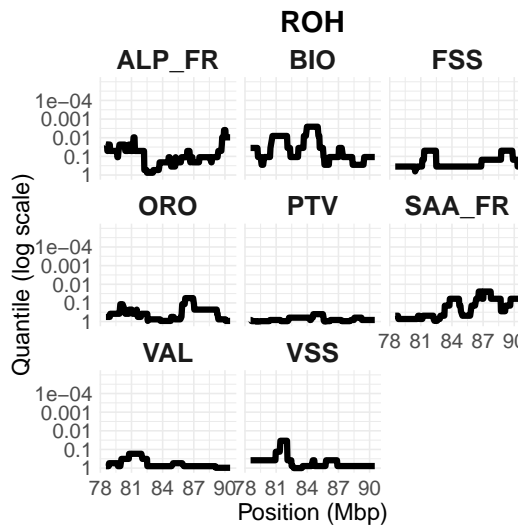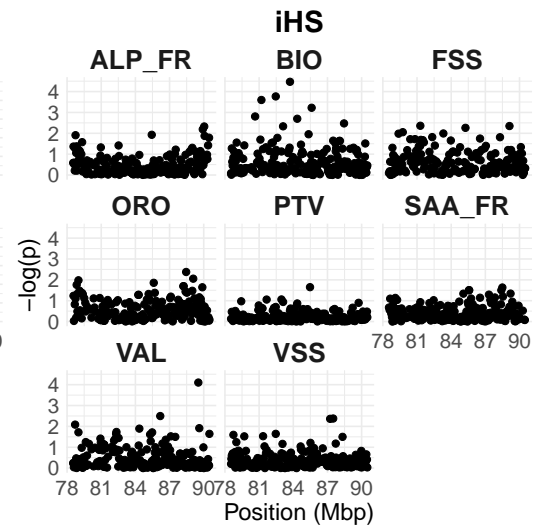

**Alps 24:54147826–57304785**

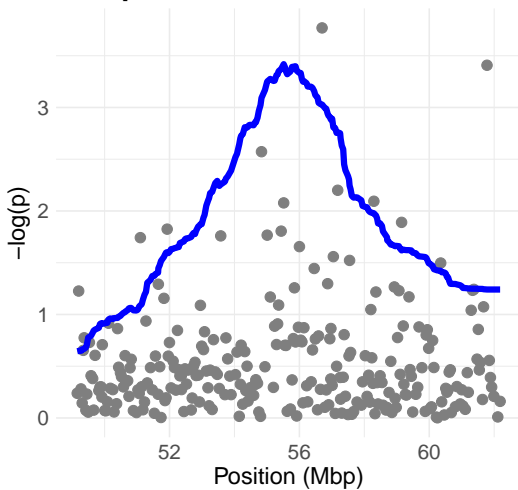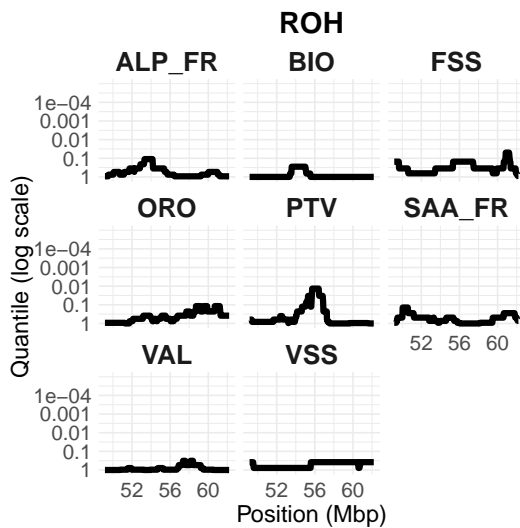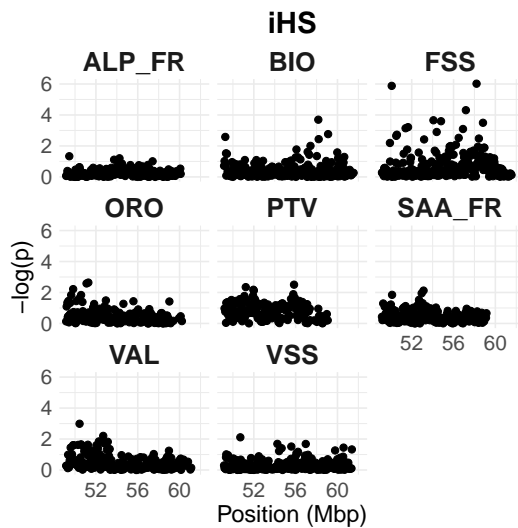

**Angoras 25:35499729–35875779**

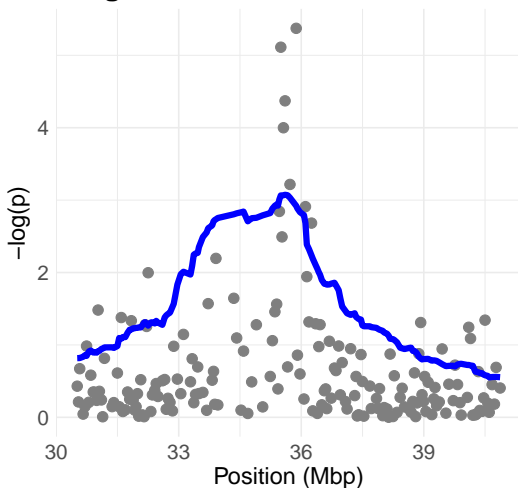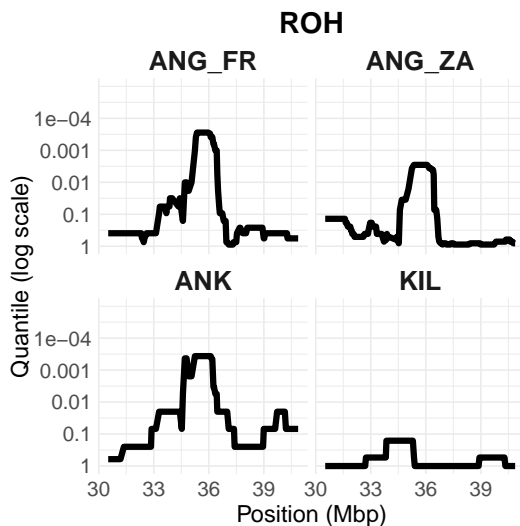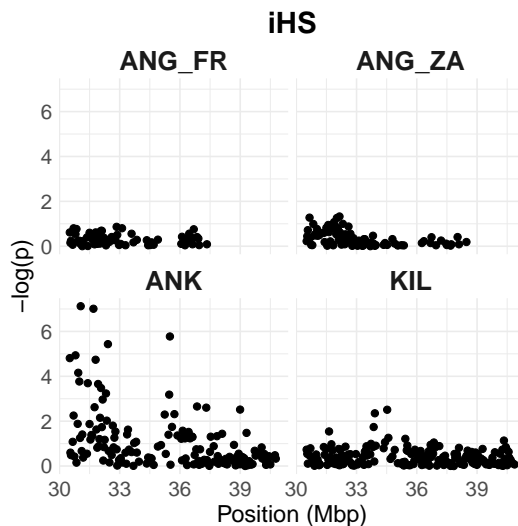

**Boers 3:87639747–89364906**

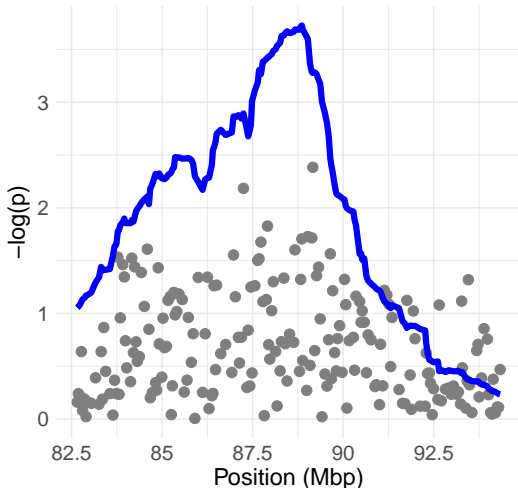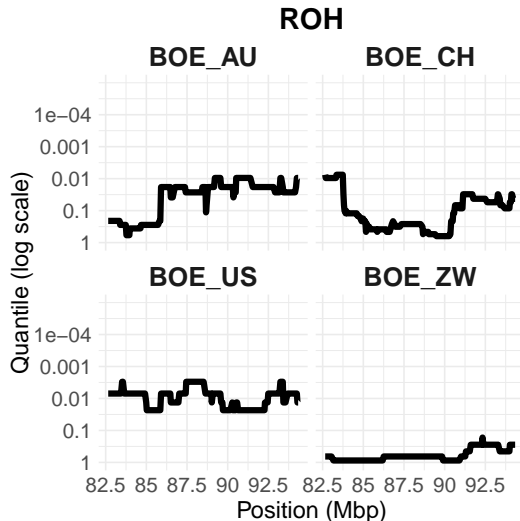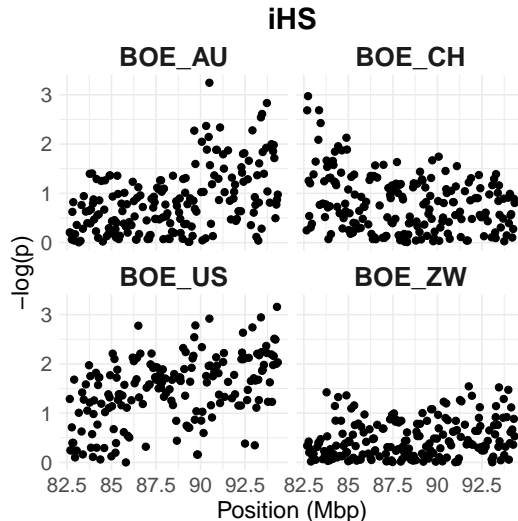

**Boers 15:43352658–43792940**

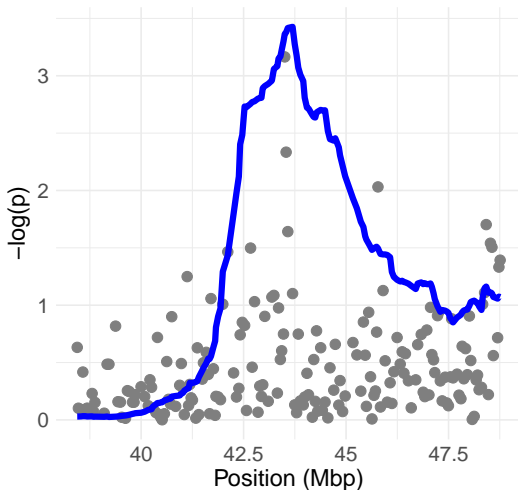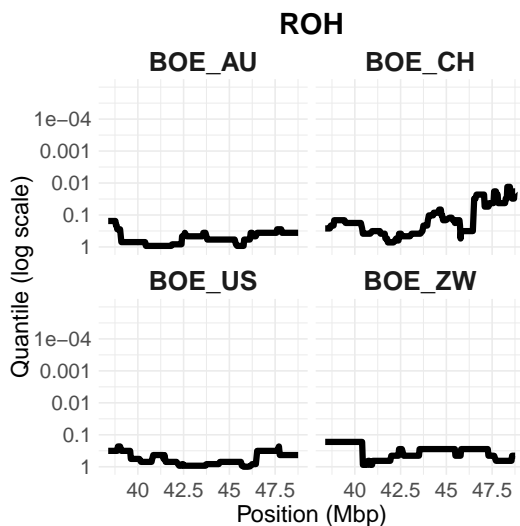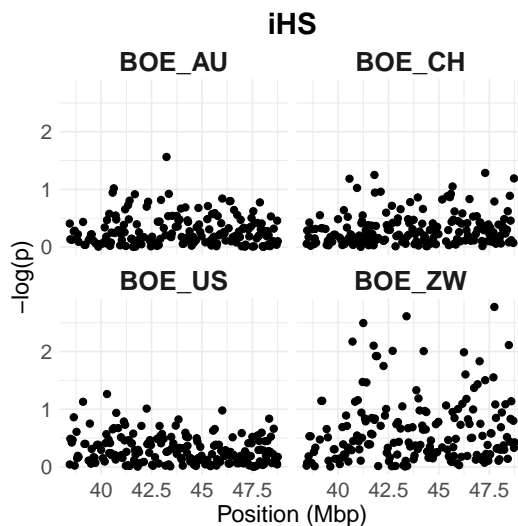

**Boers 18:25071336–28245263**

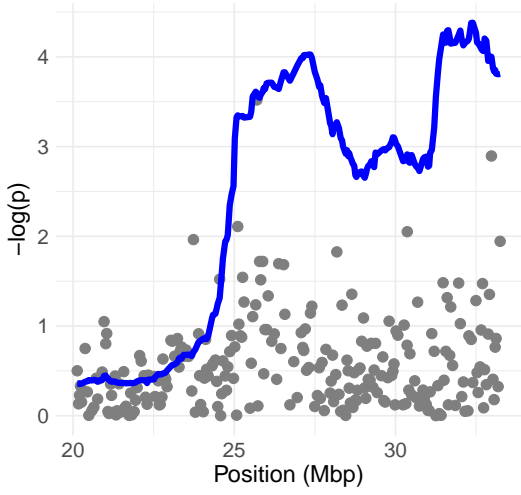

**ROH**

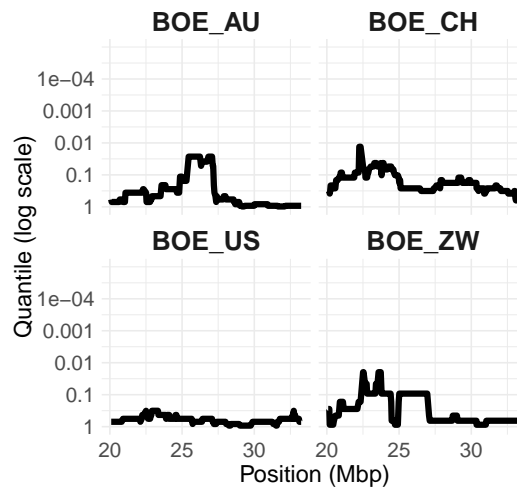

**iHS**

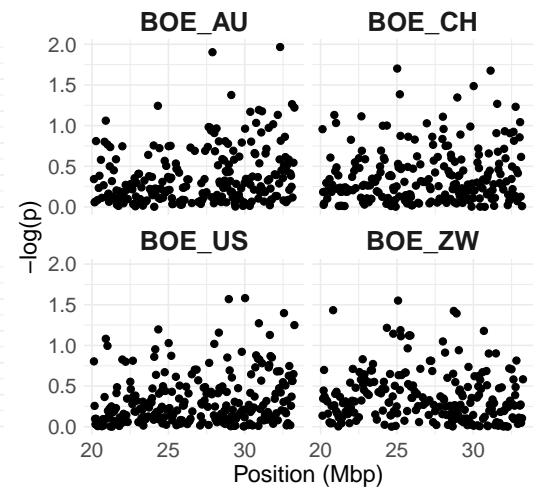

**Boers 18:31198730–35000522**

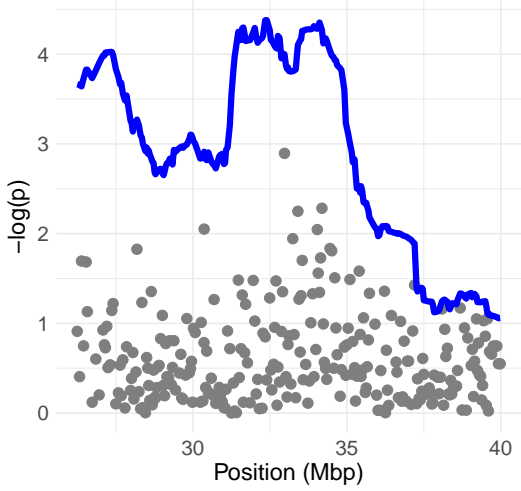

**ROH**

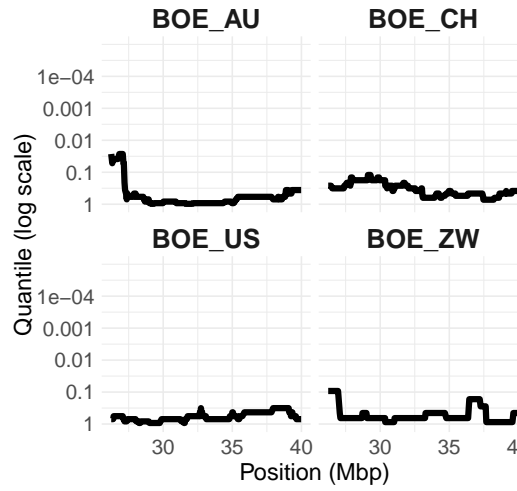

**iHS**

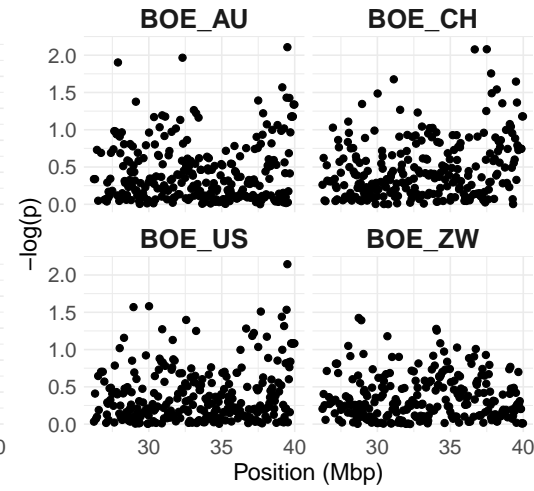

**Boers 22:37656735–40272340**

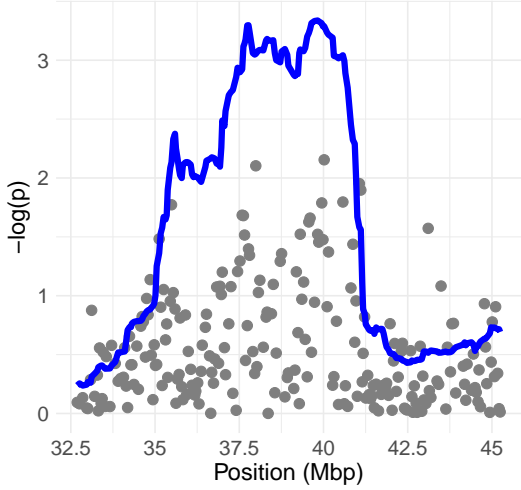

**ROH**

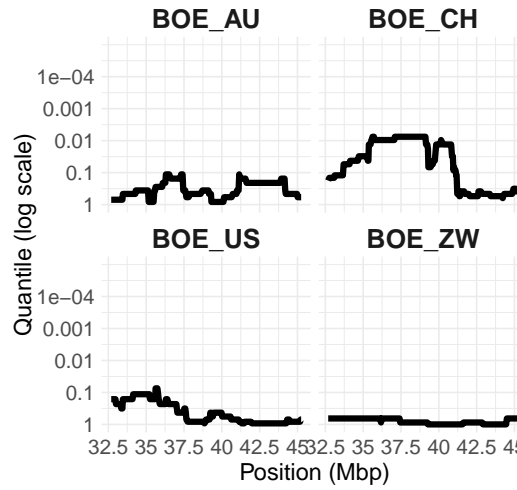

**iHS**

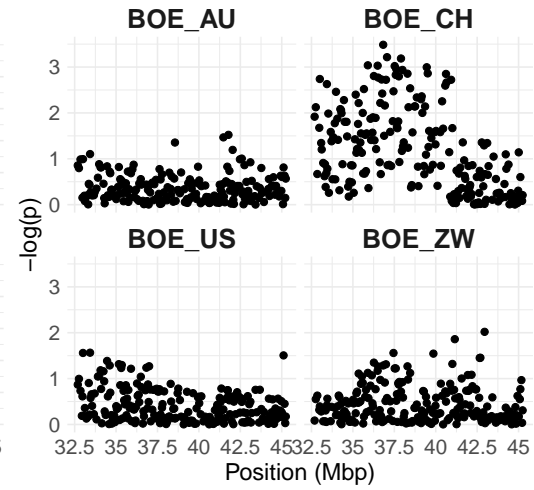

**CentralAsia 6:69276841–72152335**

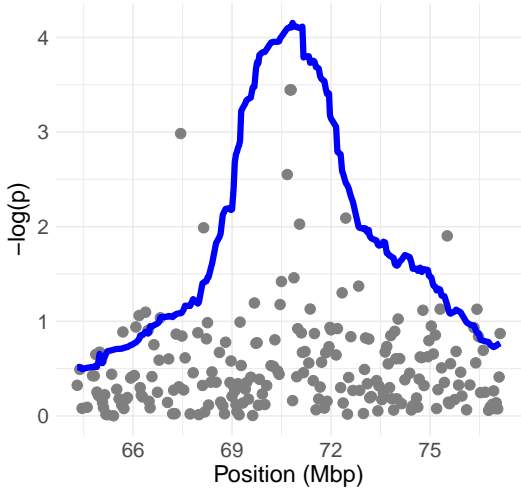

**ROH**

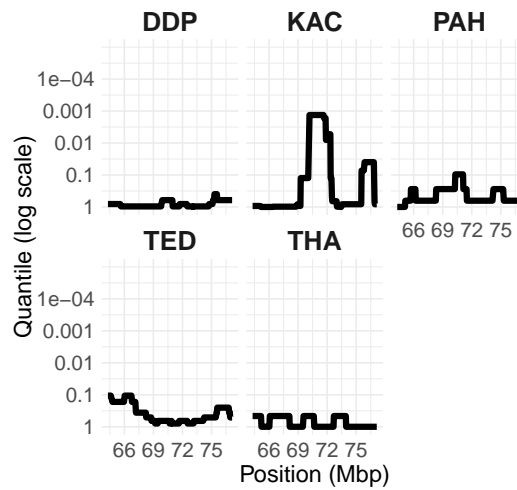

**iHS**

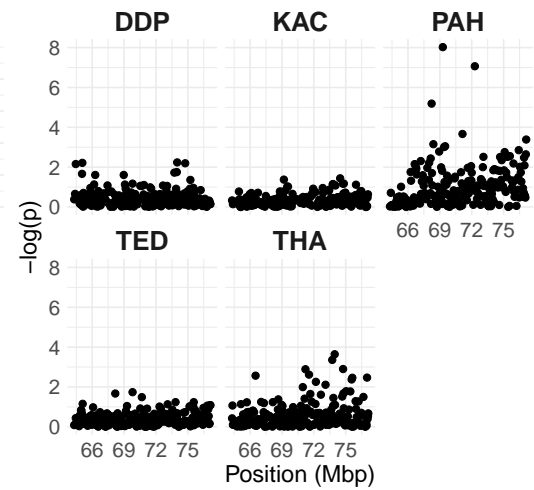

**CentralAsia 10:35064301–41683768**

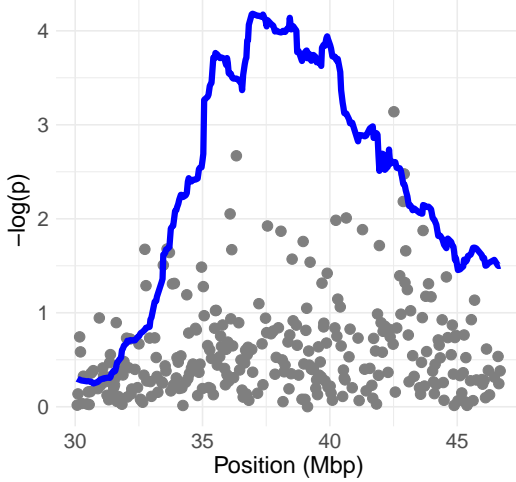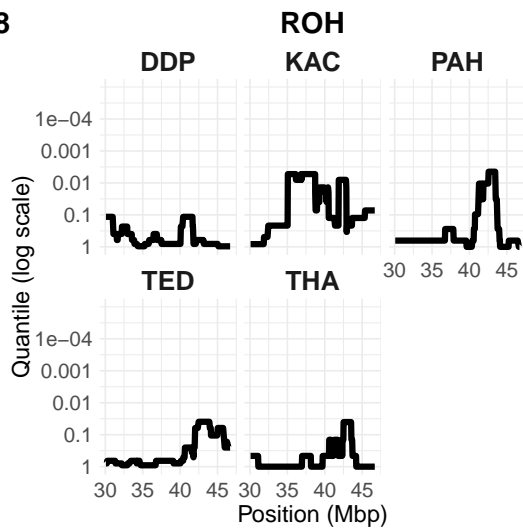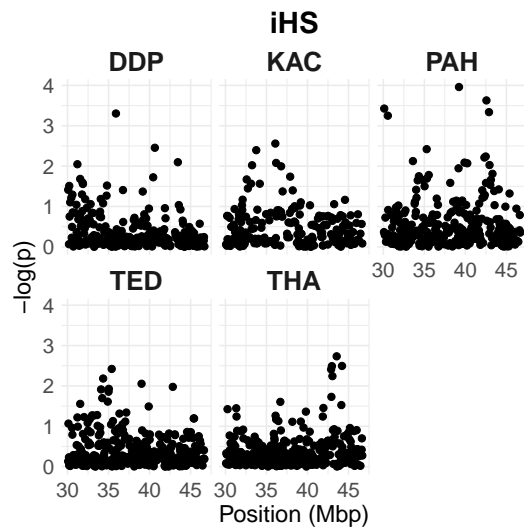

**CentralAsia 12:57217560–57876029**

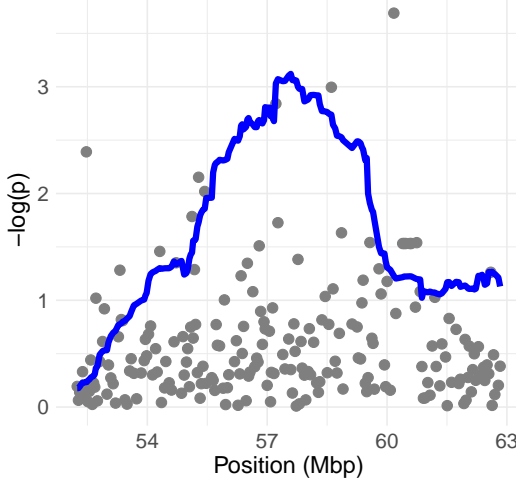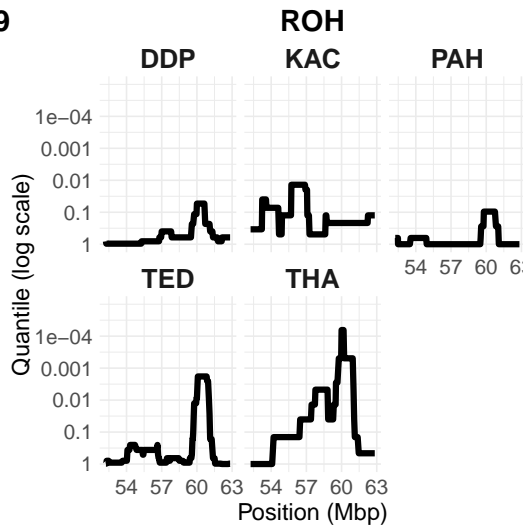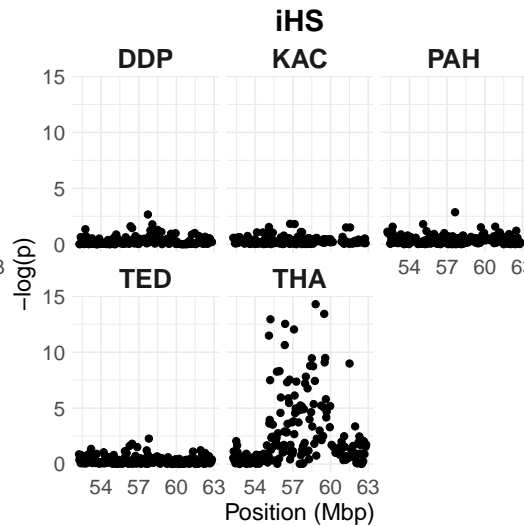

**CentralAsia 13:60601288–65827525**

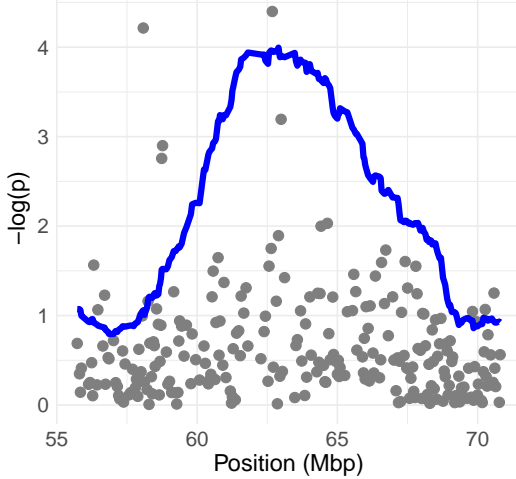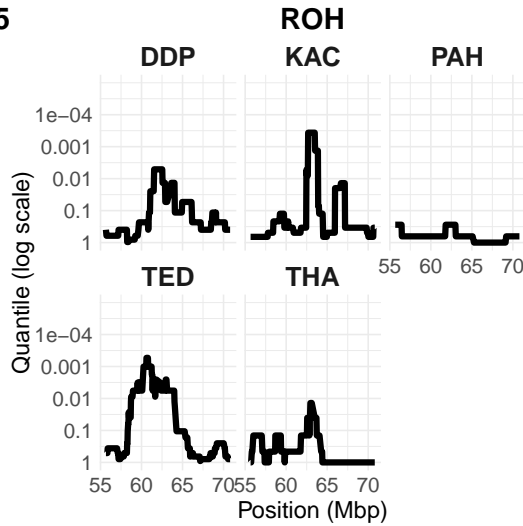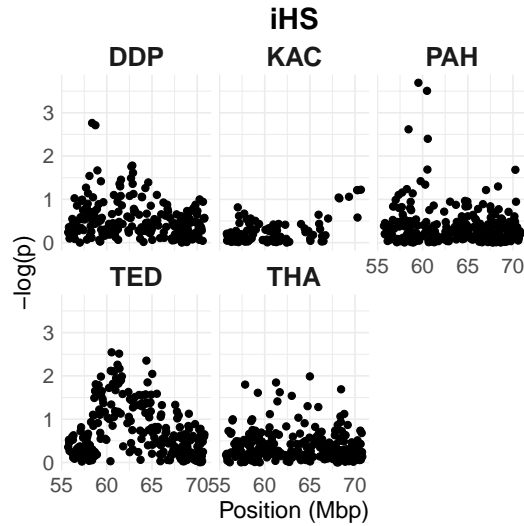

**EastAfrica 6:44625340–46625340**

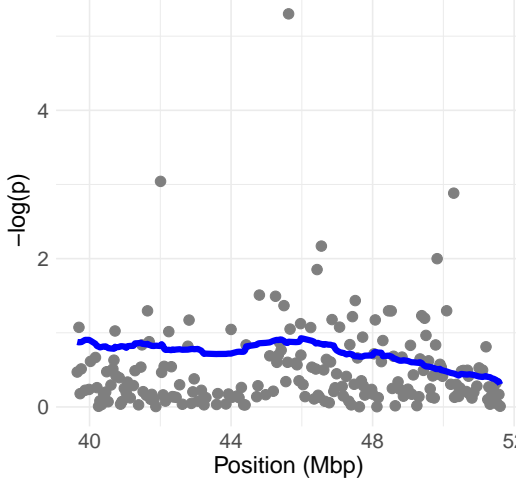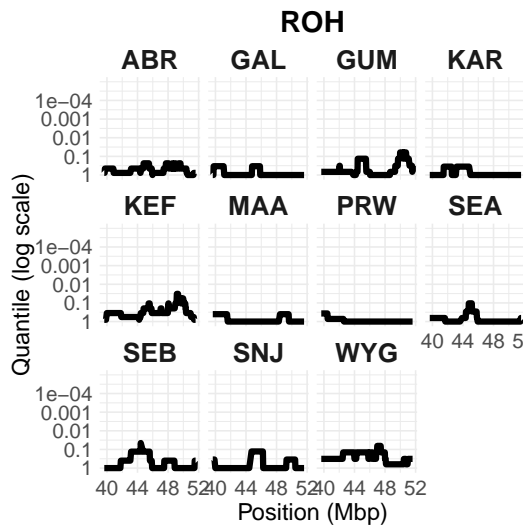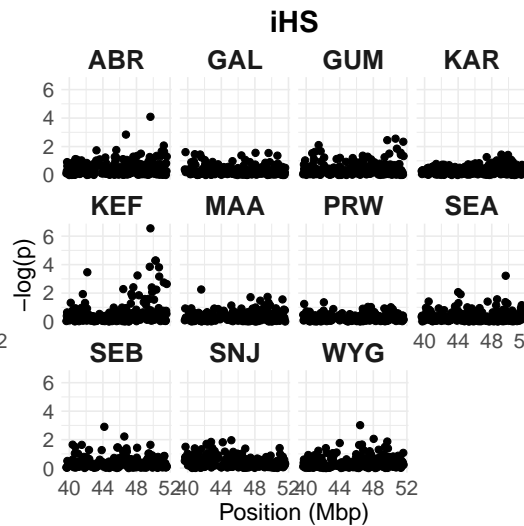

**EastAfrica 6:70758117–70788808**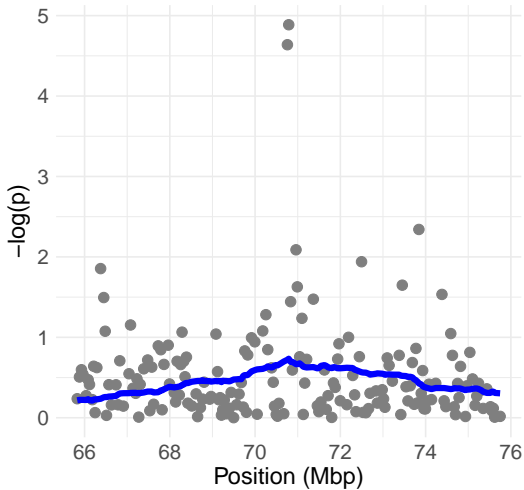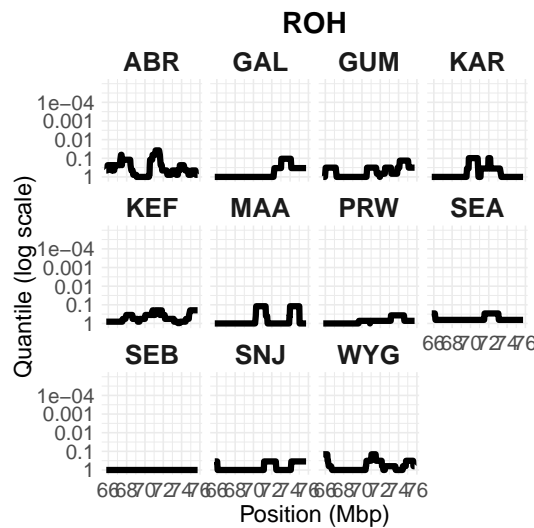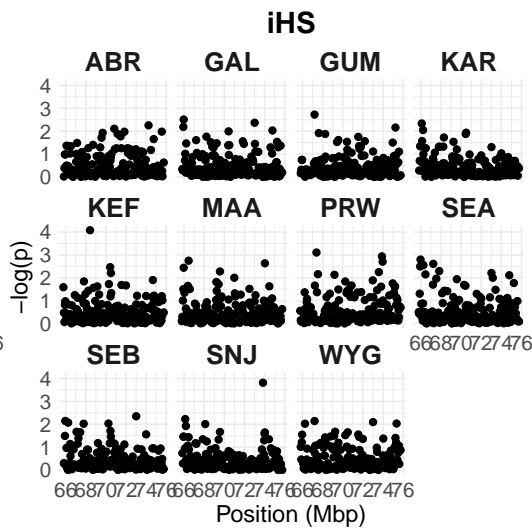**EastAfrica 6:84532845–86532845**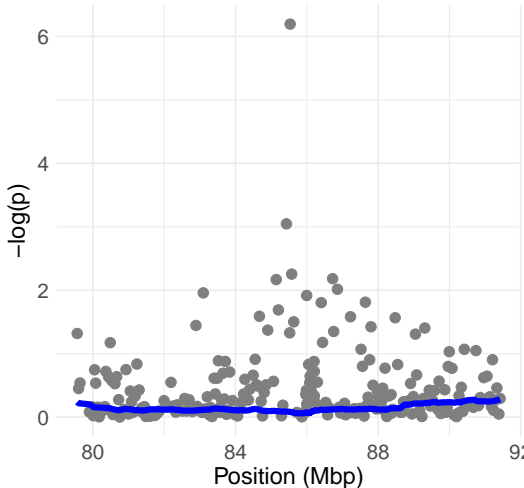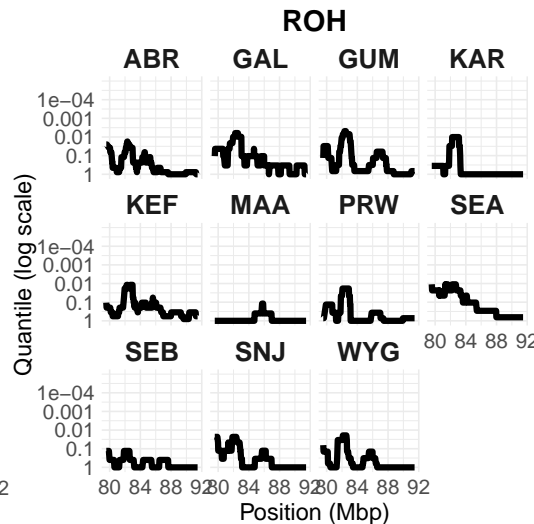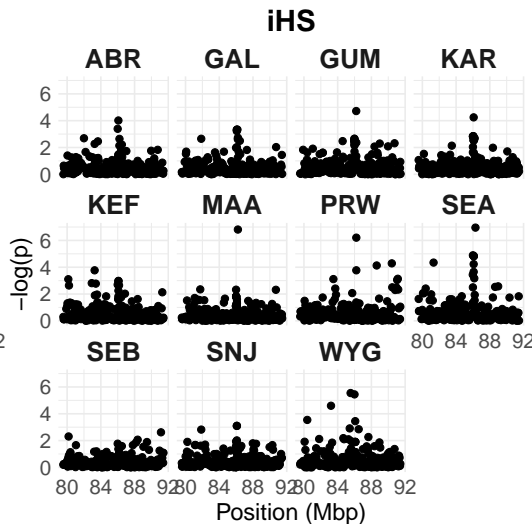**EastAfrica 13:60744929–62744929**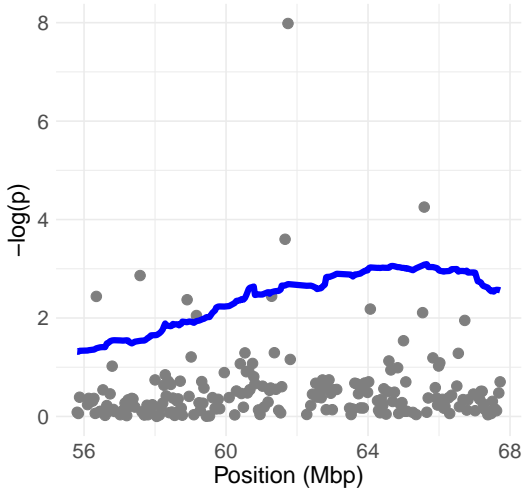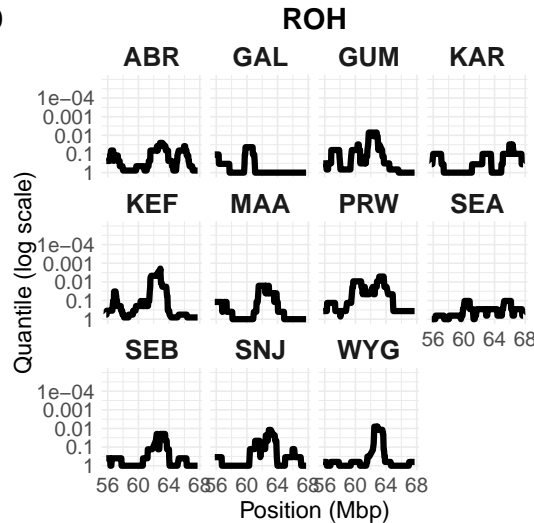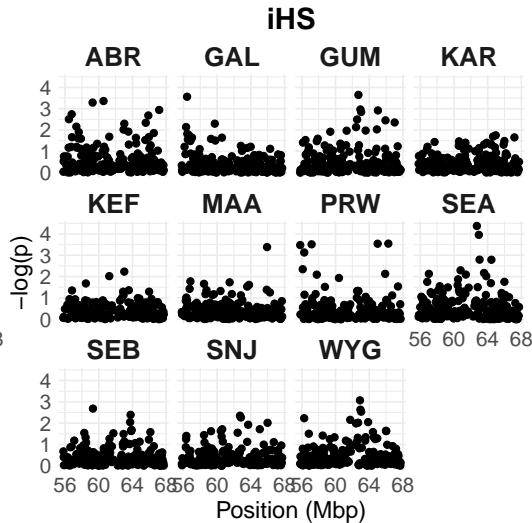**EastAfrica 16:9665432–11665432**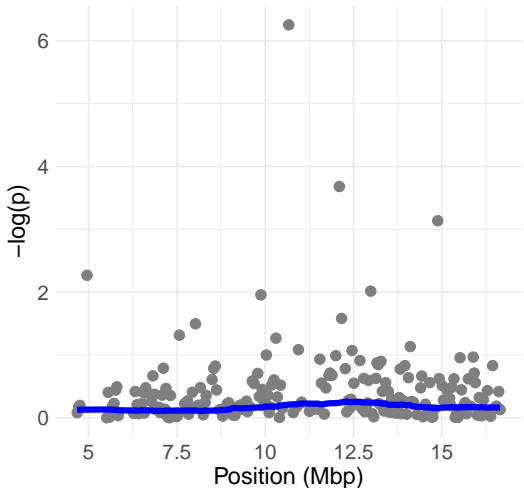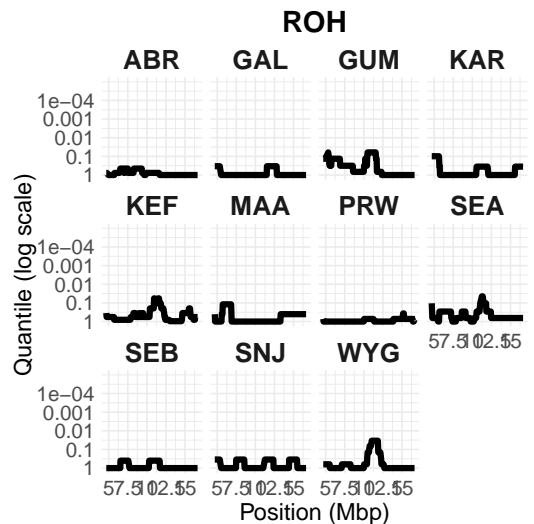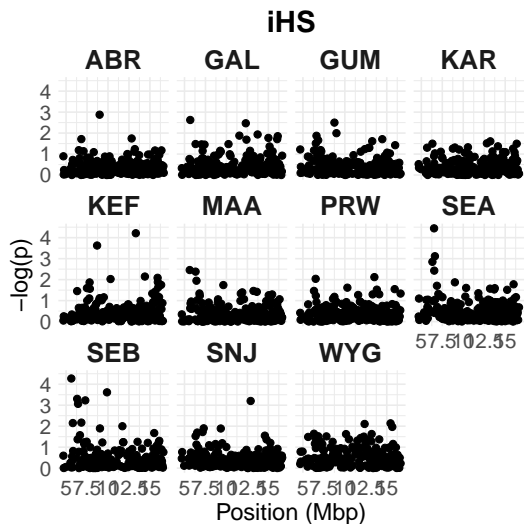

**EastAfrica 21:18565570–20565570**

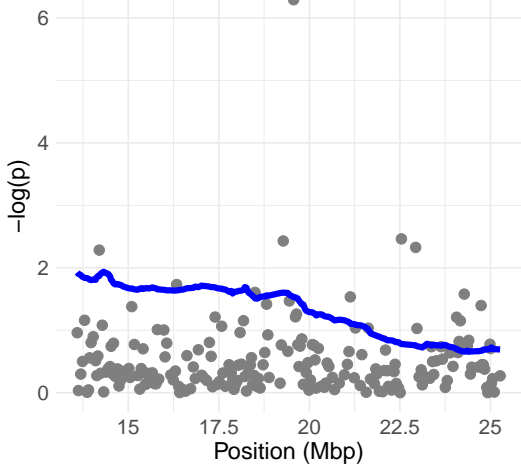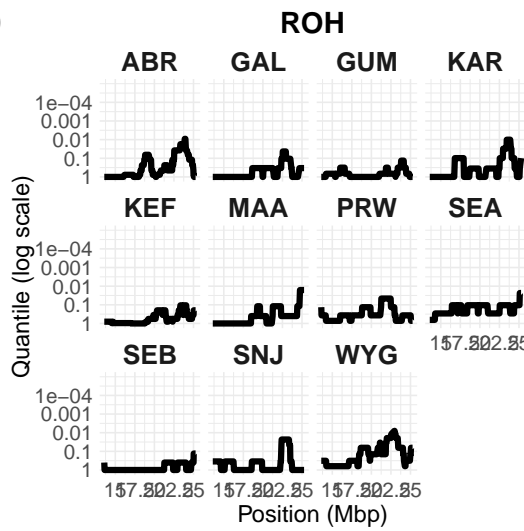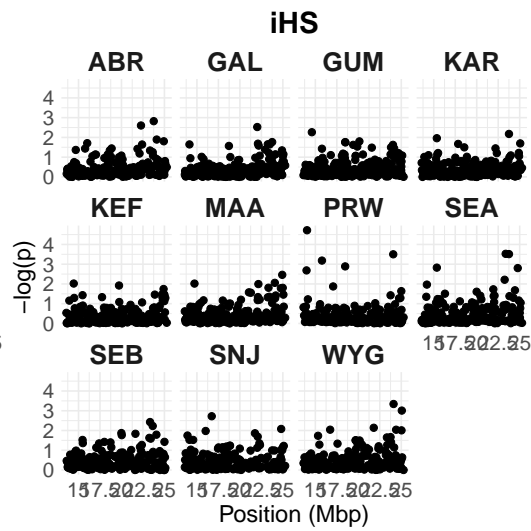

**EastAfrica 23:11699427–13699427**

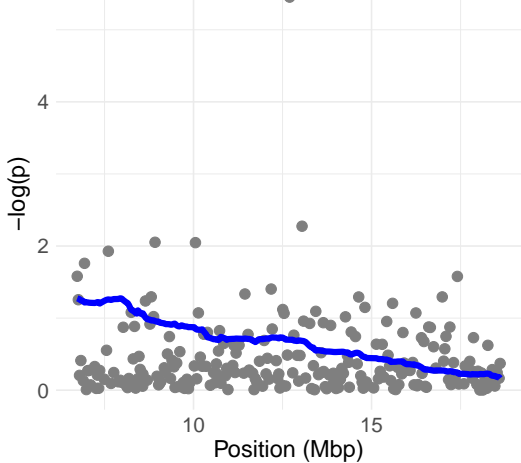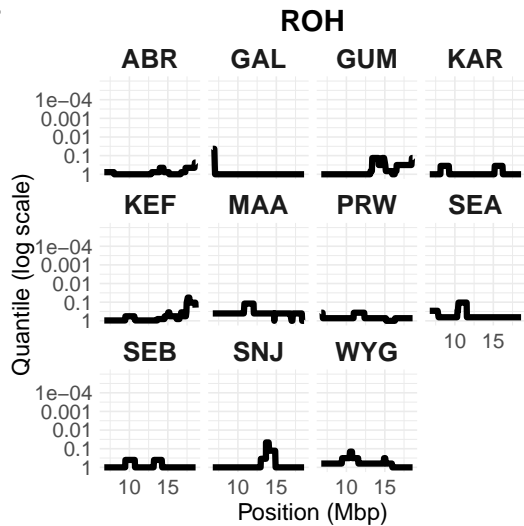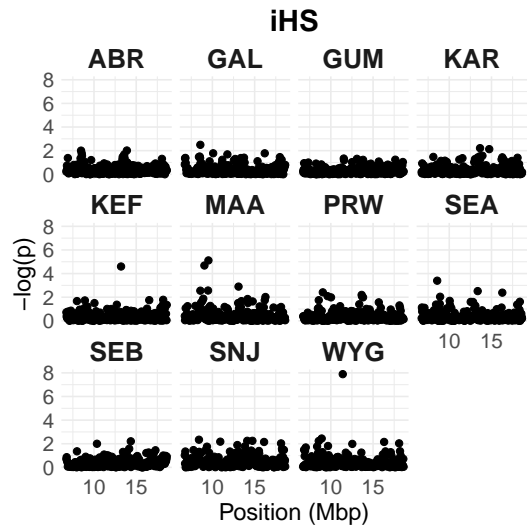

**Egypt 2:48414819–50414819**

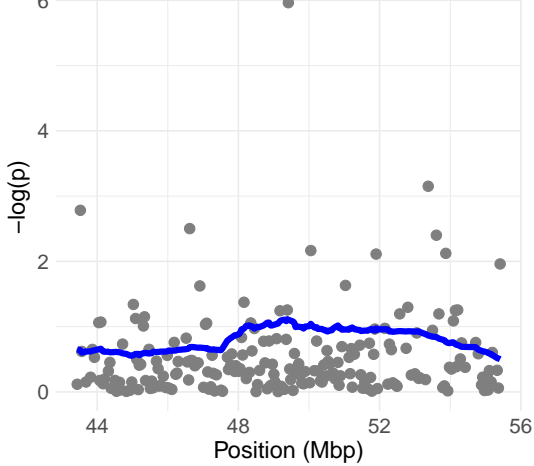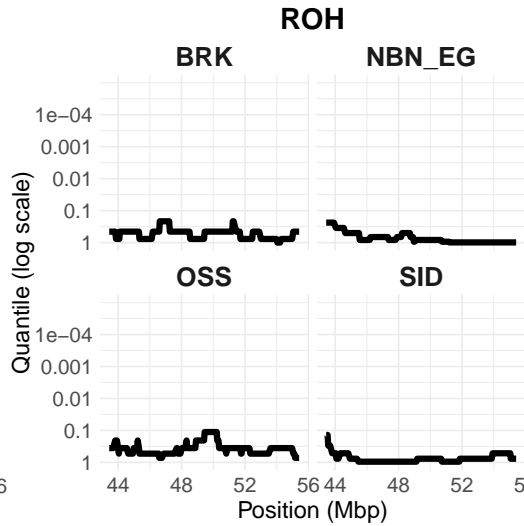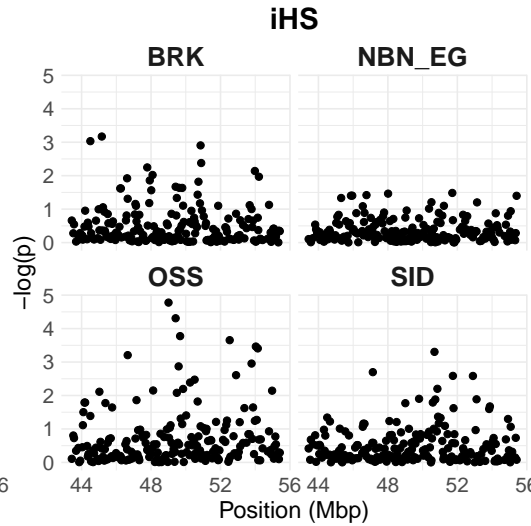

**Egypt 5:105348578–114048603**

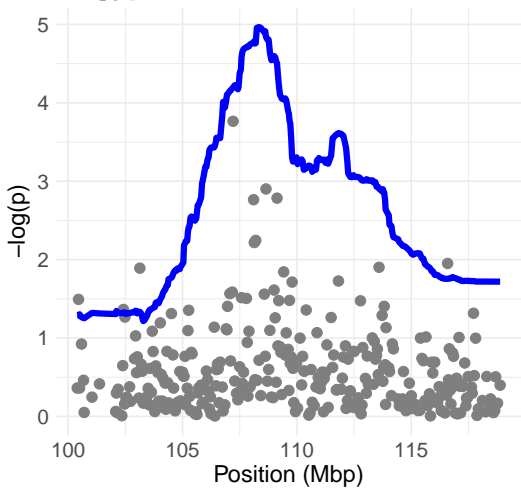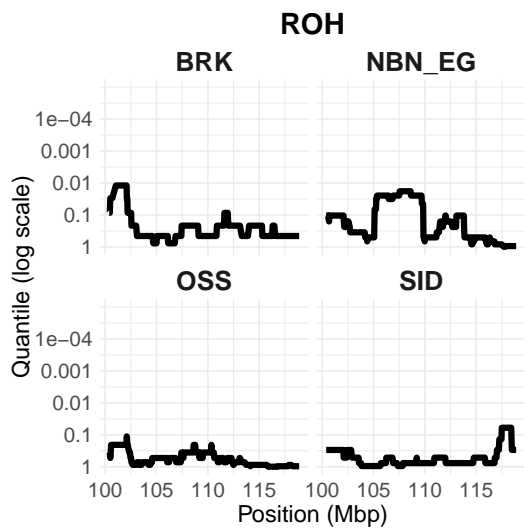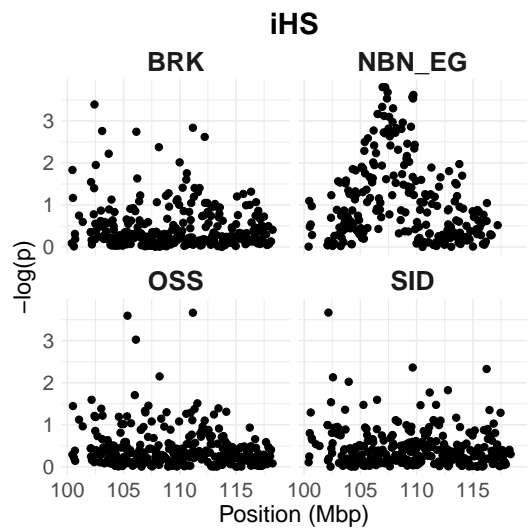

**Egypt 6:12273179–14699830**

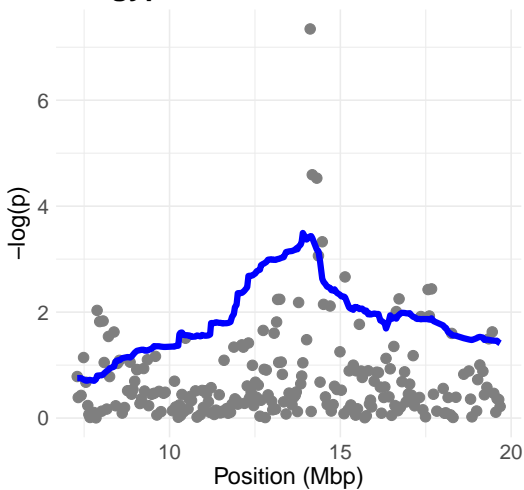

**ROH**

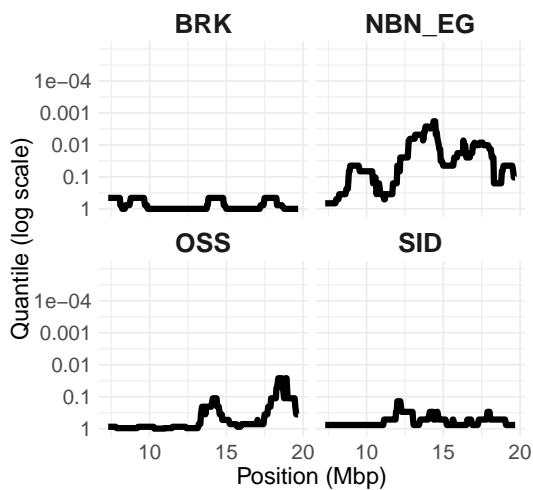

**iHS**

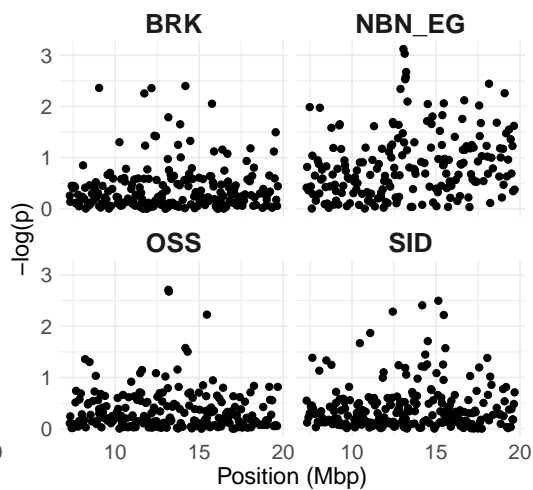

**Egypt 6:26839183–56407325**

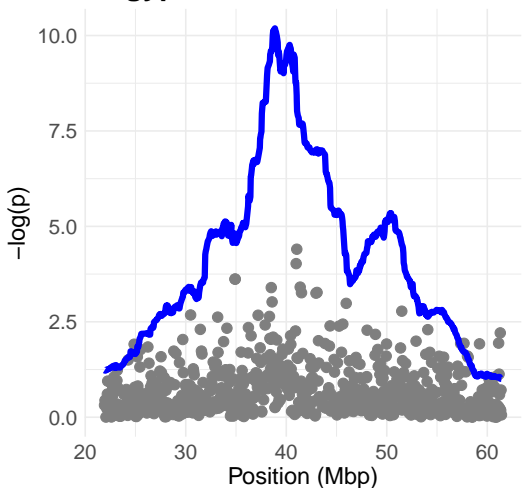

**ROH**

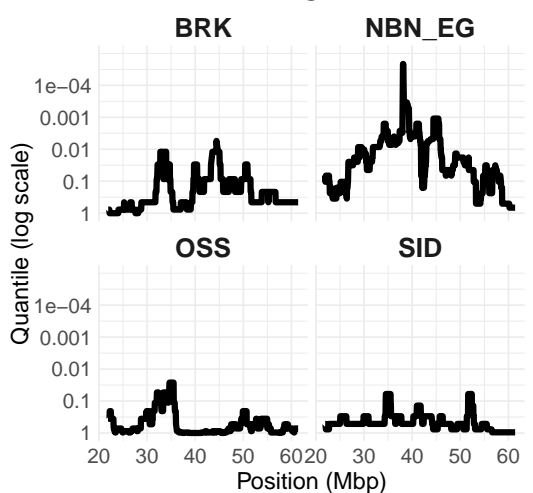

**iHS**

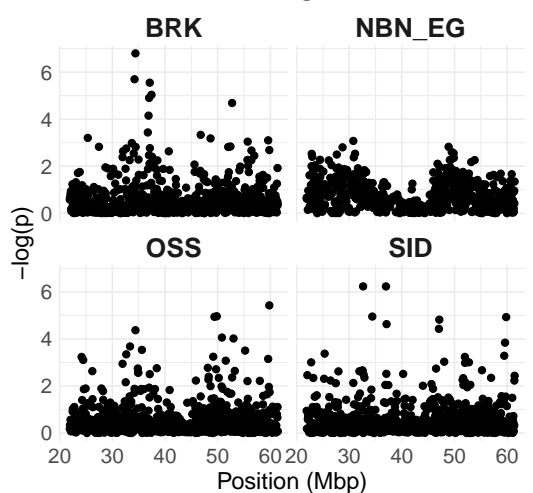

**Egypt 16:4722376–8699610**

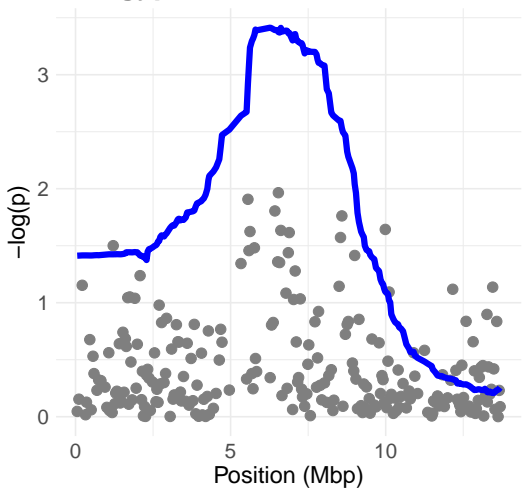

**ROH**

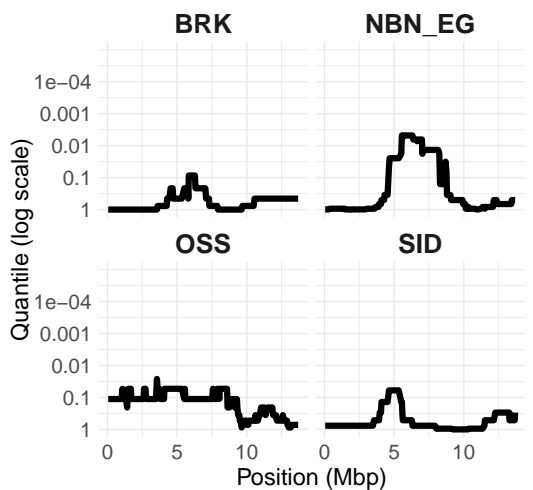

**iHS**

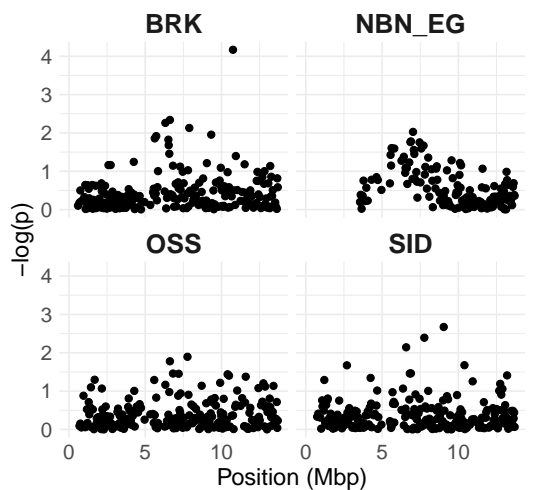

**Egypt 25:17956639–22233001**

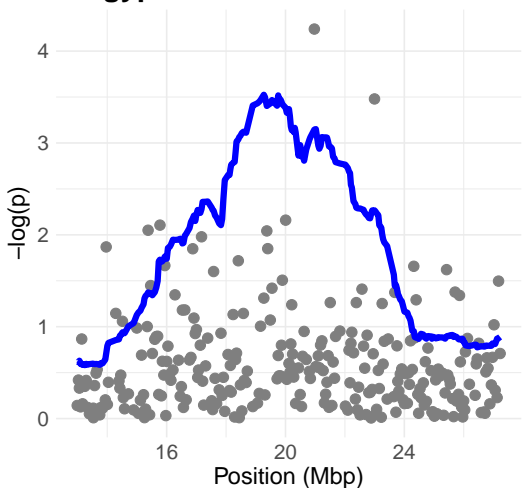

**ROH**

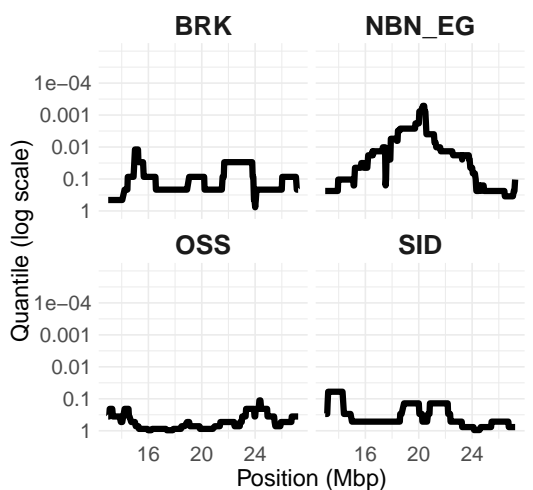

**iHS**

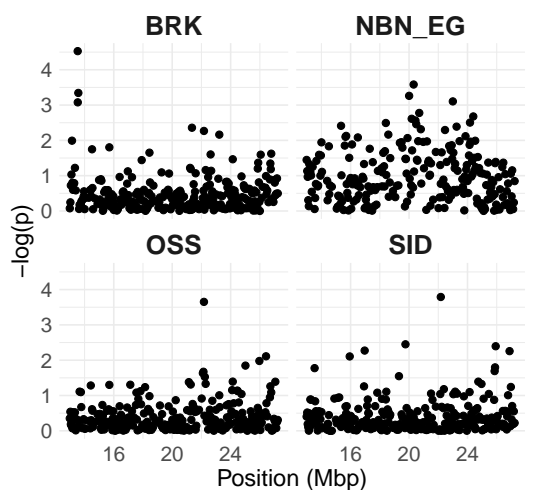



**NorthWestAfrica 3:109932435–111932435**

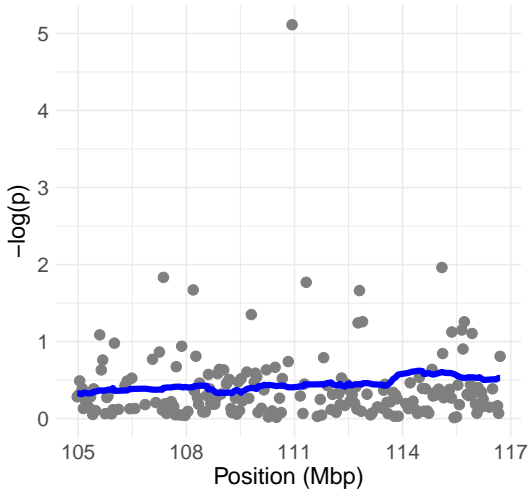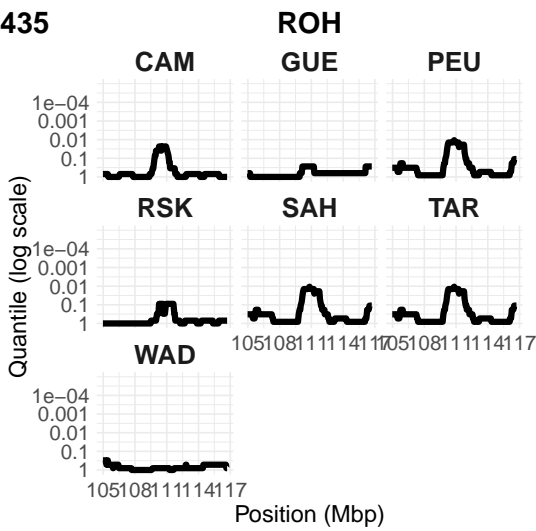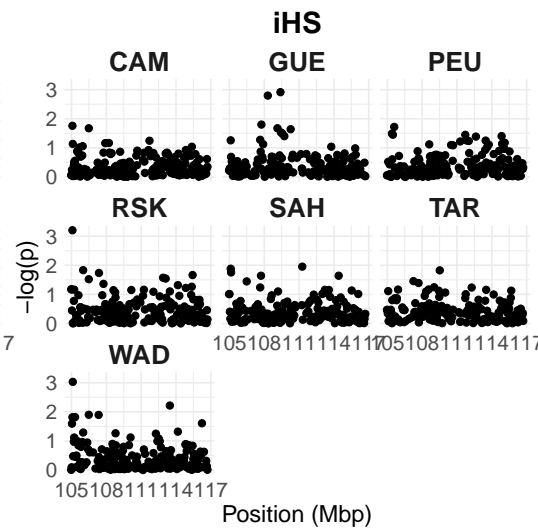

**NorthWestAfrica 4:72141822–74141822**

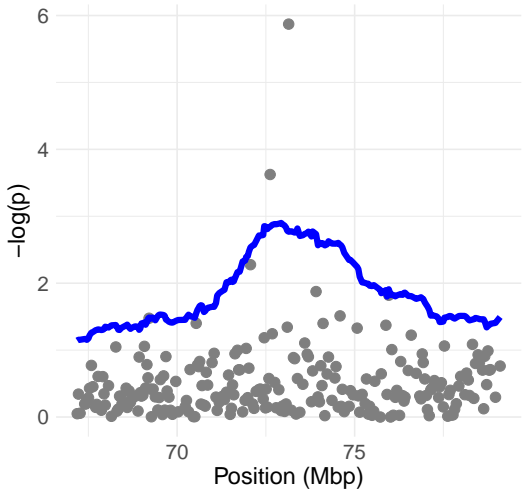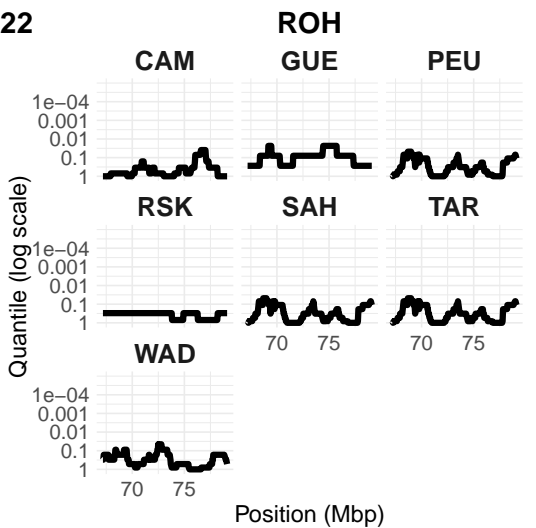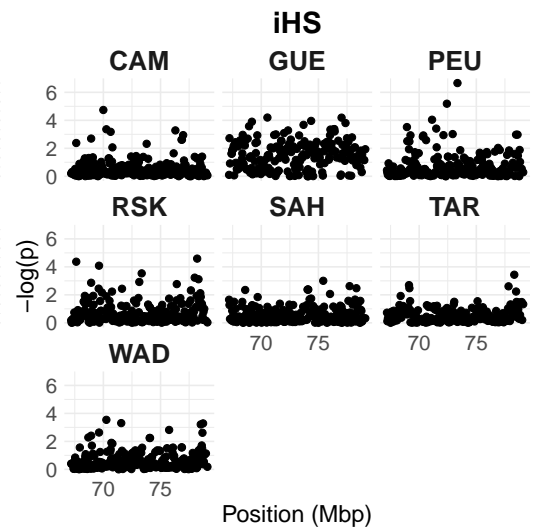

**NorthWestAfrica 5:21547109–24855824**

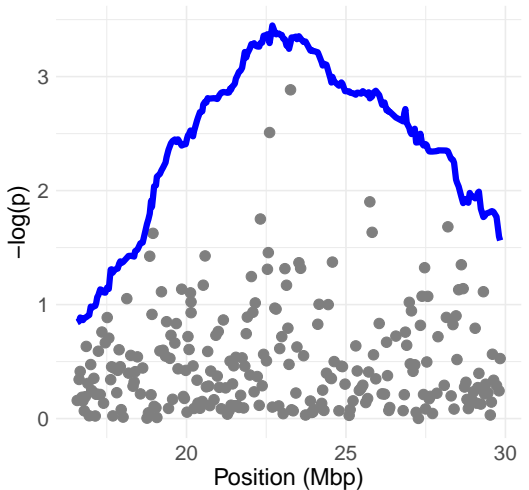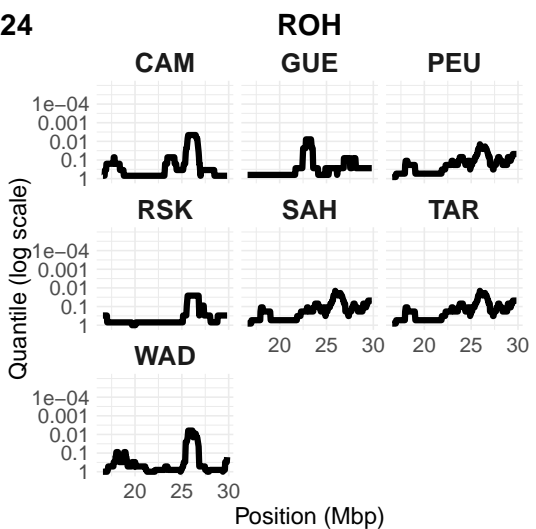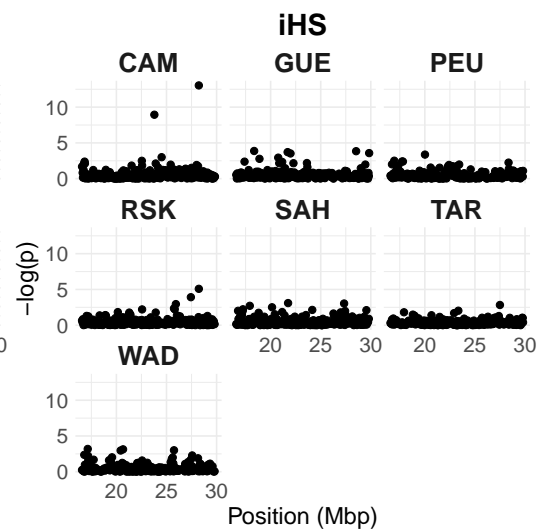

**NorthWestAfrica 5:34522975–41204720**

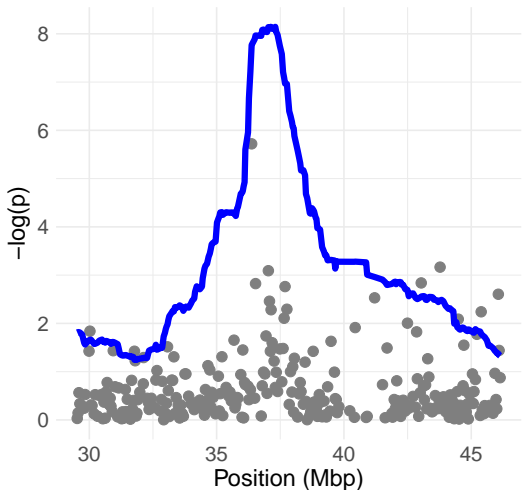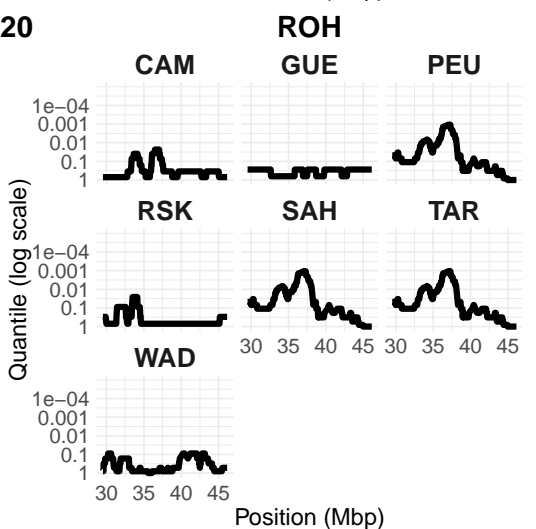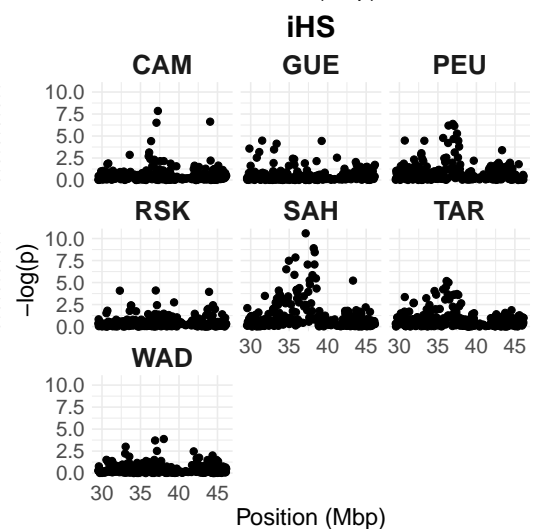

### NorthWestAfrica 6:44596401–46596401

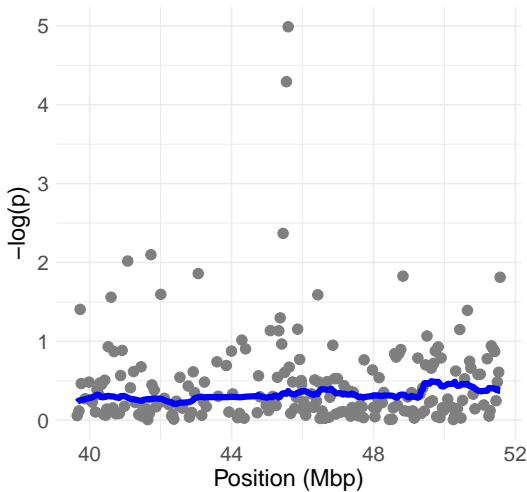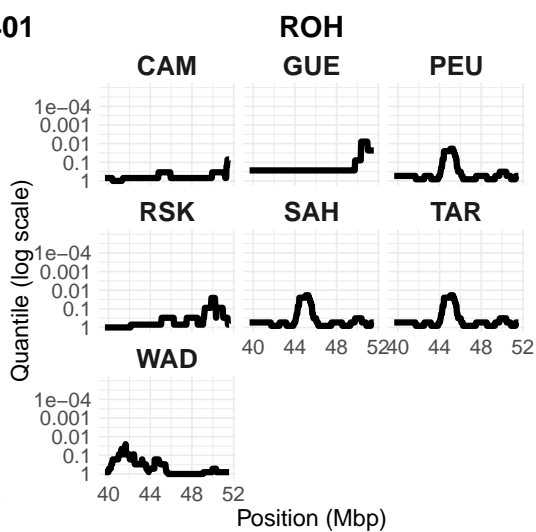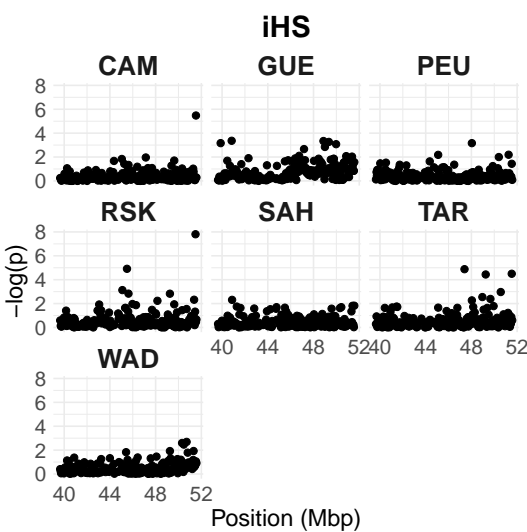

### NorthWestAfrica 10:62054442–71807740

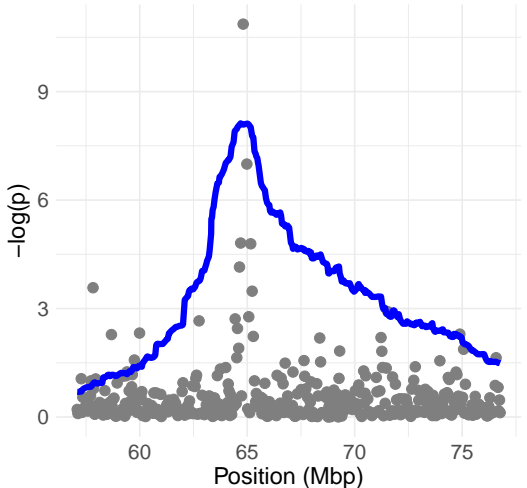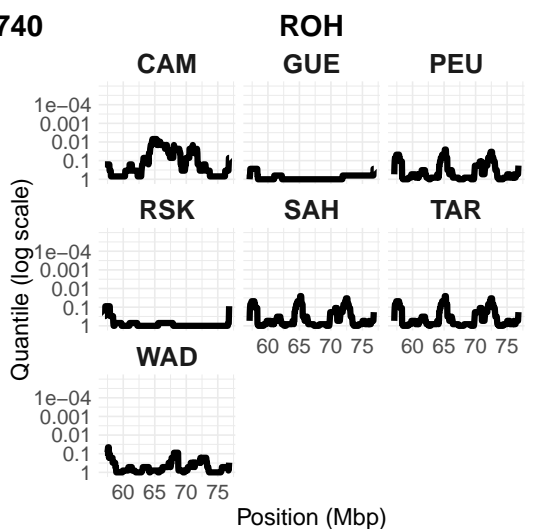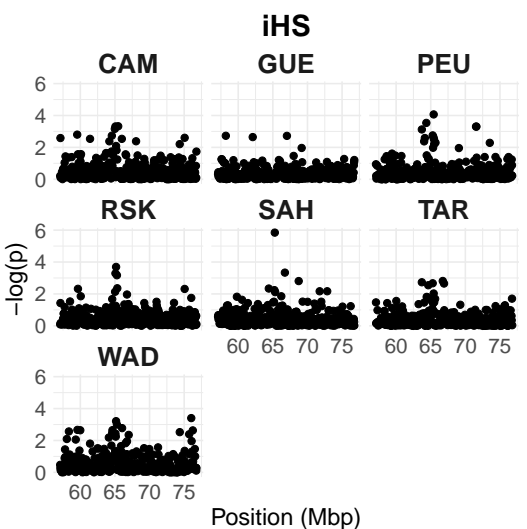

### SouthAfrica 1:3966539–7779682

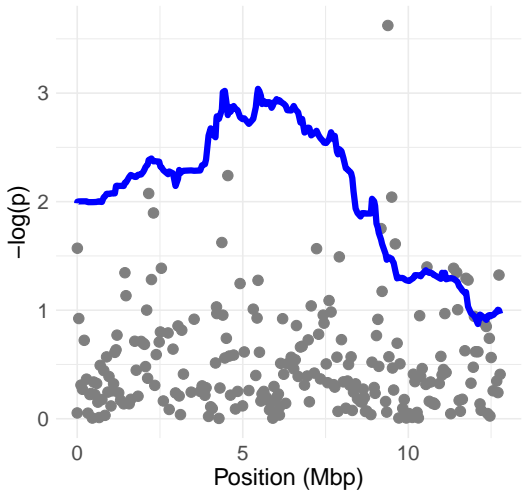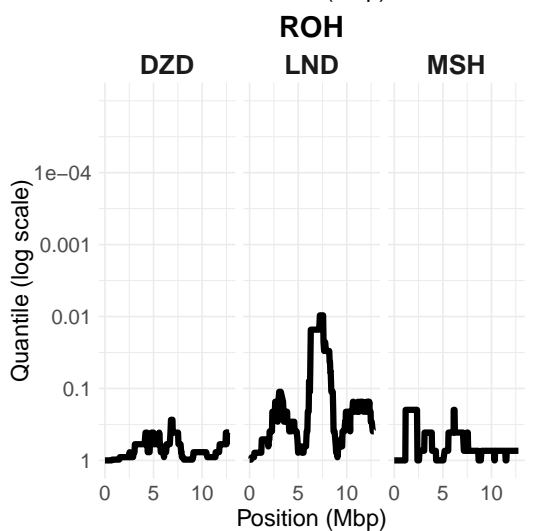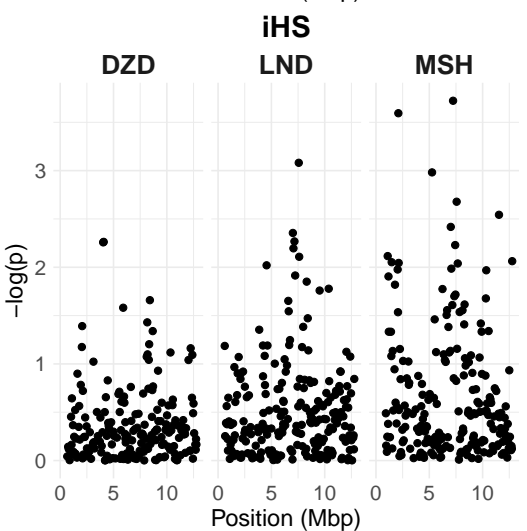

### SouthAfrica 1:93356538–95356538

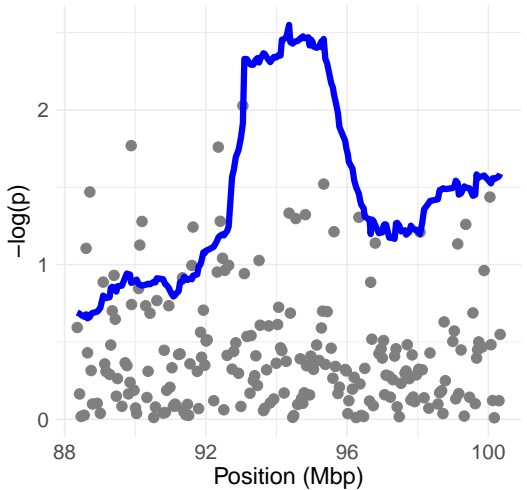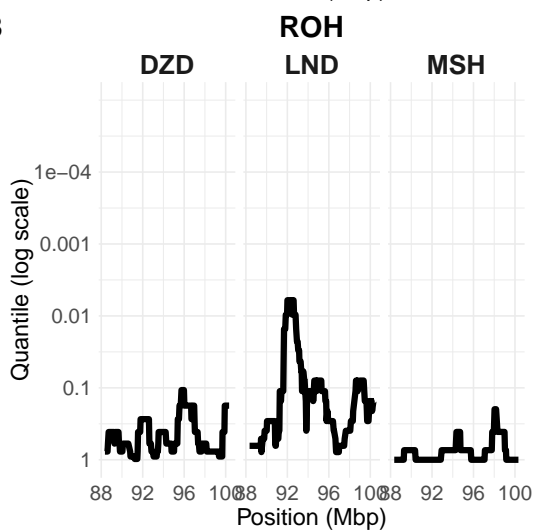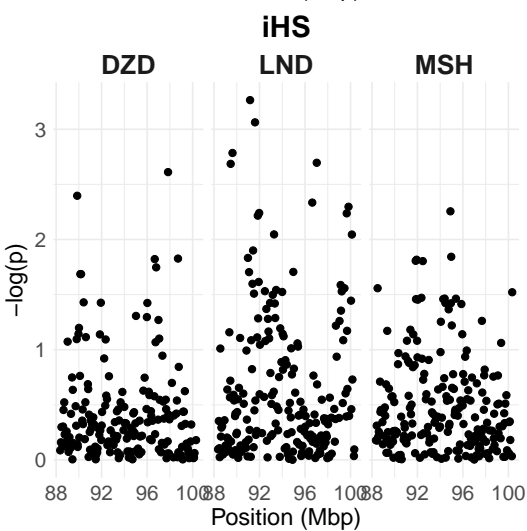

**SouthAfrica 7:59341407–64948071**

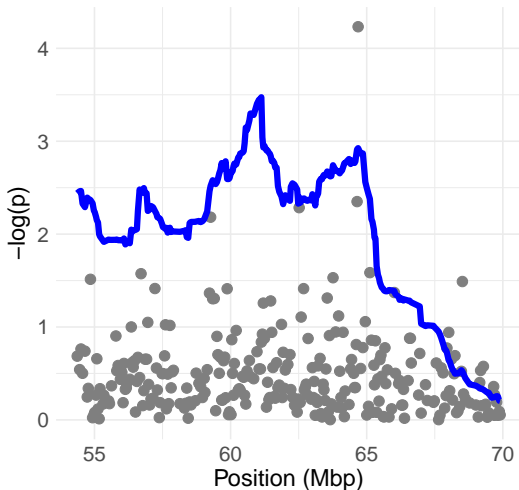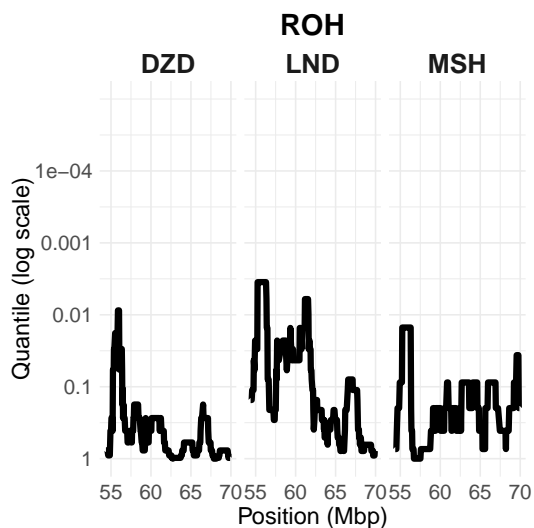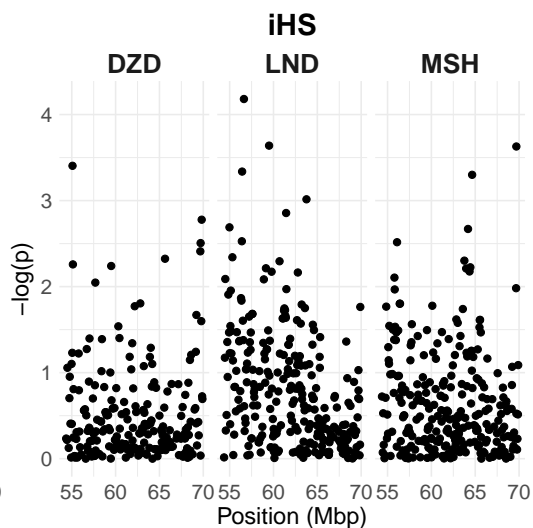

**SouthAfrica 17:46054408–49062316**

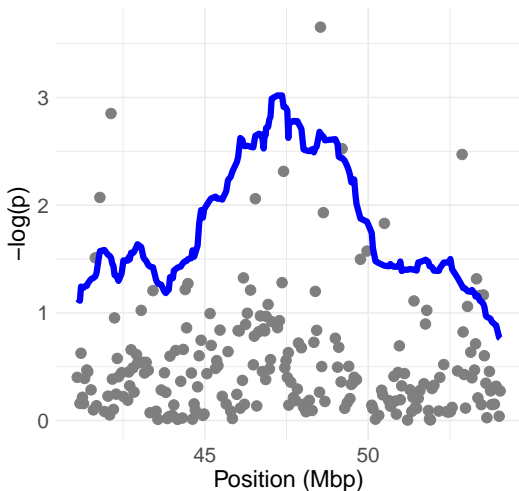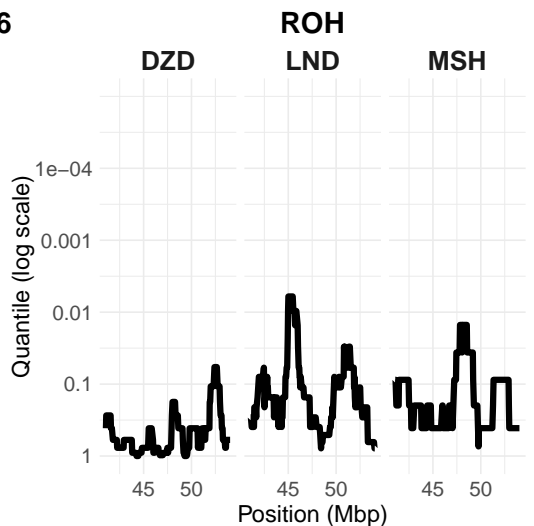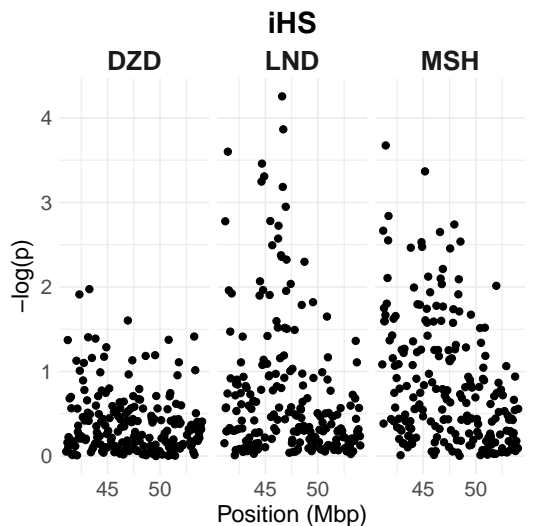

**SouthAfrica 18:52729206–54627639**

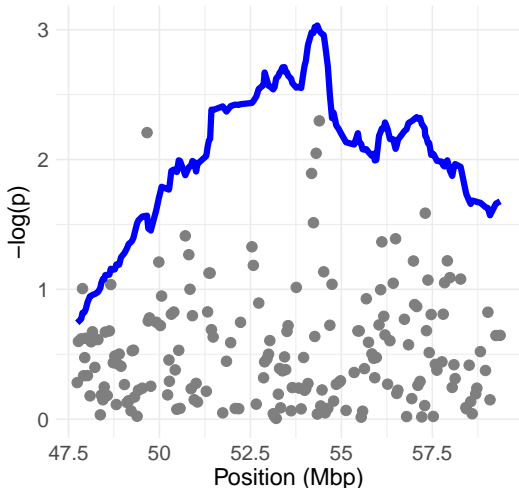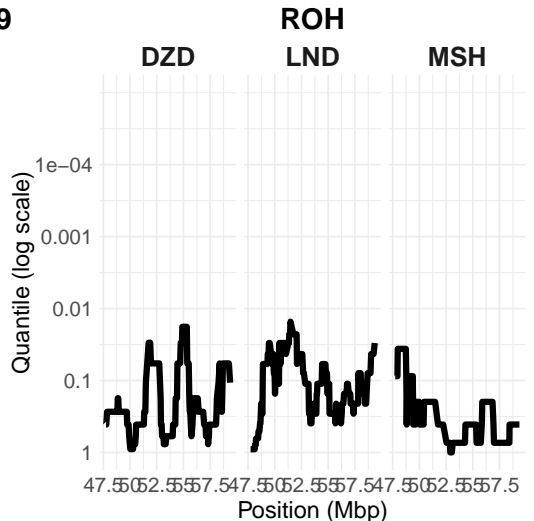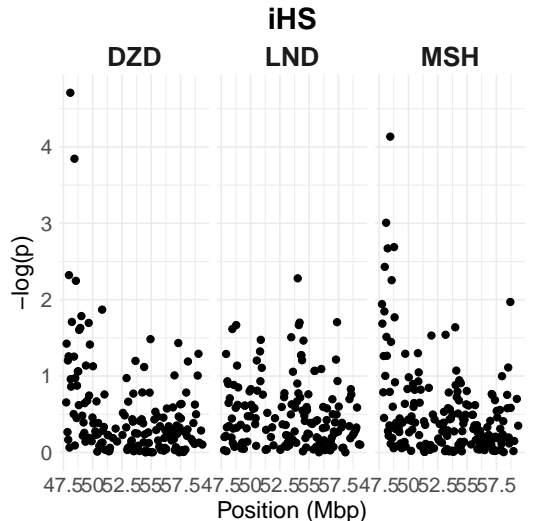

**SouthAfrica 19:7826339–9843633**

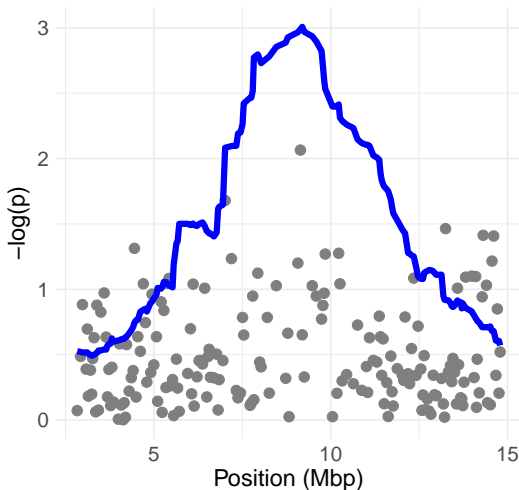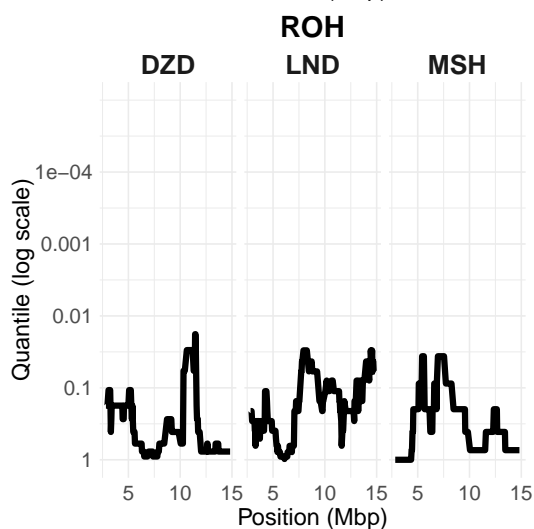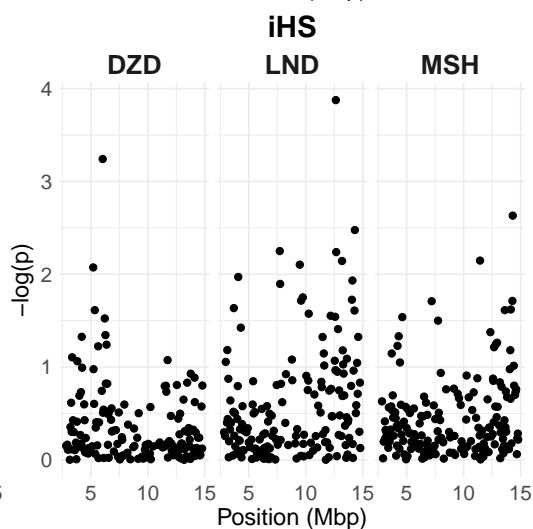

**SouthAfrica 20:39575171–45511327**

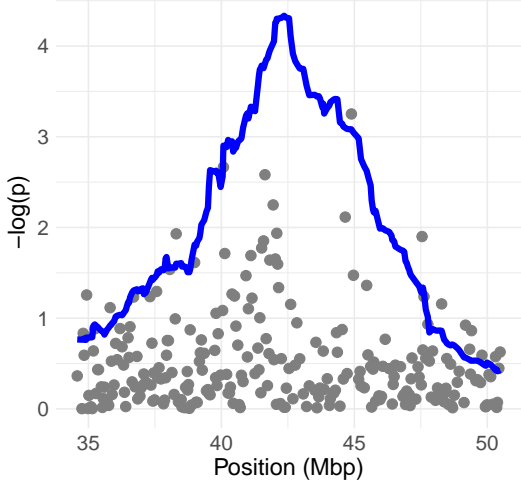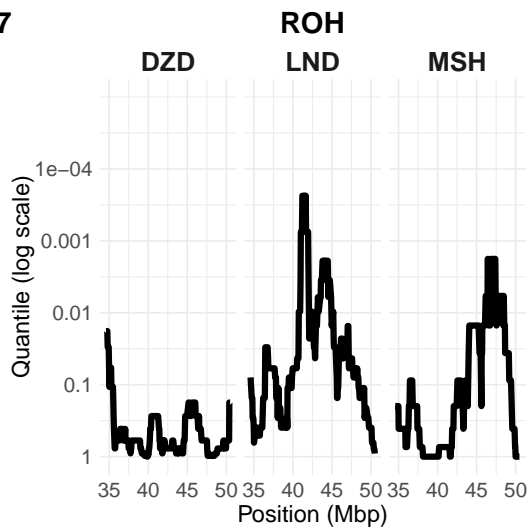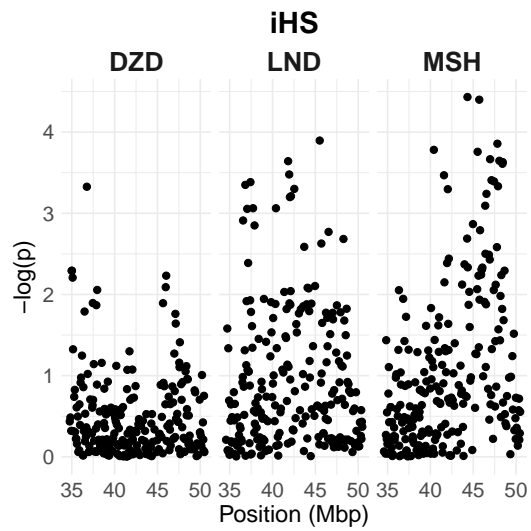

**SouthAfrica 20:62097412–71781295**

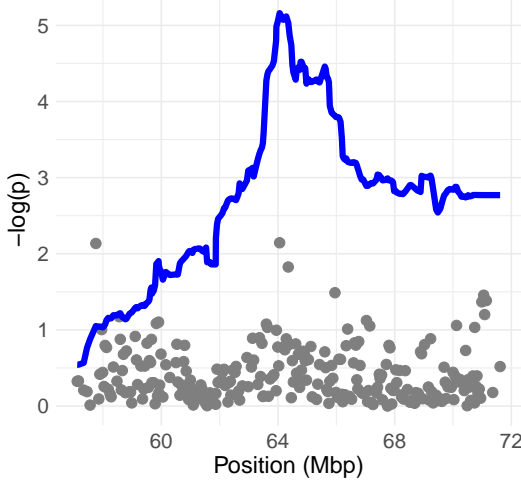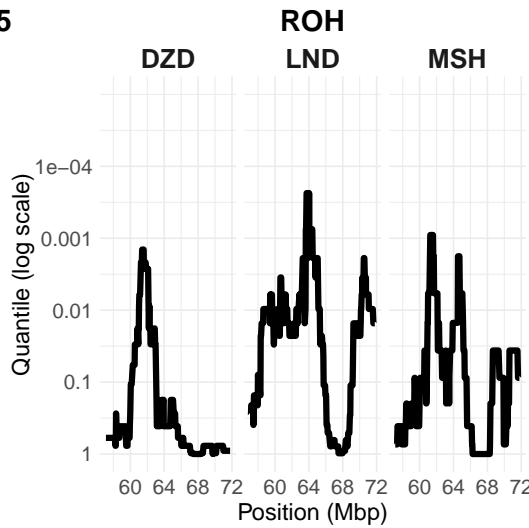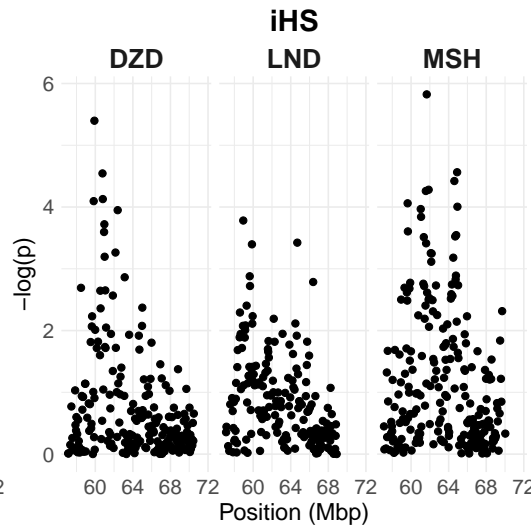

**SouthAfrica 24:56647513–62183185**

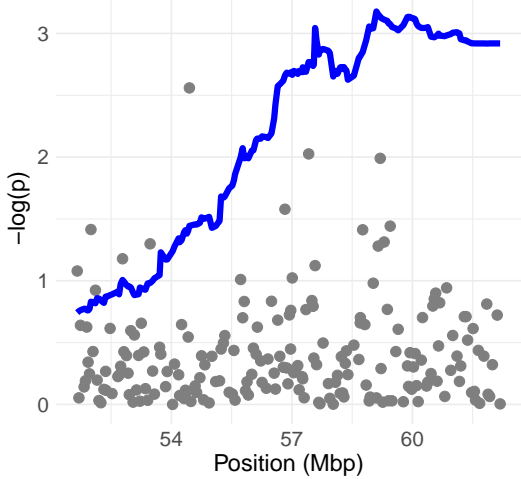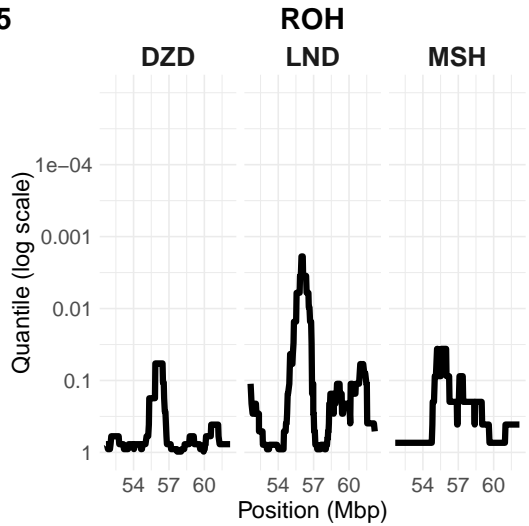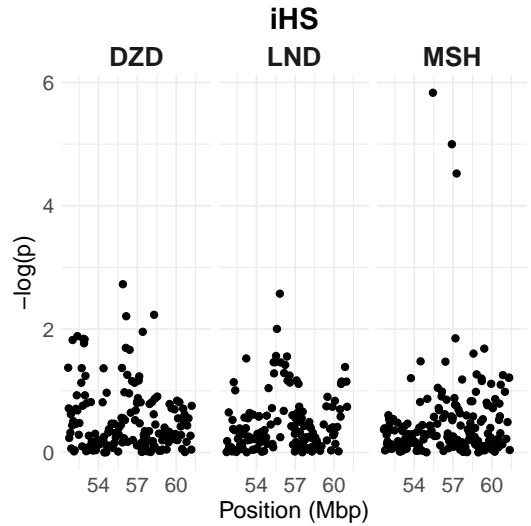

**SouthAfrica 27:41378342–43498682**

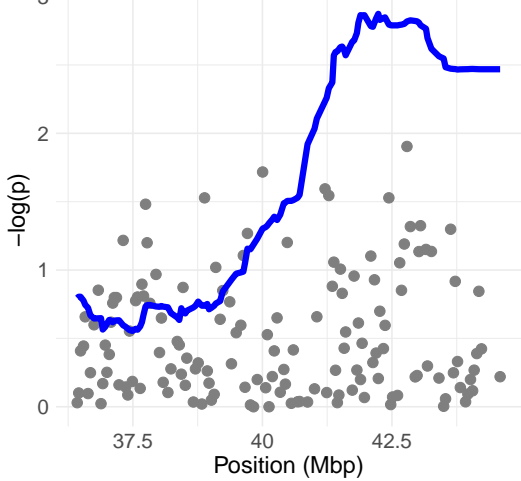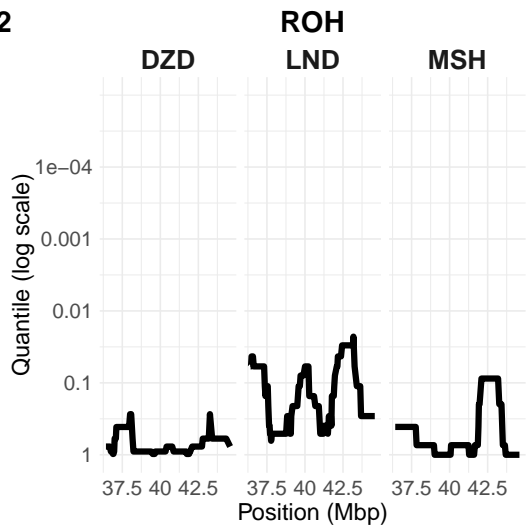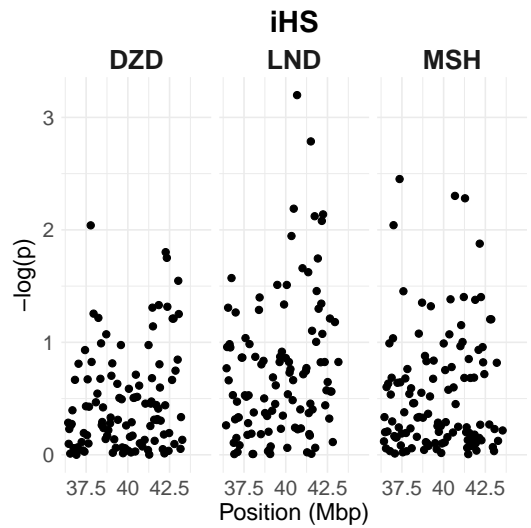

### SouthEastEurope 1:104689233–105366890

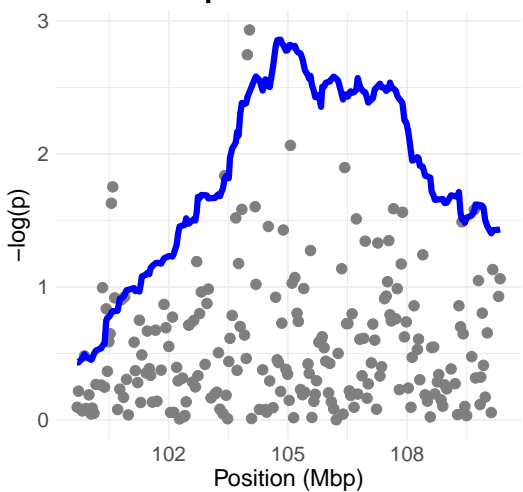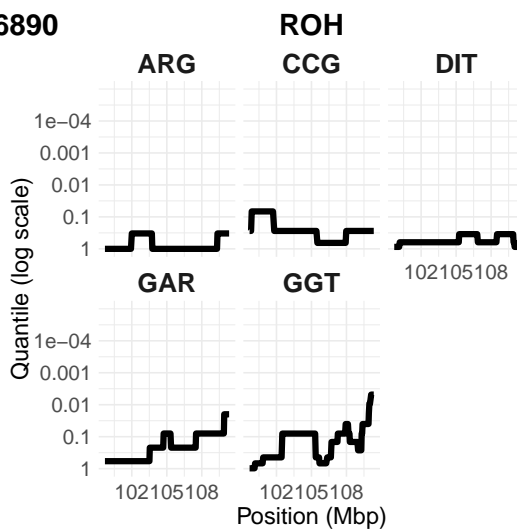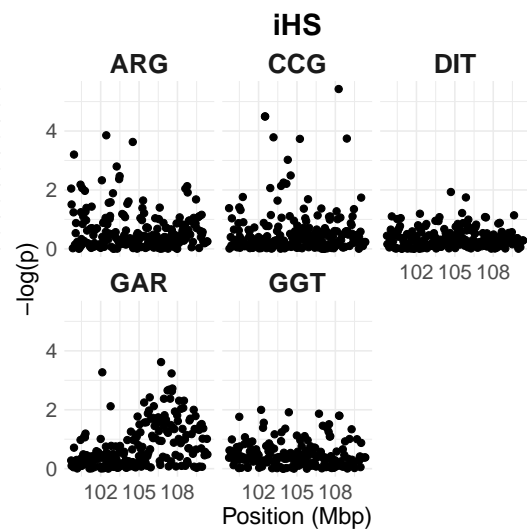

### SouthEastEurope 4:19451901–22034923

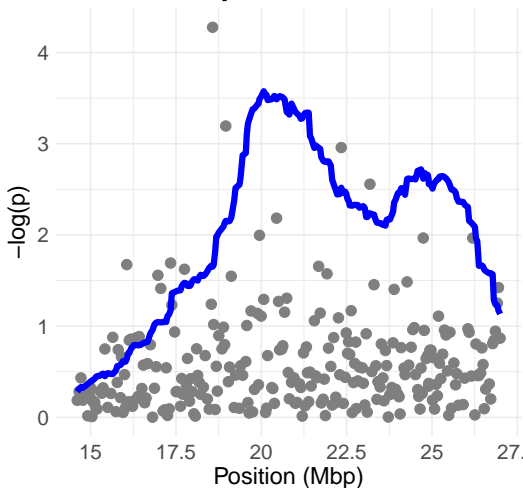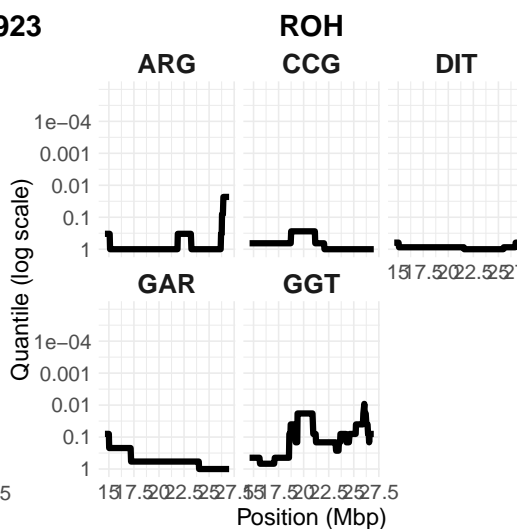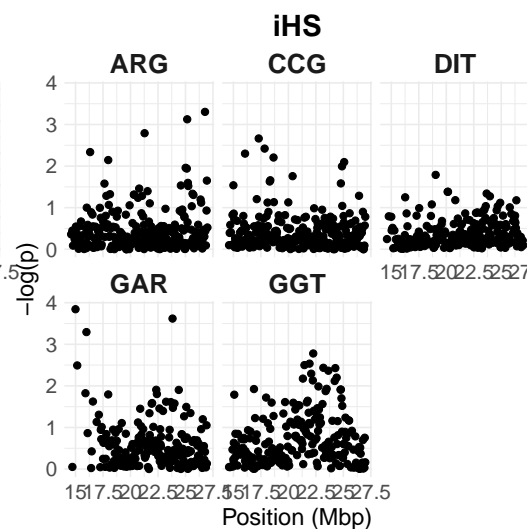

### SouthEastEurope 4:24581276–24677932

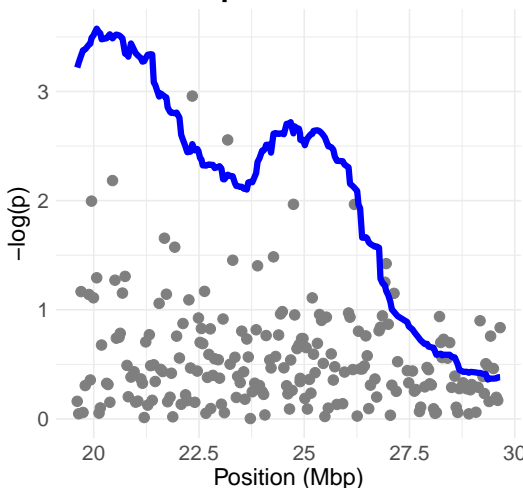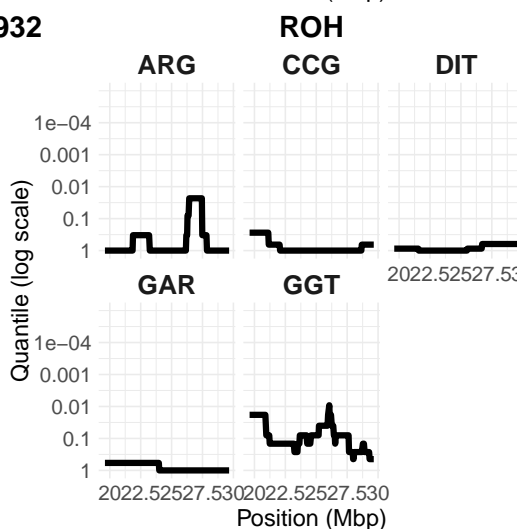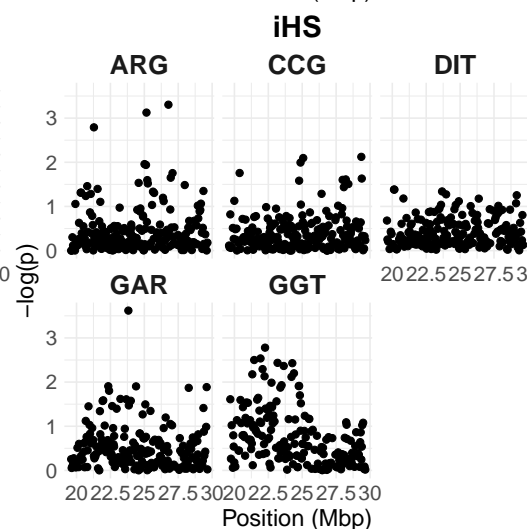

### SouthEastEurope 5:33693610–36375339

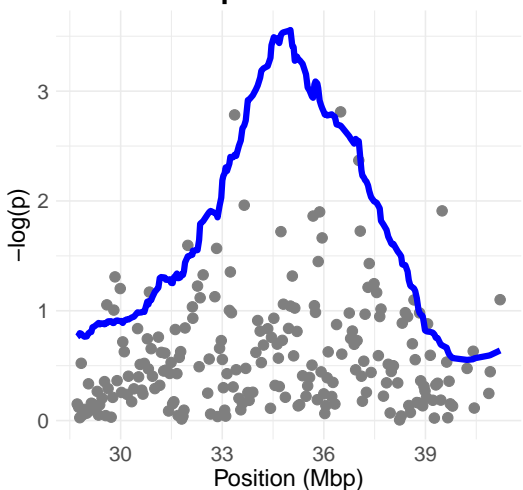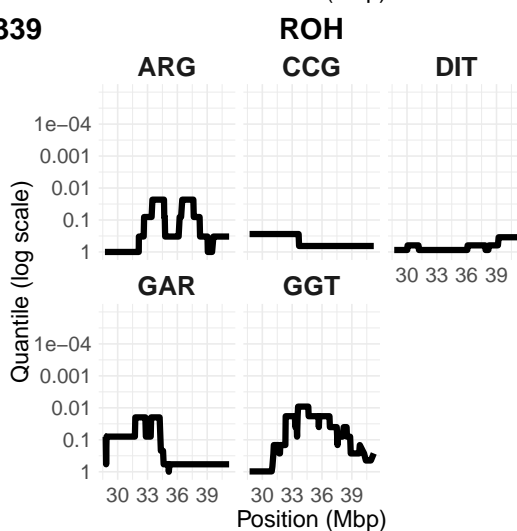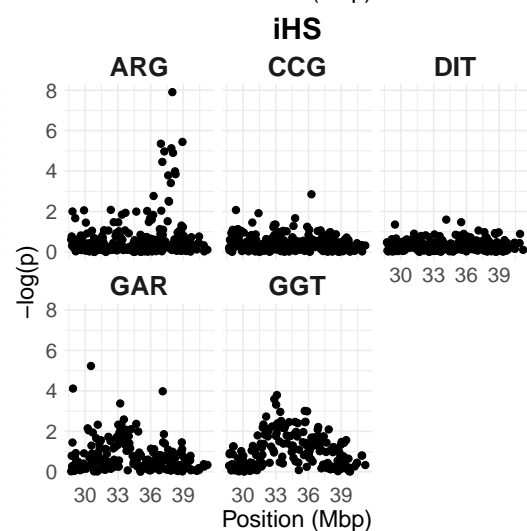

**SouthEastEurope 6:25577939–42622601**

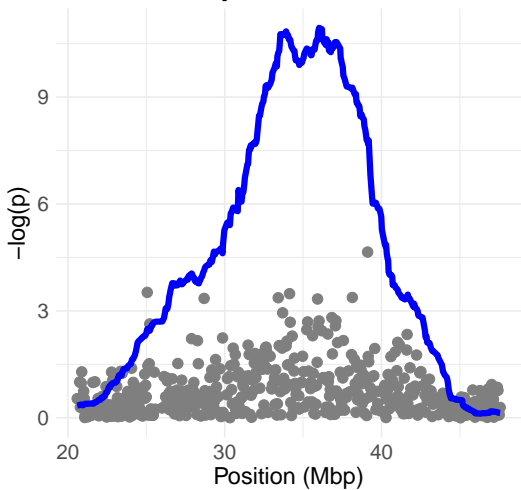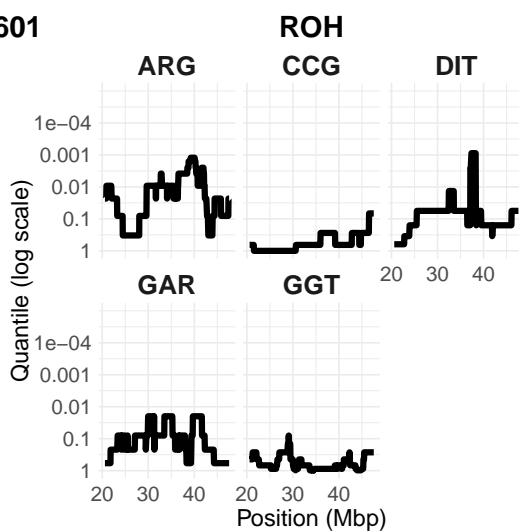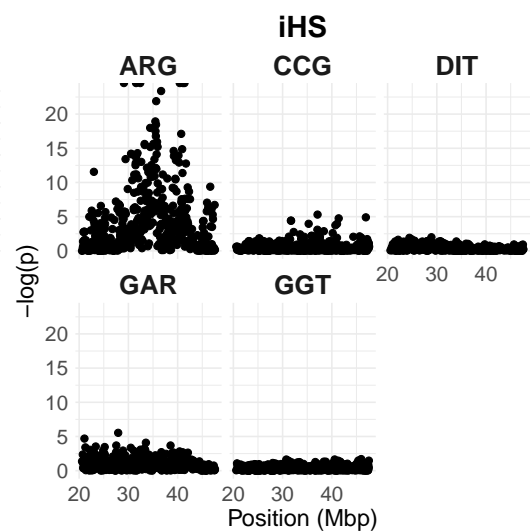

**SouthEastEurope 6:69276841–71495823**

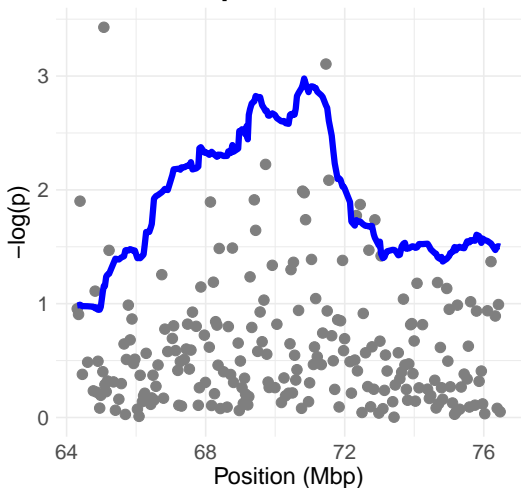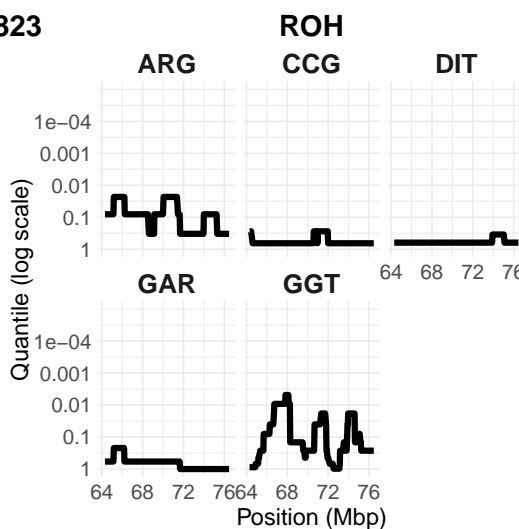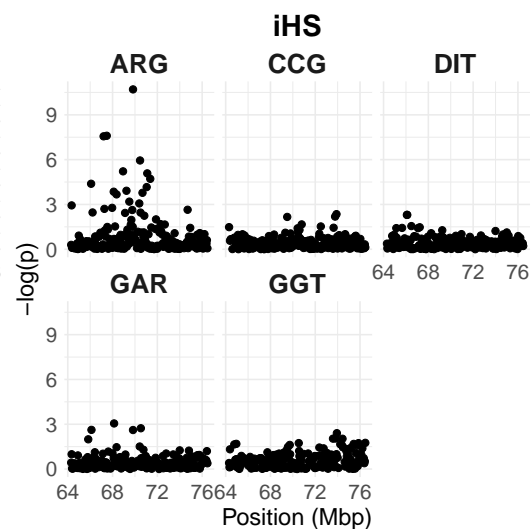

**SouthWestEurope 1:115631053–121977086**

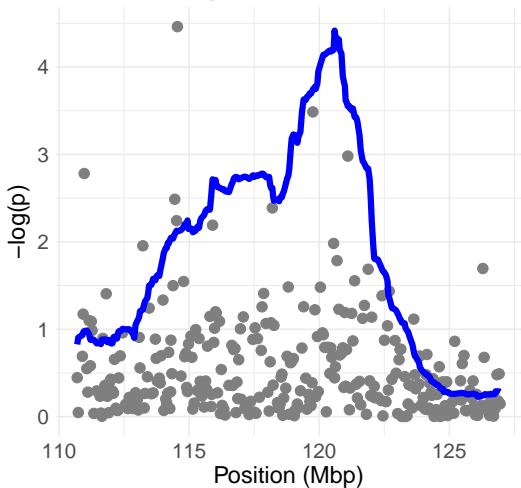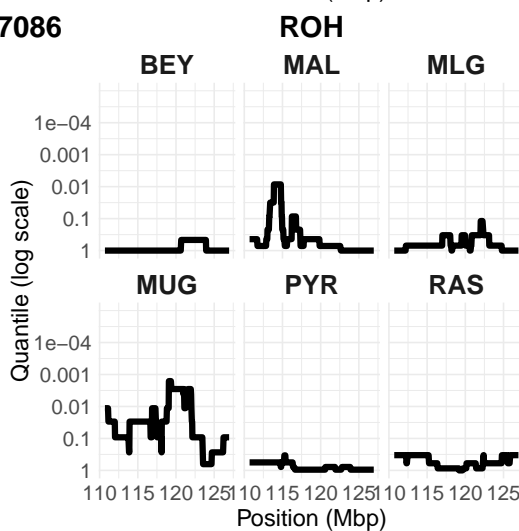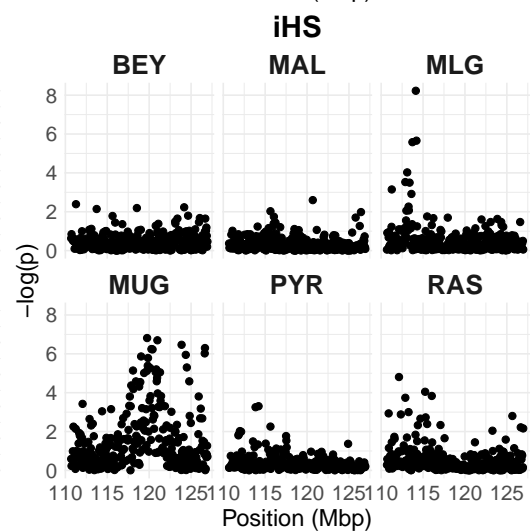

**SouthWestEurope 1:152997608–157299677**

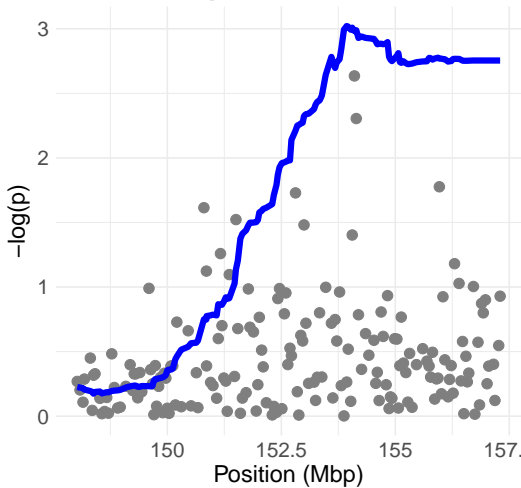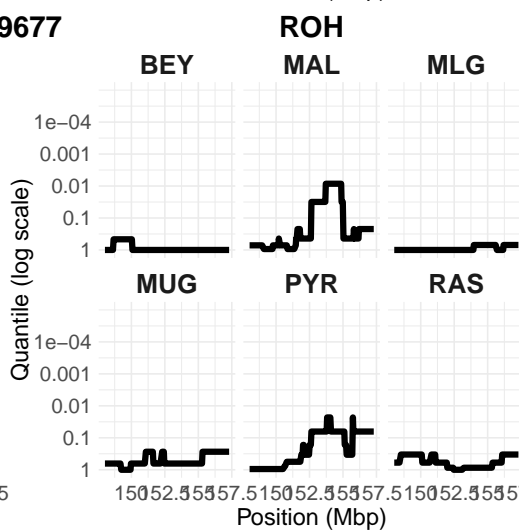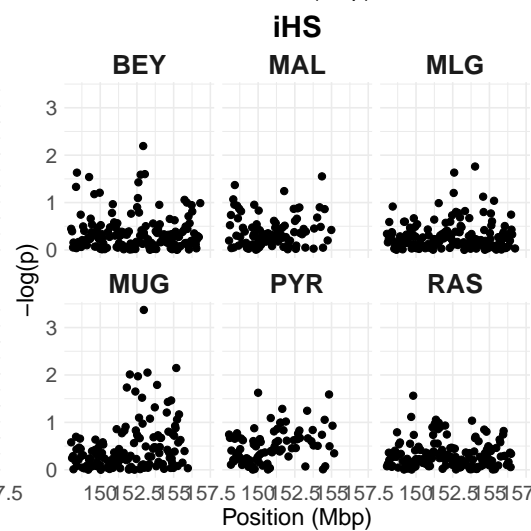

### SouthWestEurope 4:42274548–49845833

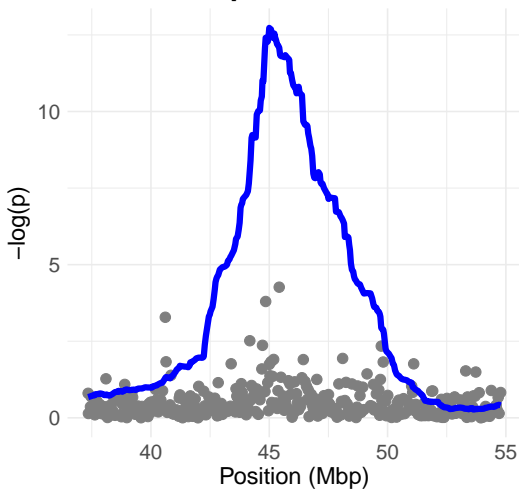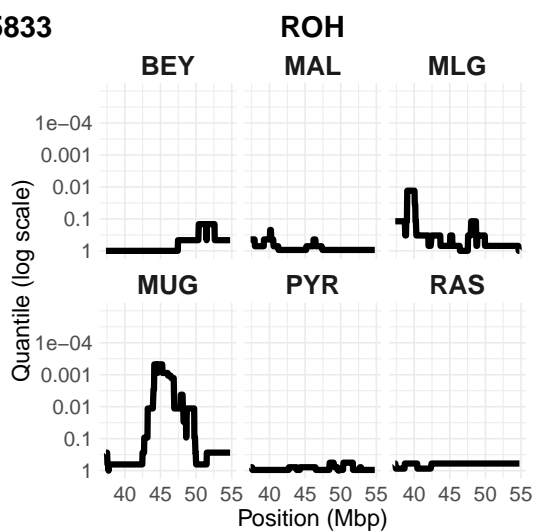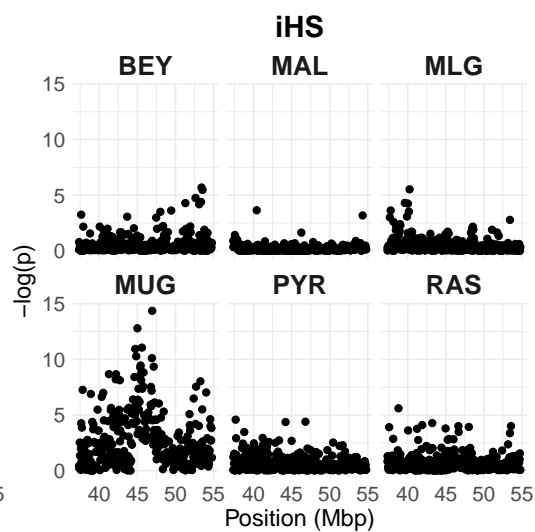

### SouthWestEurope 5:26482234–38473200

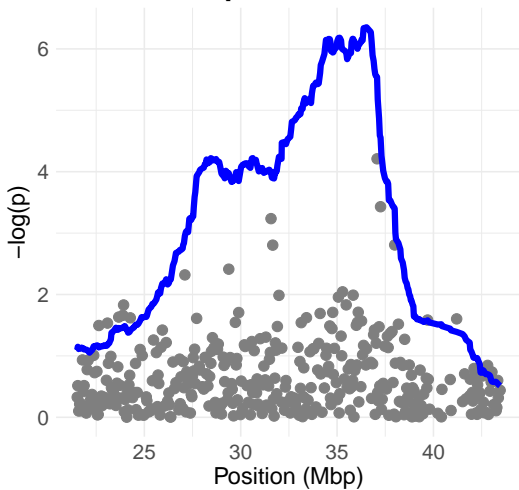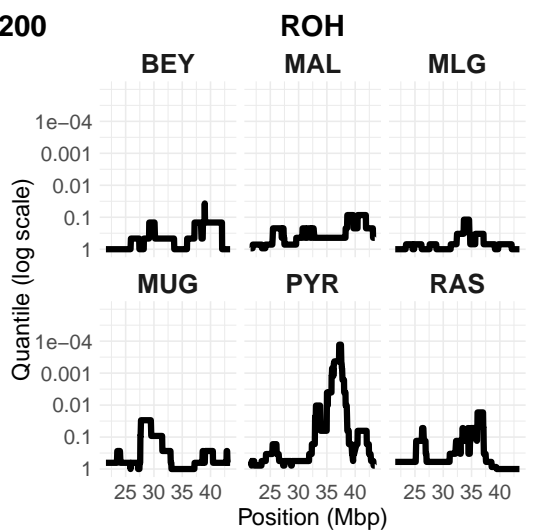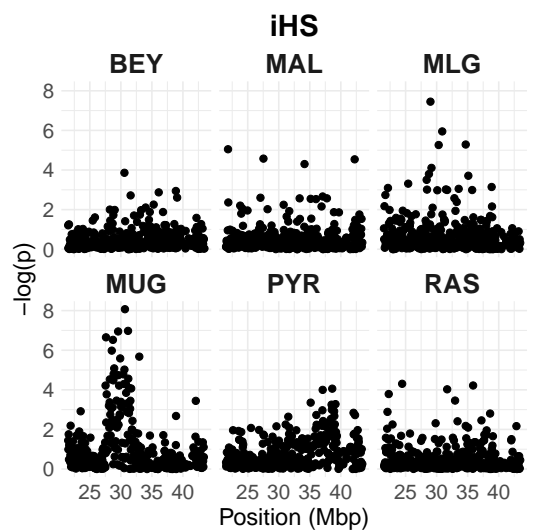

### SouthWestEurope 5:108677642–110677642

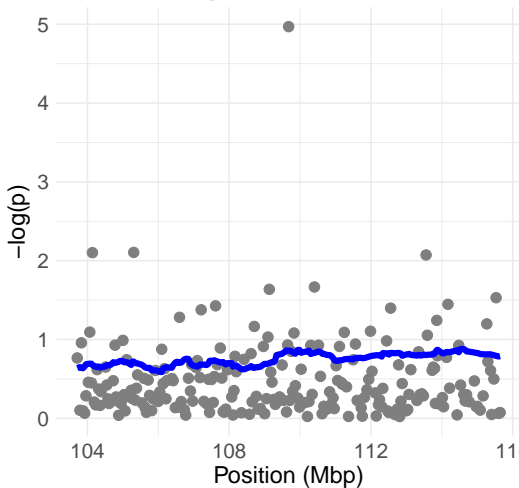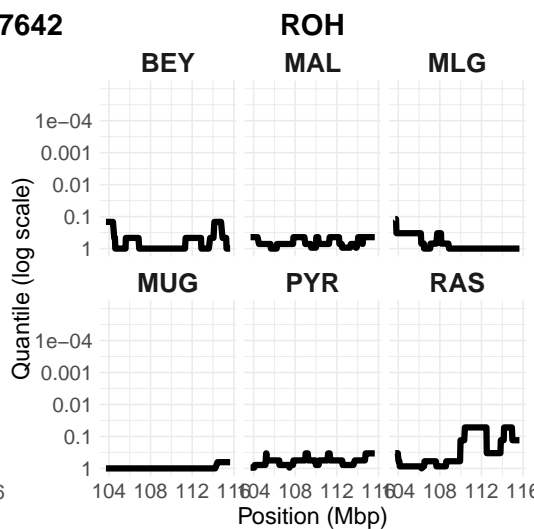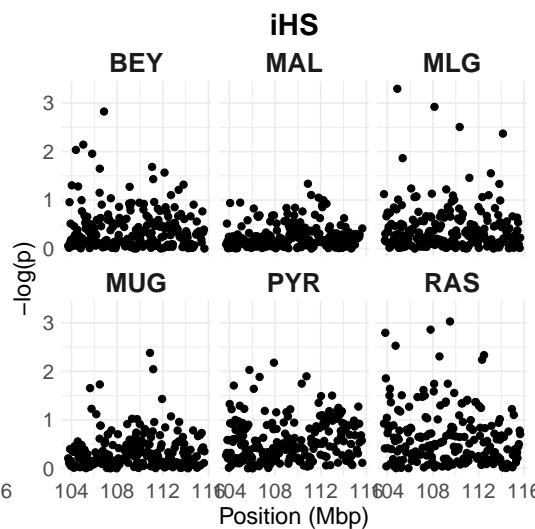

### SouthWestEurope 6:28226788–40254762

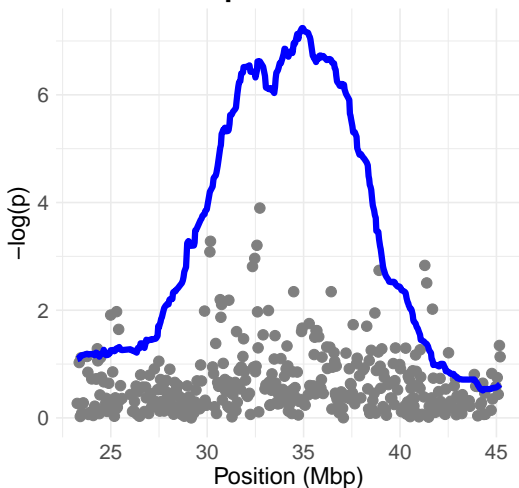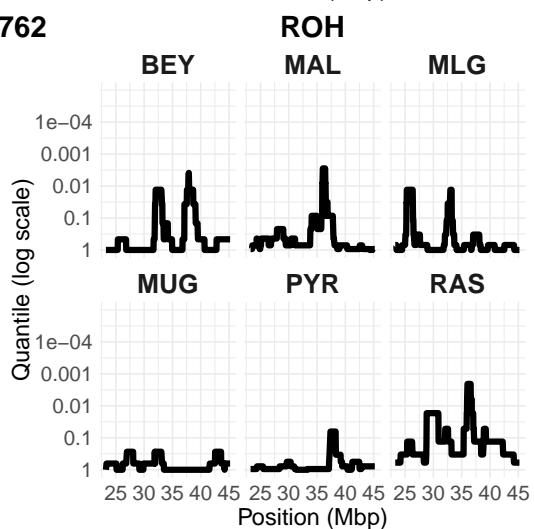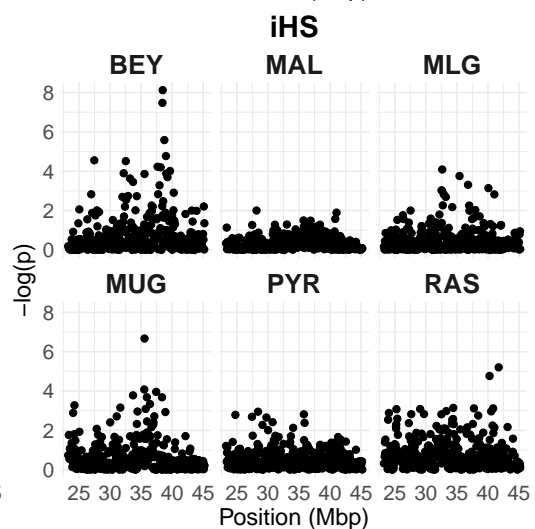

### SouthWestEurope 12:56346759–60001028

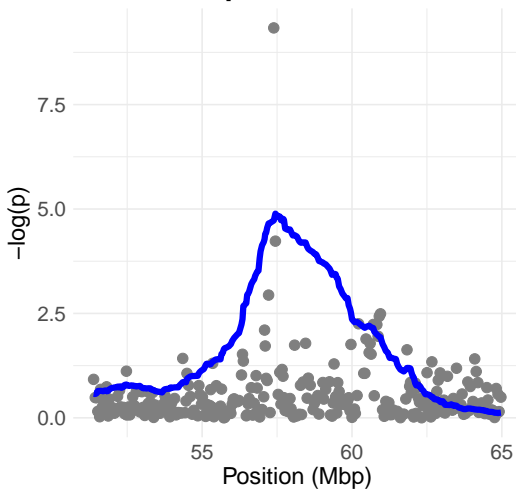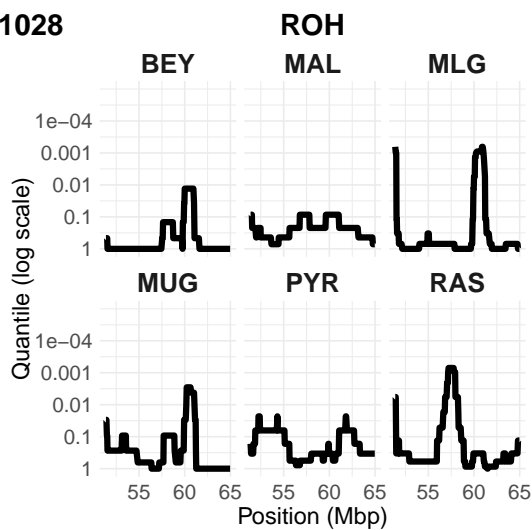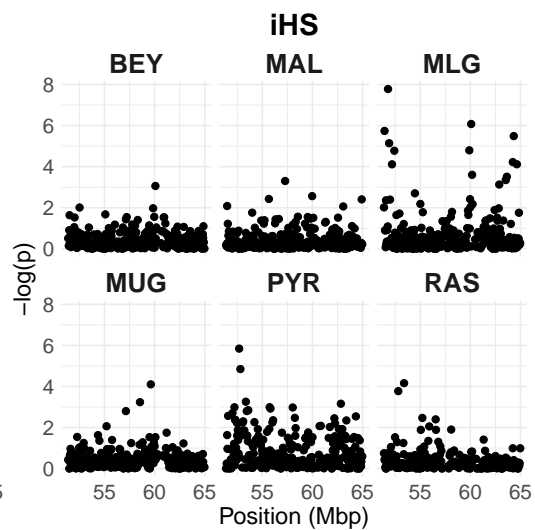

### SouthWestEurope 16:36920184–37286479

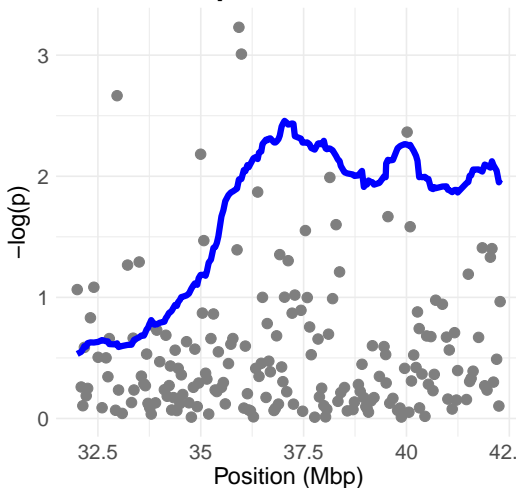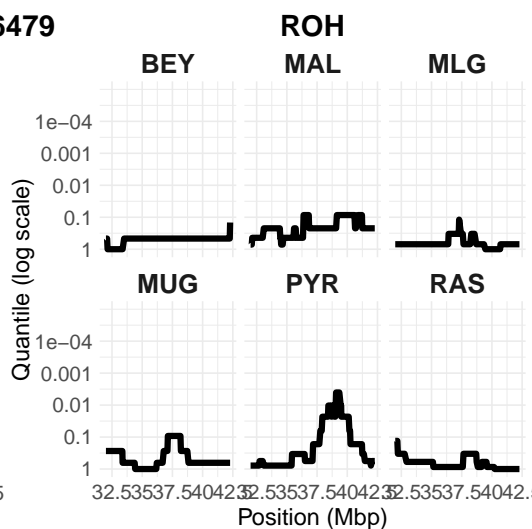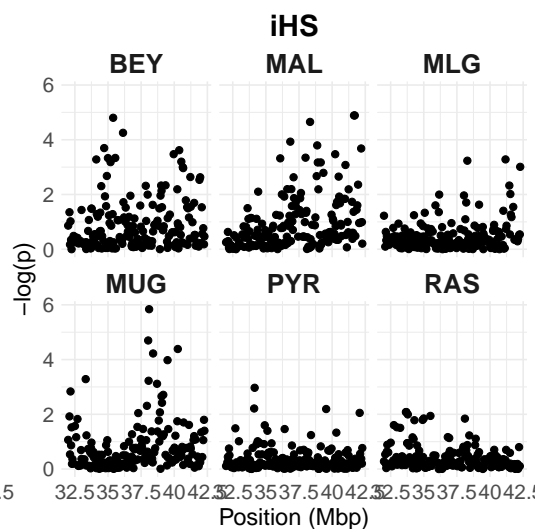

### SouthWestEurope 16:44337810–52775081

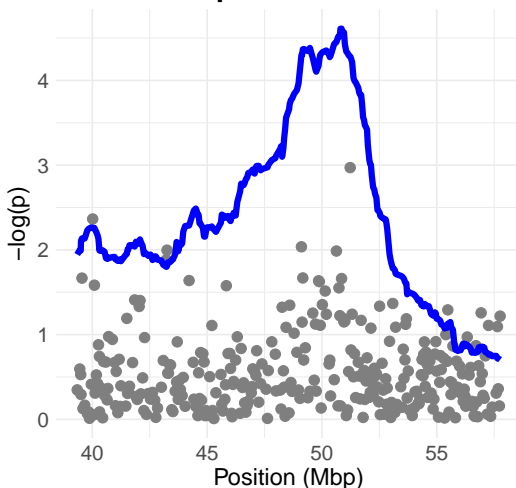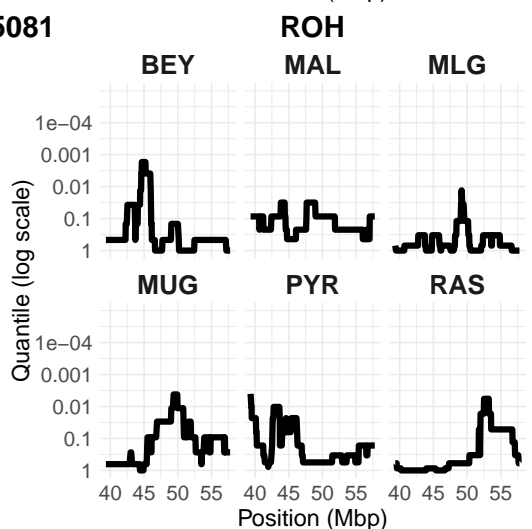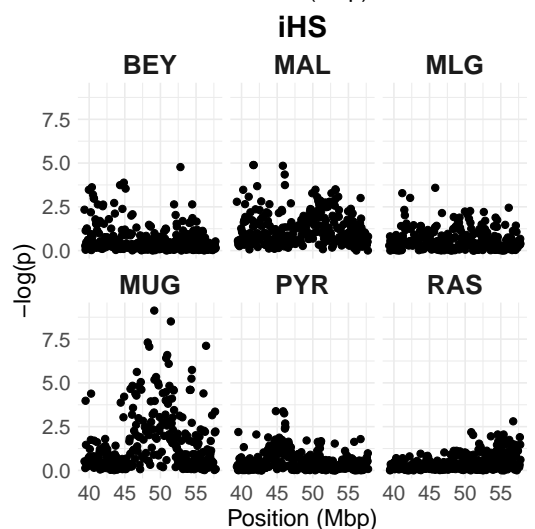

### SouthWestEurope 17:47363443–51843758

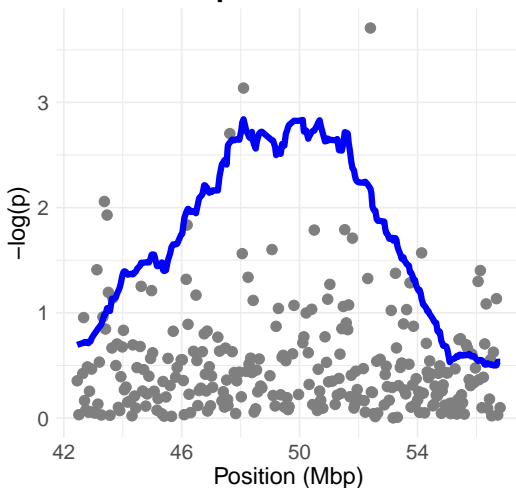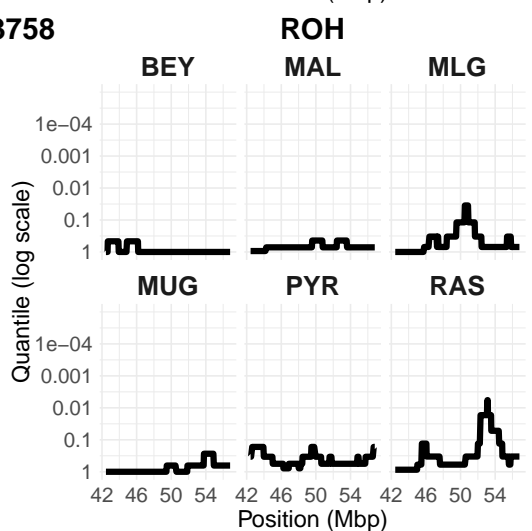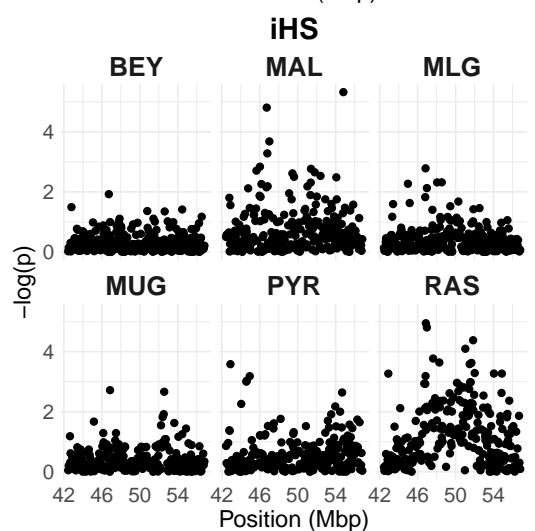



### SouthWestEurope 20:39090403-48445048

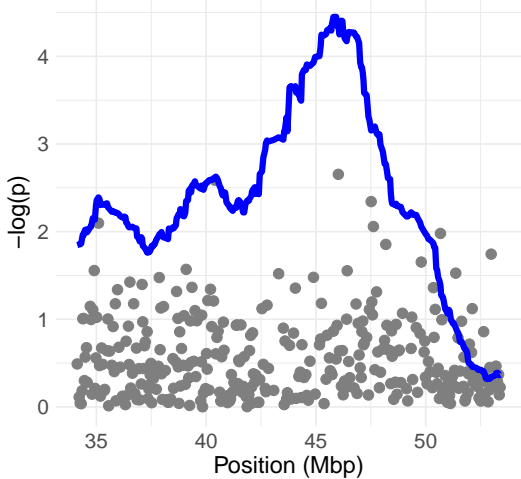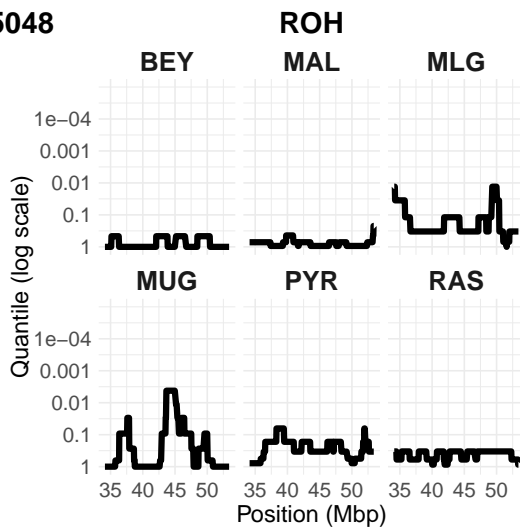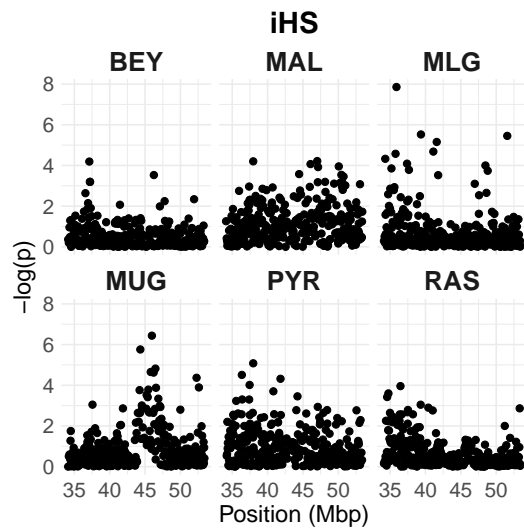

### SouthWestEurope 25:4395270-6395270

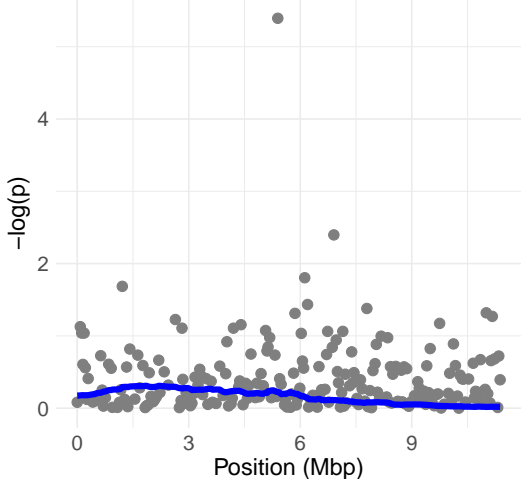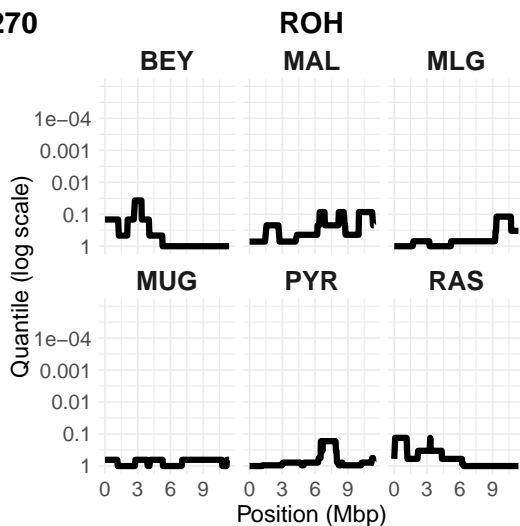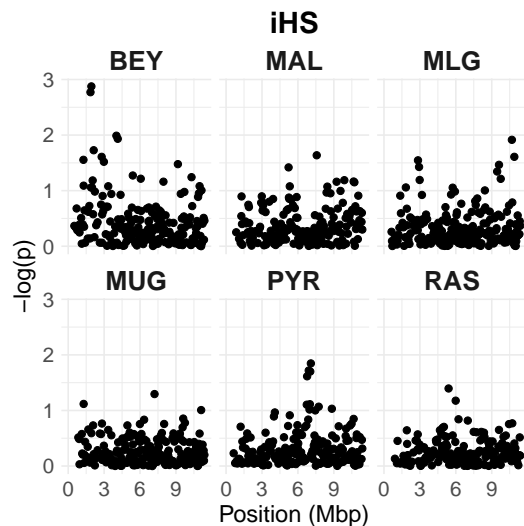

### SouthWestEurope 29:41725738-42566976

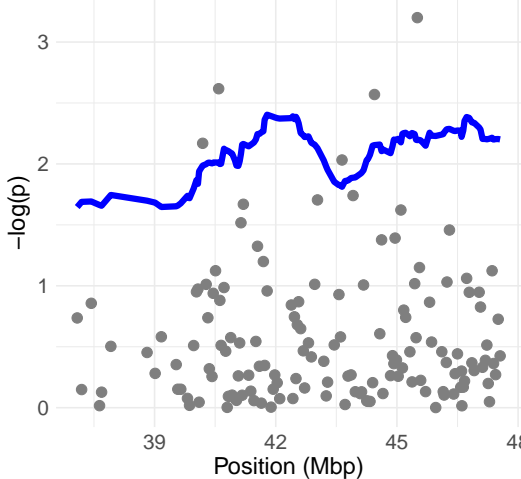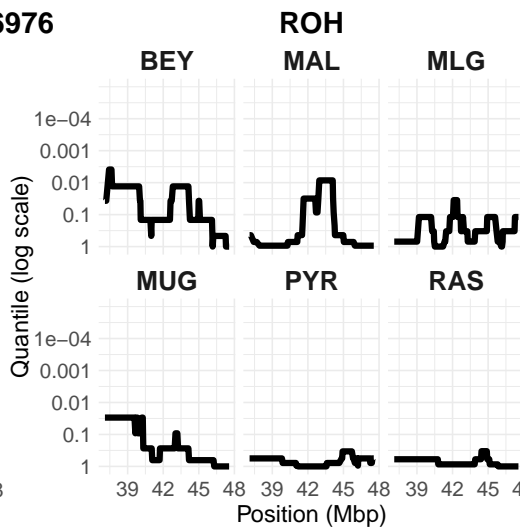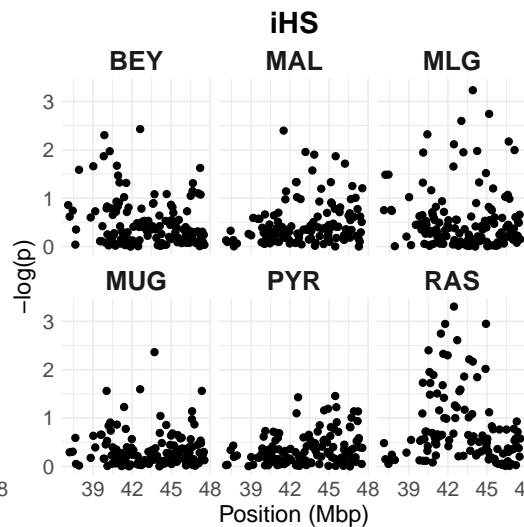

Supplement: MOESM4 [file 12711_2018_421_MOESM4_ESM.pdf]
