# Supplementary material for: Signatures of selection and environmental adaptation across the goat genome post-domestication
Source: PubMed Central journal article supplement (PMC6240954; doi:10.1186/s12711-018-0421-y), 2018-11-19
Supplement: 12711_2018_421_MOESM1_ESM.pdf [file 12711_2018_421_MOESM1_ESM.pdf]

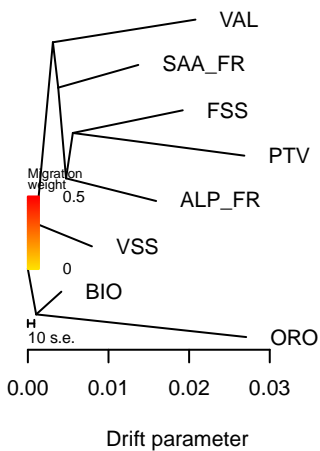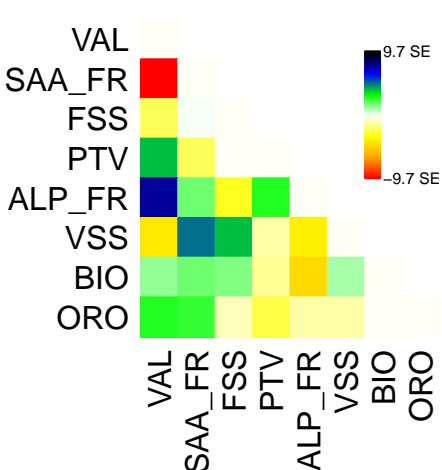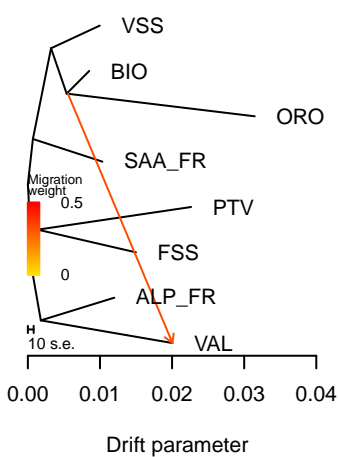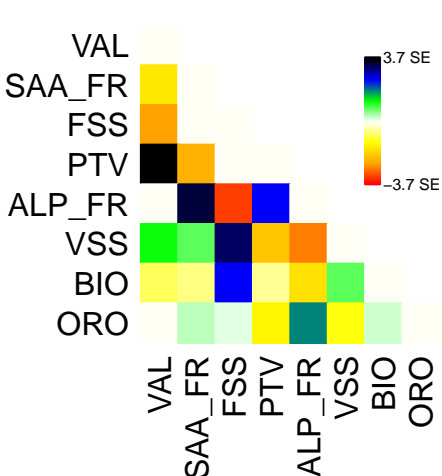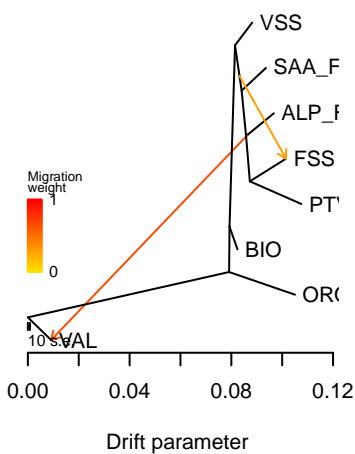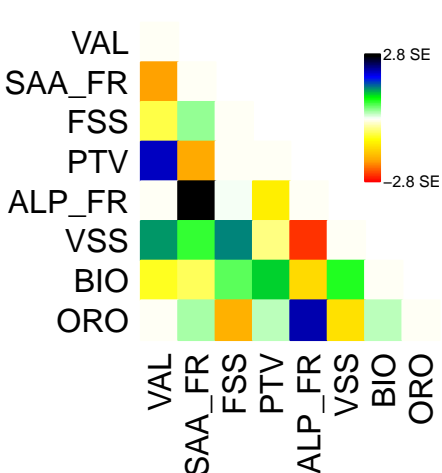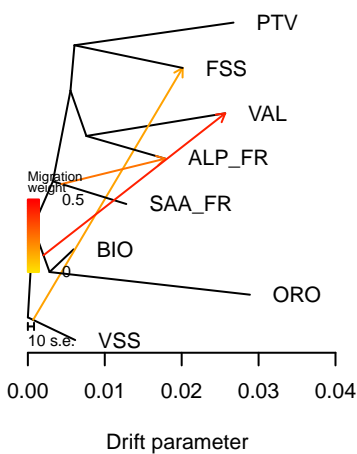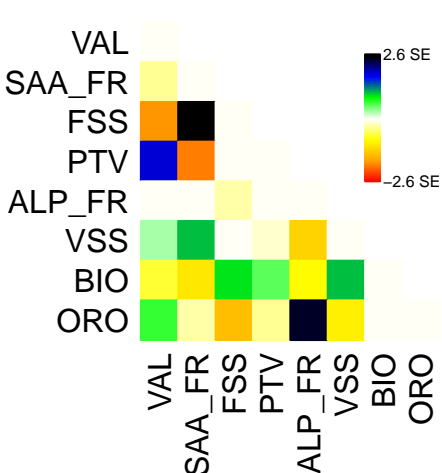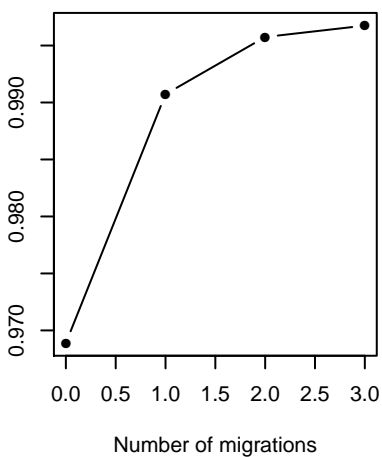

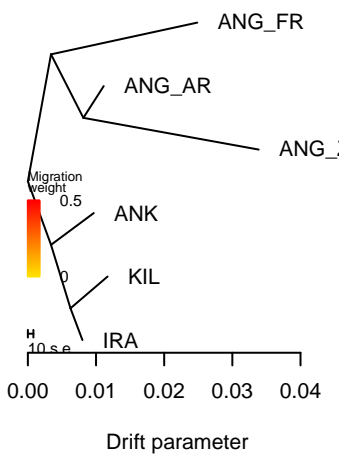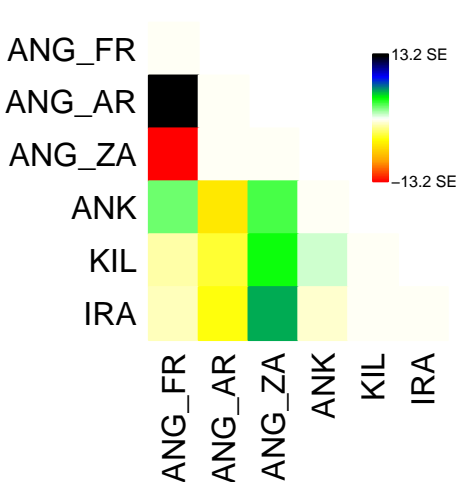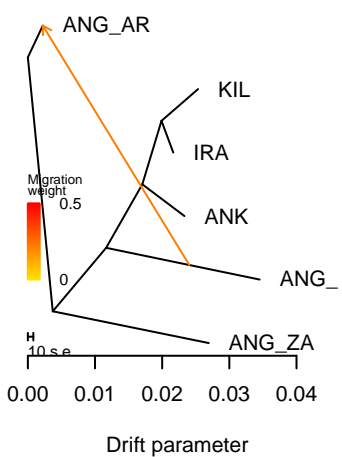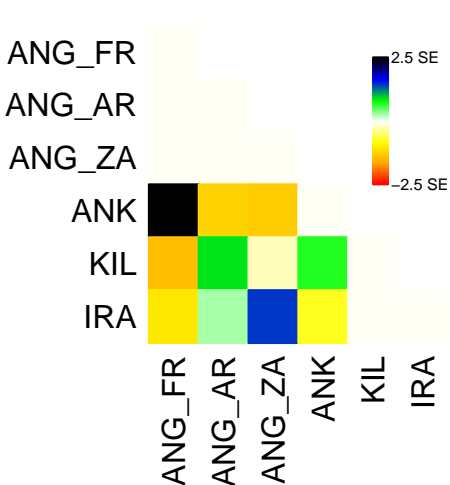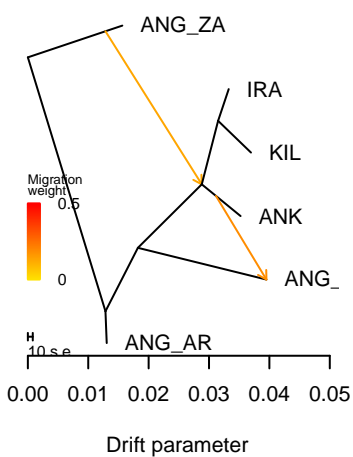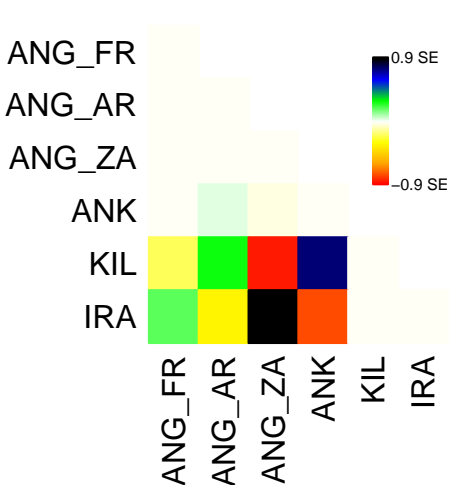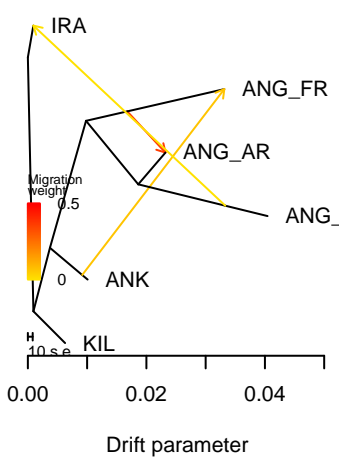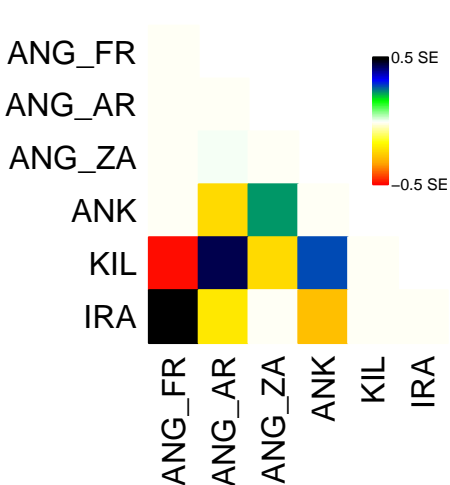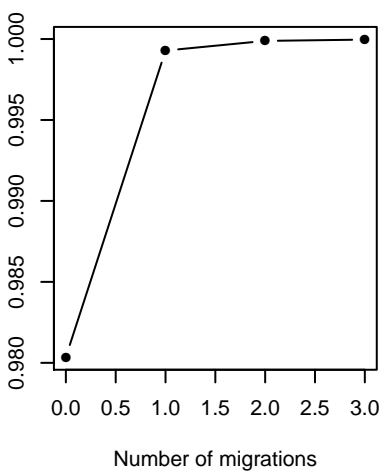

Angoras

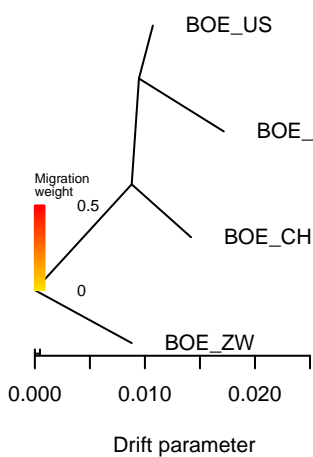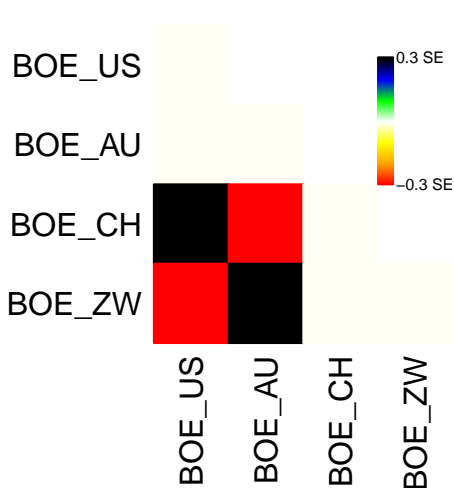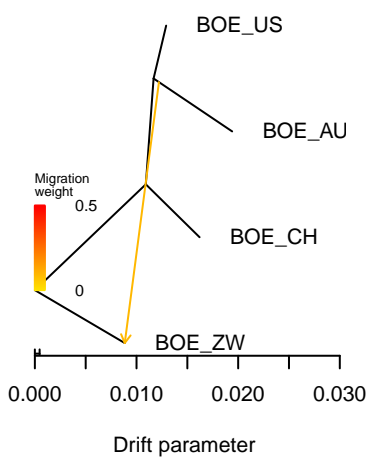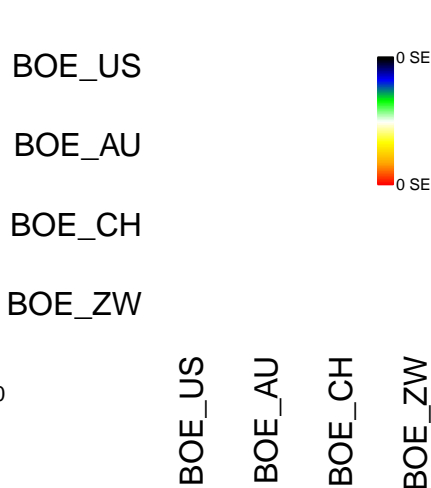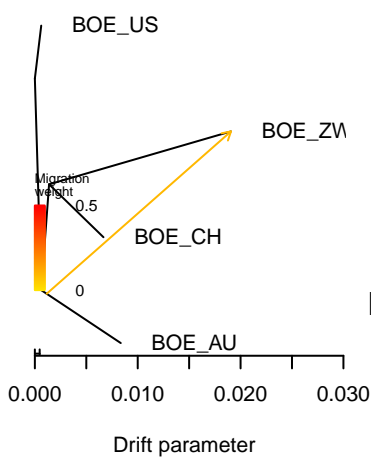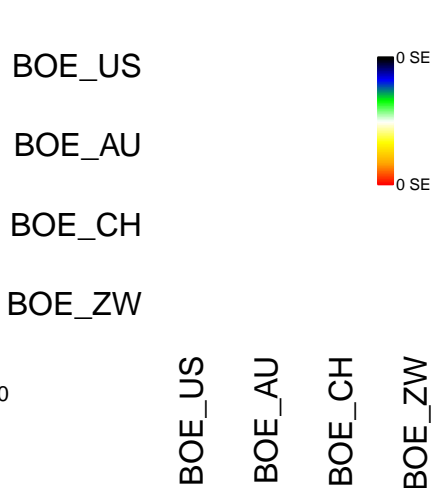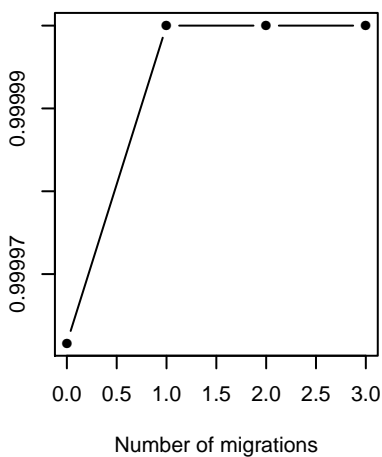

Boers

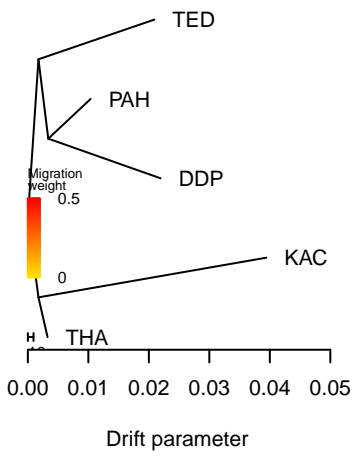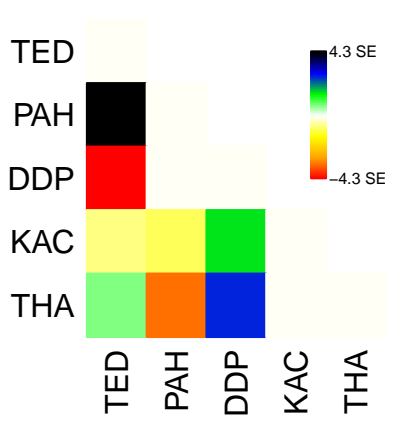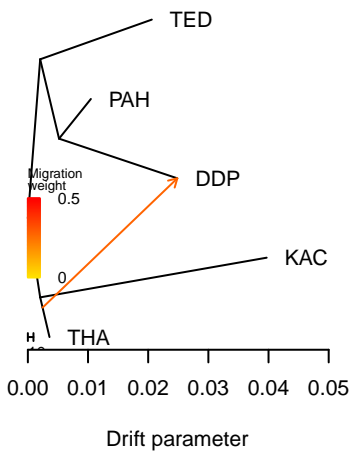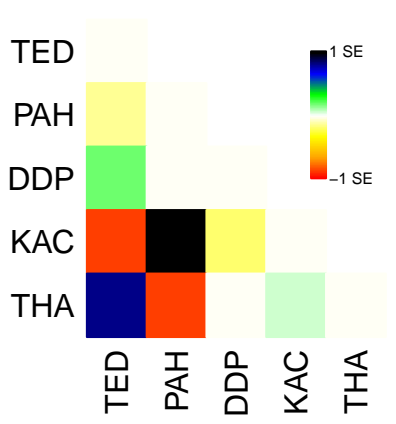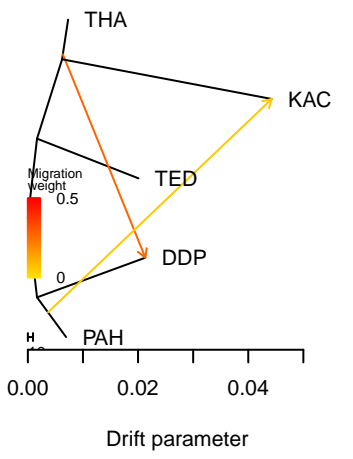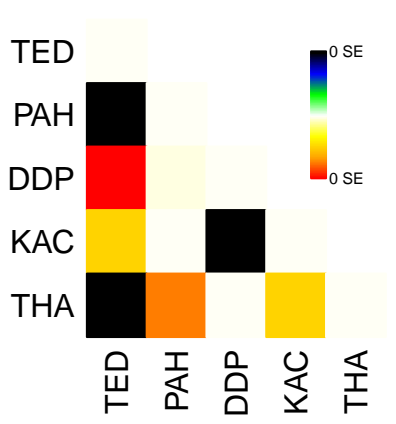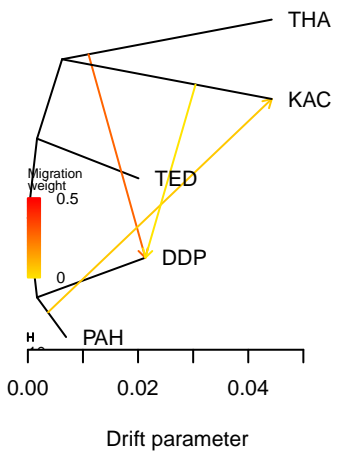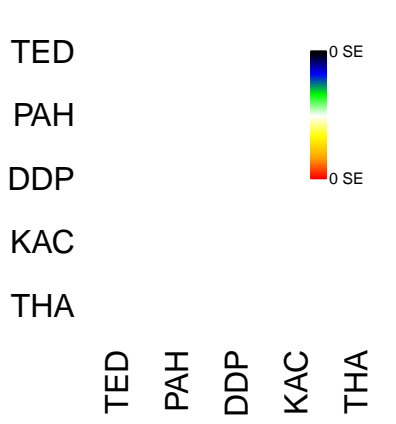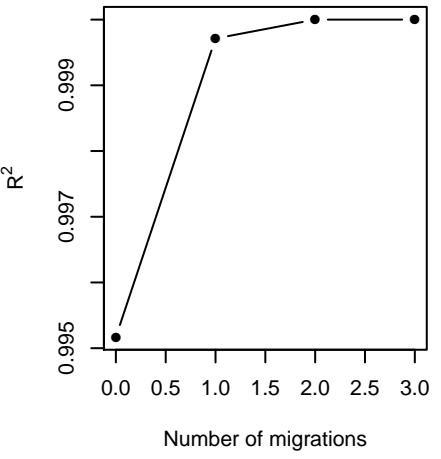

CentralAsia

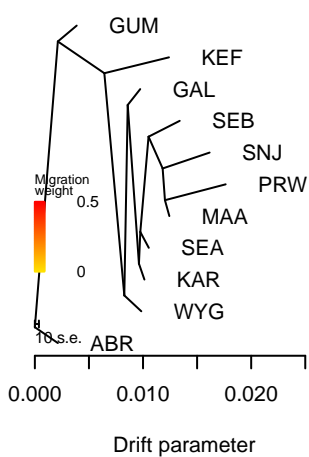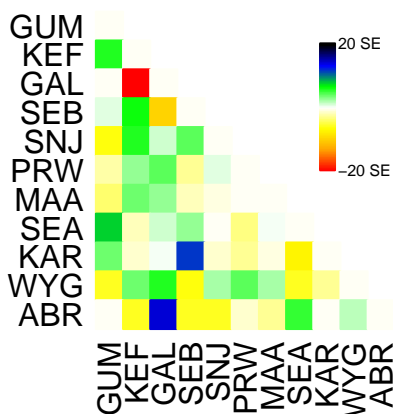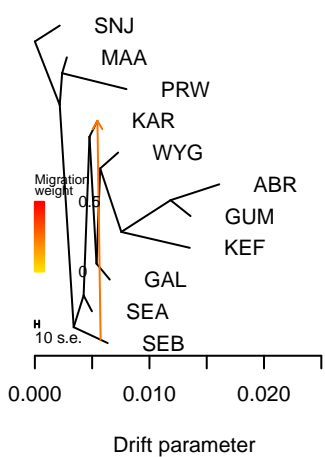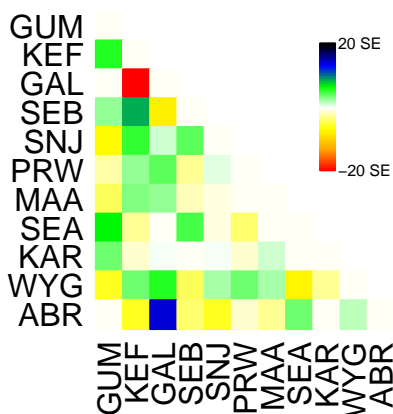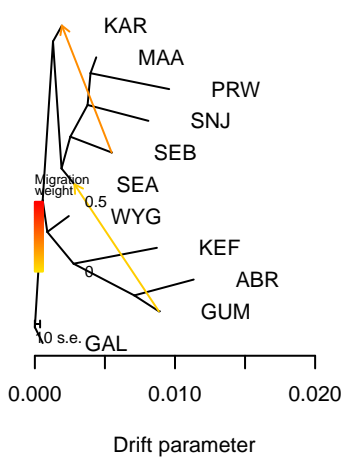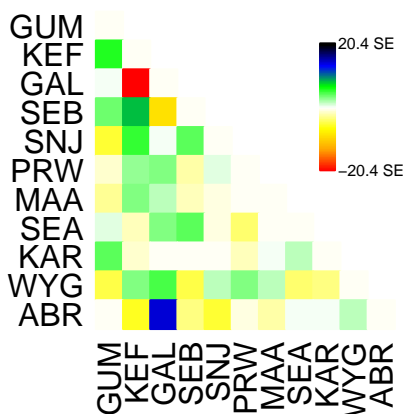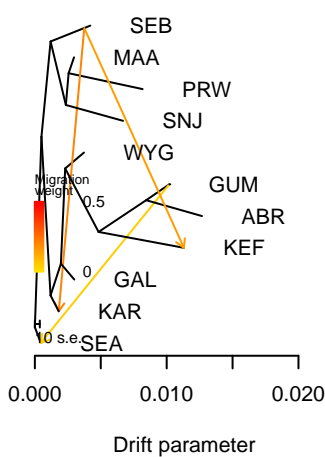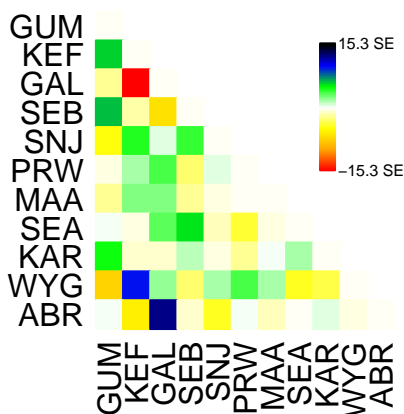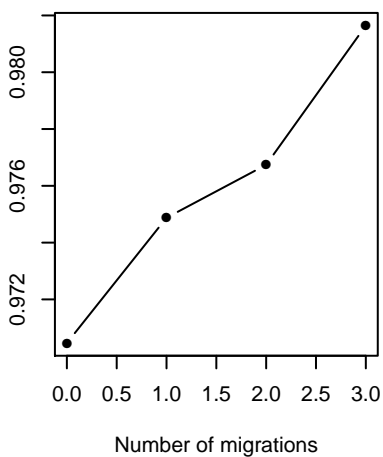

EastAfrica

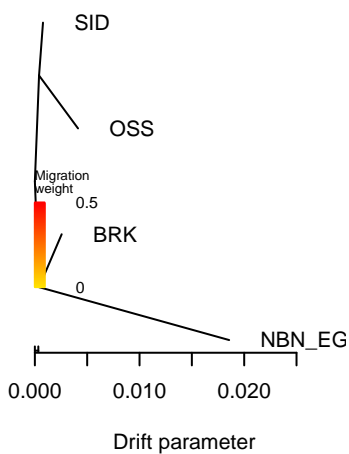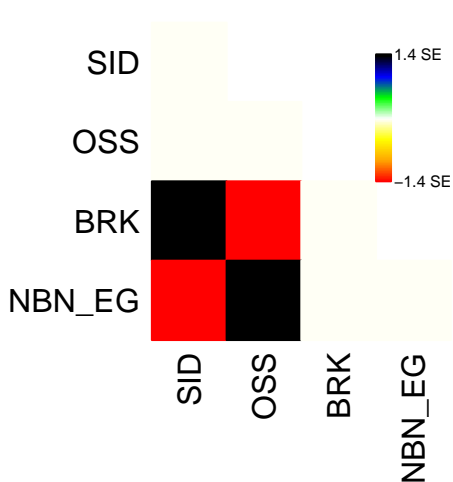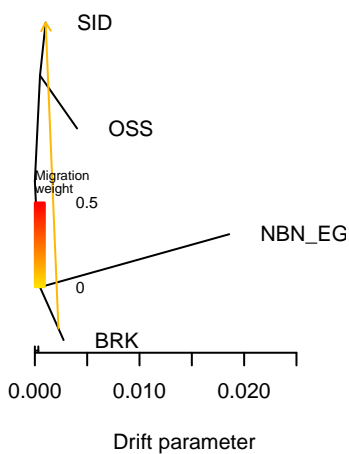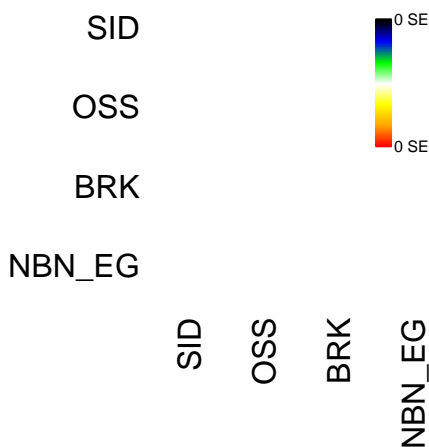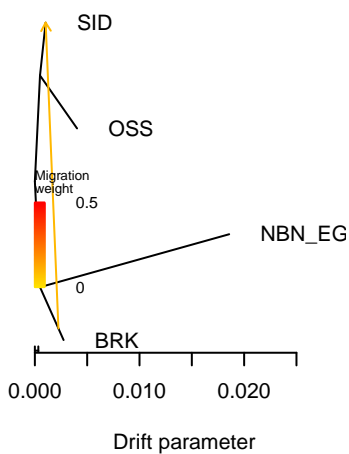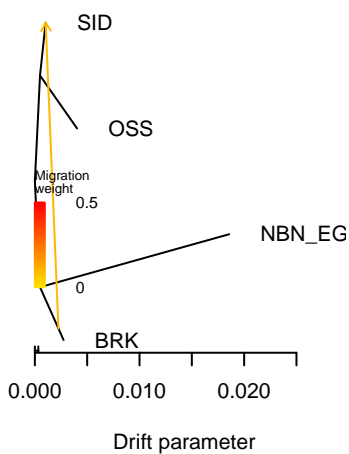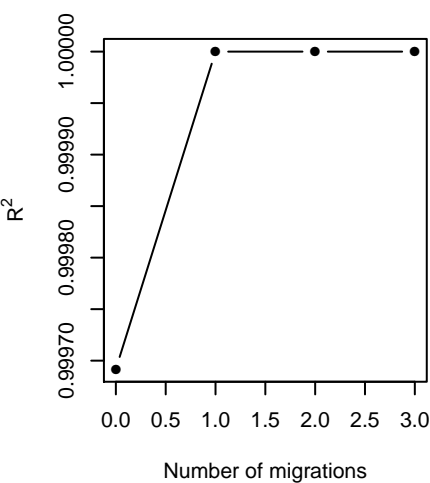

Egypt

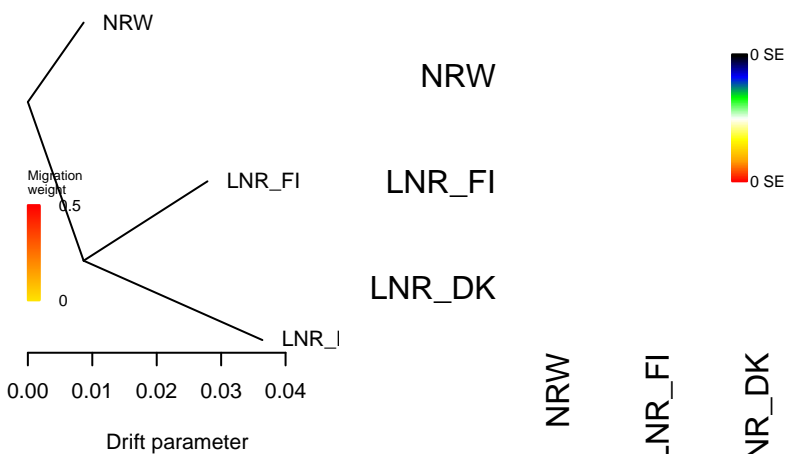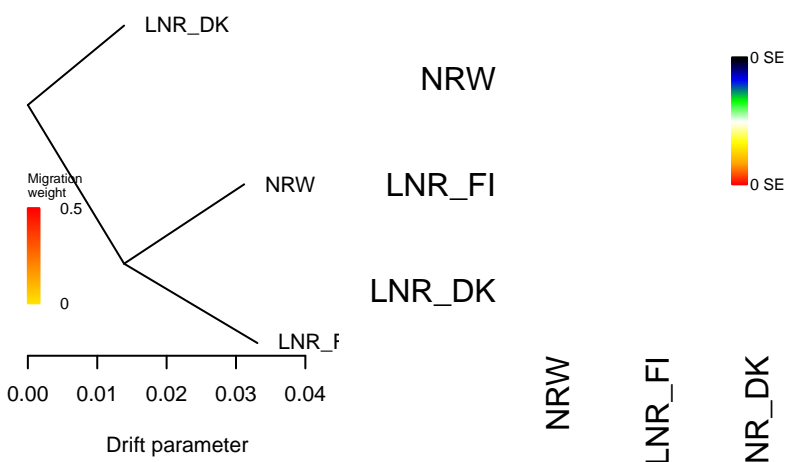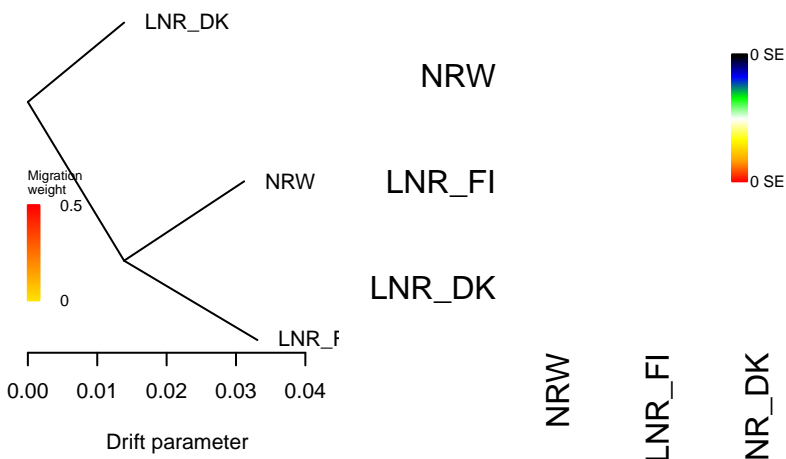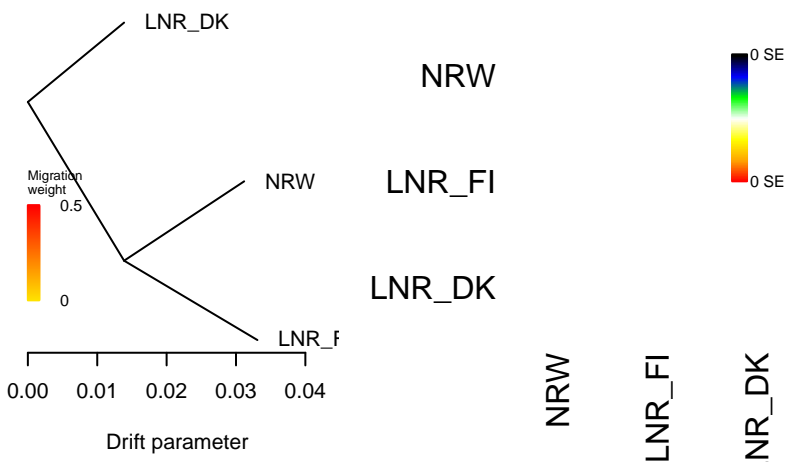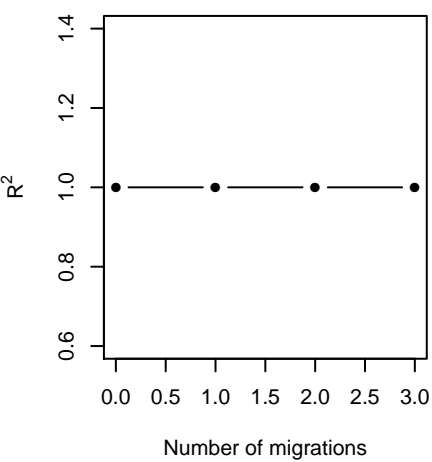

NorthEurope

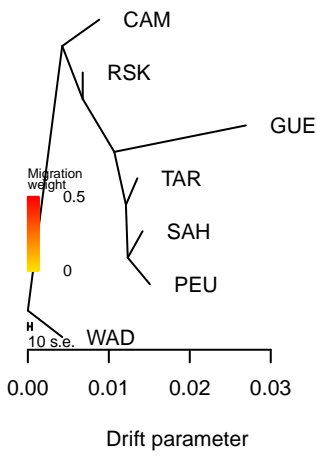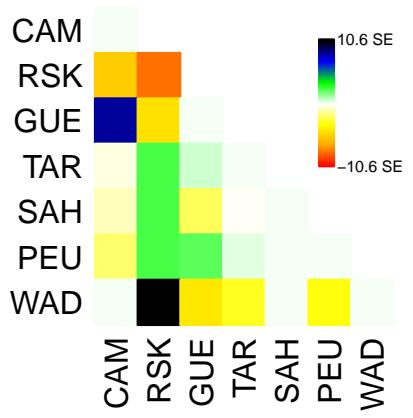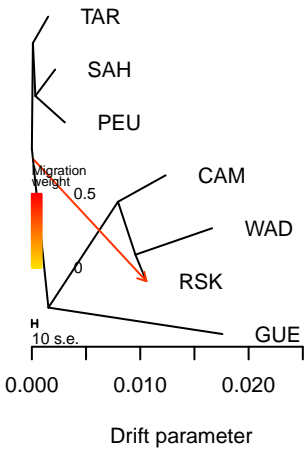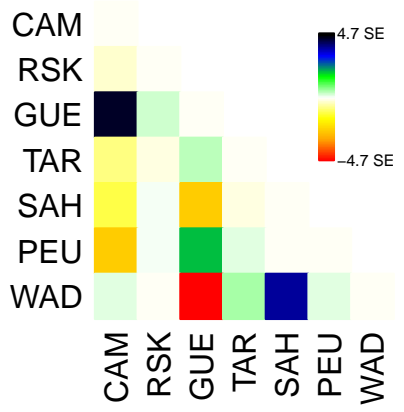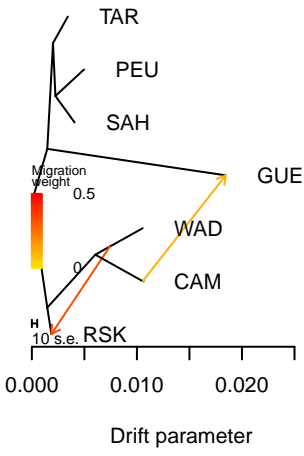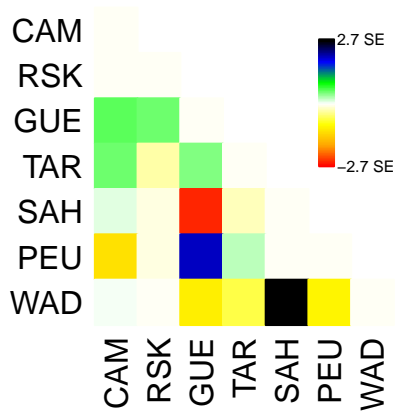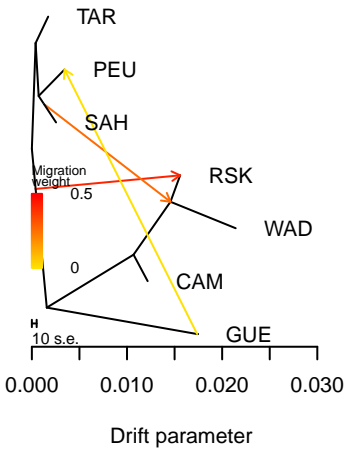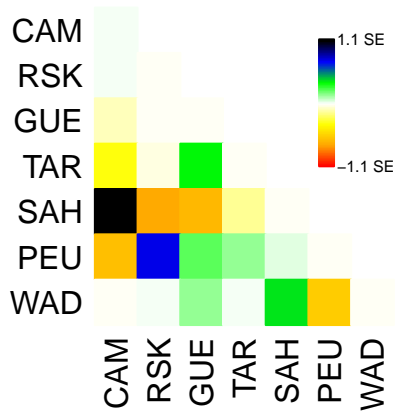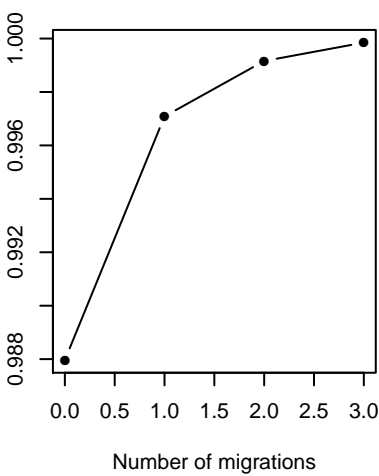

NorthWestAfrica



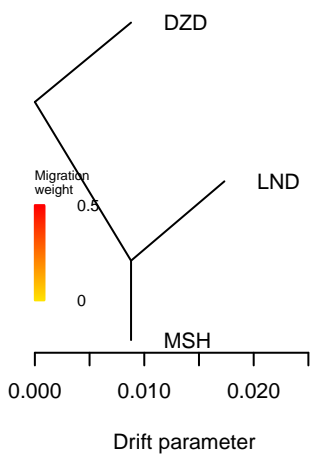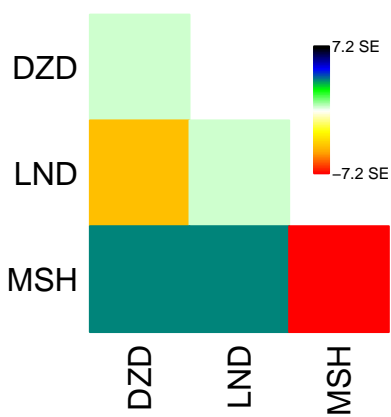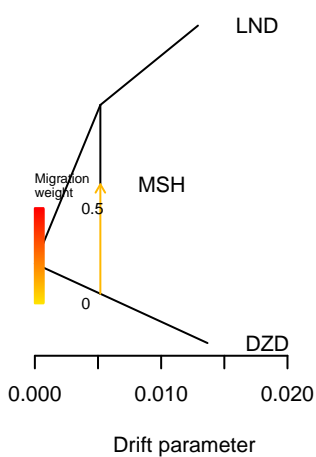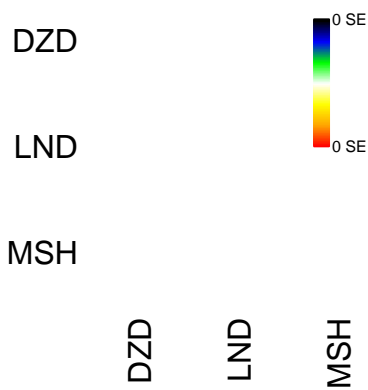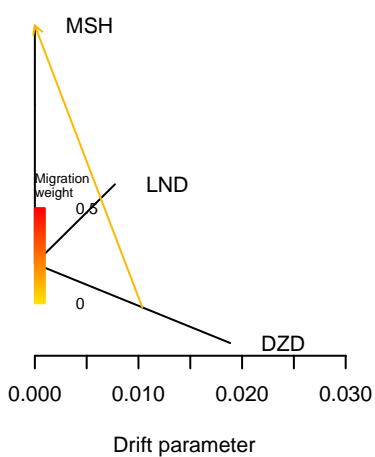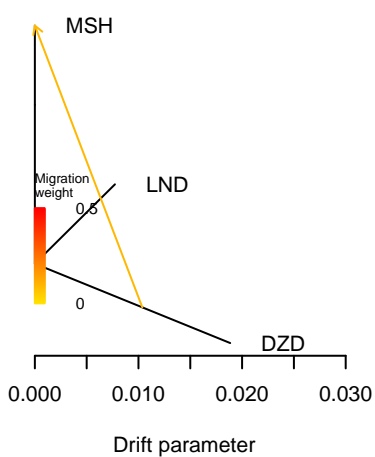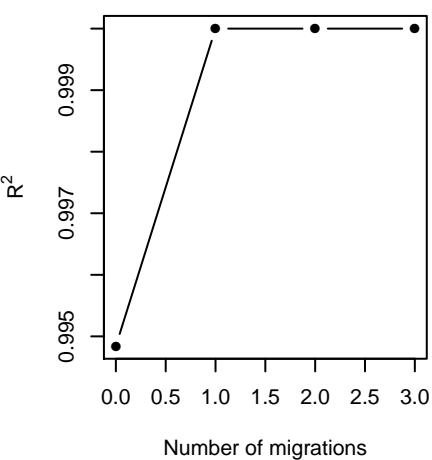

SouthAfrica

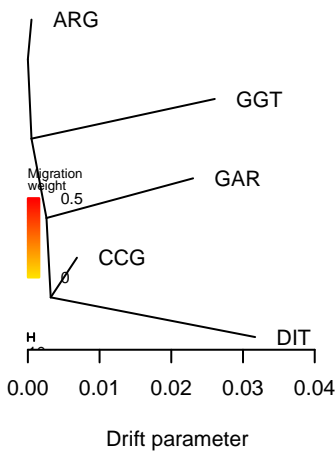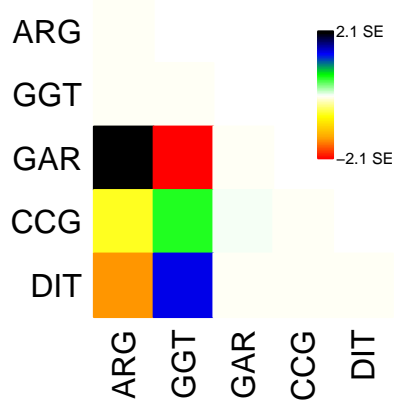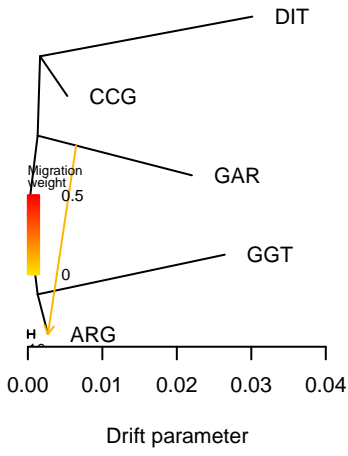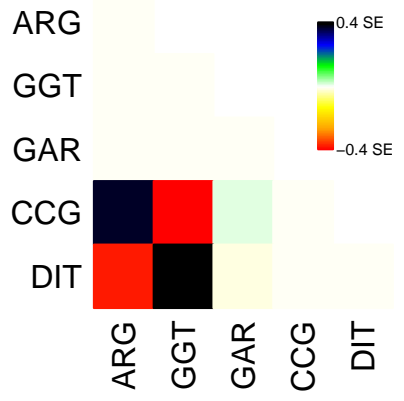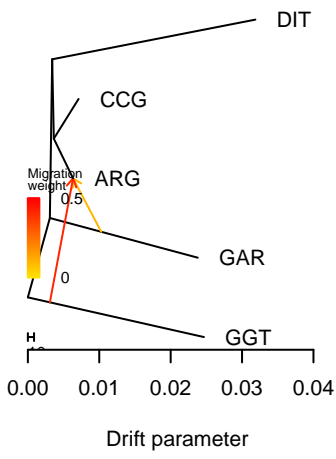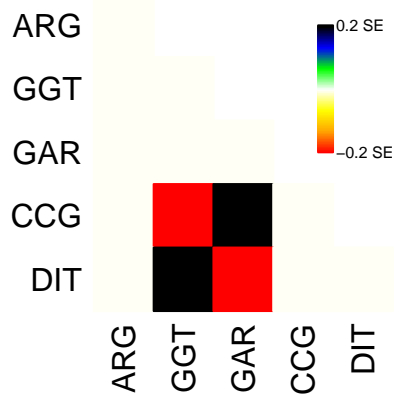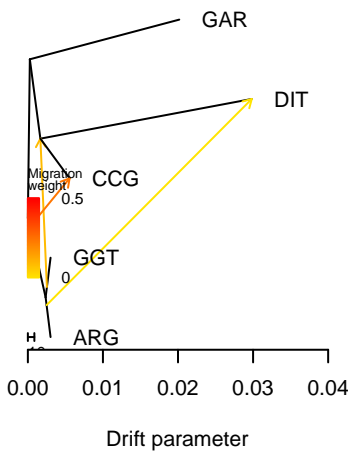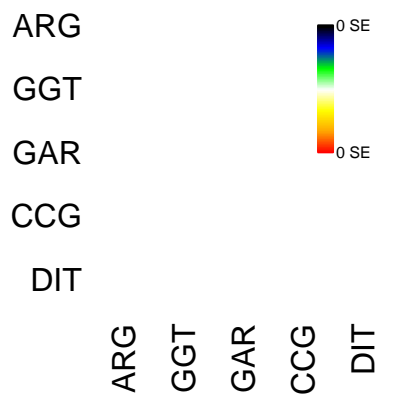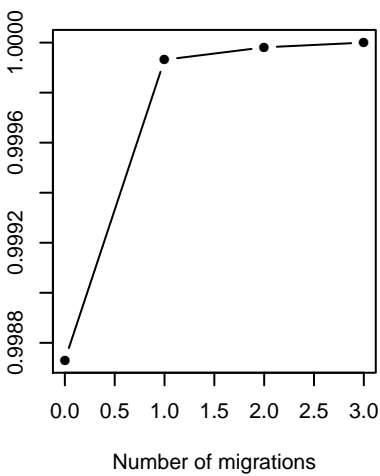

SouthEastEurope

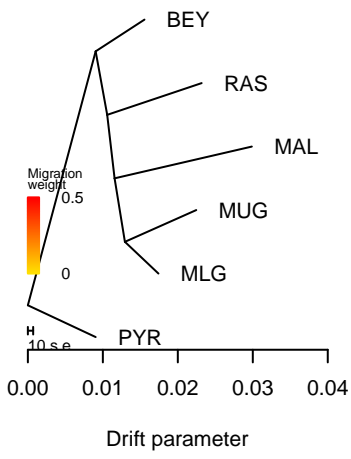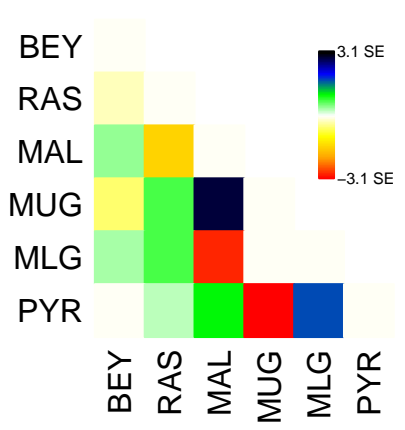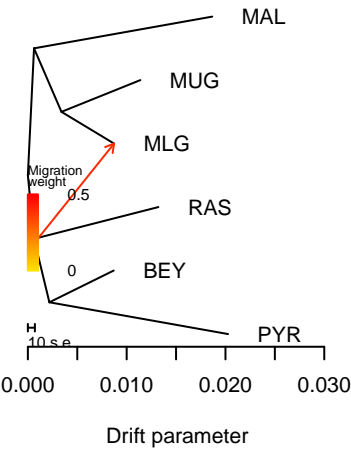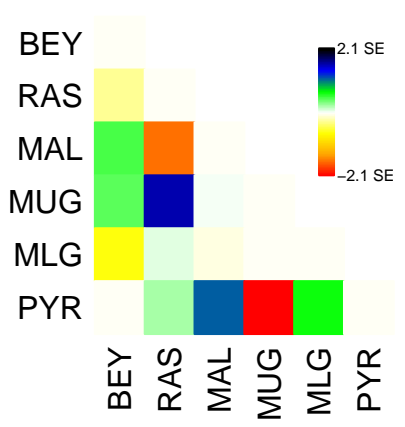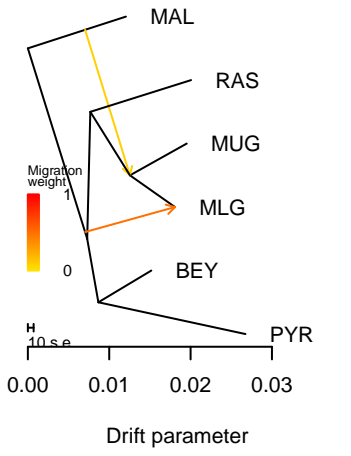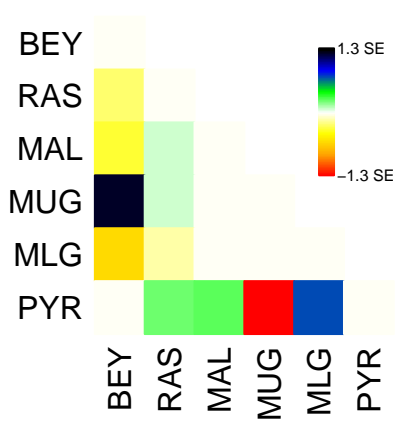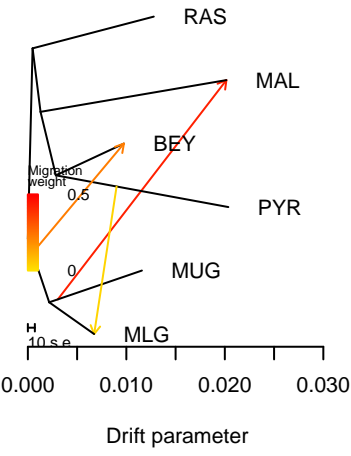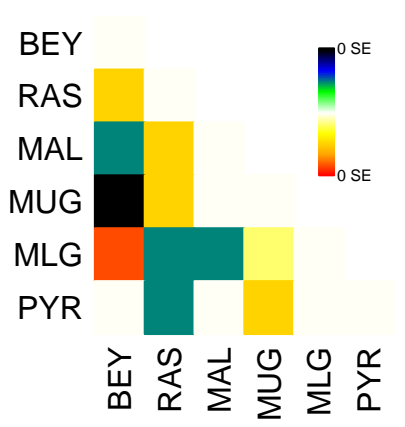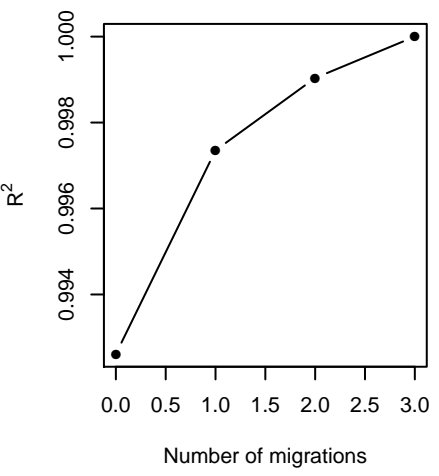

SouthWestEurope
